# Supplementary material for: Silver-catalyzed pyrazole migration and cycloaddition reaction of diazo pyrazoleamides with ketimines
Source: Royal Society of Chemistry journal article supplement (doi:10.1039/d3cc03253a), 2023-01-01
Supplement: d3cc03253a1.pdf [file d3cc03253a1.pdf]

## Supporting Information

### Silver-Catalyzed Pyrazole Migration and Cycloaddition Reaction of Diazo Pyrazoleamides with Ketimines

Maoqing Shi, Gejun Niu, Tianyuan Zhang, Aimin Xu, Rimei Zheng, Abdulla Yusuf,  
Taoda Shi,\* Wenhao Hu,\* Yu Qian\*

#### Table of Contents

|                                                                                                          |       |
|----------------------------------------------------------------------------------------------------------|-------|
| 1. General information & materials .....                                                                 | S-1   |
| 2. General procedure for the synthesis and analytical data of diazo compounds <b>1</b> & <b>1'</b> ..... | S-2   |
| 3. General Procedure for the Synthesis of ketimine Compounds <b>2</b> .....                              | S-6   |
| 4. Experimental procedures.....                                                                          | S-7   |
| 5. Product derivatizations.....                                                                          | S-9   |
| 6. References.....                                                                                       | S-11  |
| 7. Analytical data of compounds <b>3, 4, 5, 5', 6, 7, 8</b> .....                                        | S-12  |
| 8. NMR spectra of compounds <b>1, 1', 3, 4, 5, 5', 6, 7, 8</b> .....                                     | S-37  |
| 9. Single crystal X-ray diffraction data. ....                                                           | S-105 |
| 10. Computational Studies .....                                                                          | S-109 |

## 1. General information & materials

**General information:** All  $^1\text{H}$  NMR (400 or 500 MHz) and  $^{13}\text{C}$  NMR (100 or 125 MHz) and  $^{19}\text{F}$  NMR (376 MHz) spectra were recorded on Bruker spectrometers in  $\text{CDCl}_3$  or  $\text{DMSO-d}_6$ .  $^1\text{H}$  NMR and  $^{13}\text{C}$  NMR spectra were recorded in  $\text{CDCl}_3$  on a 400 or 500 MHz spectrometer; chemical shifts were reported in ppm with the solvent signal as reference, and coupling constants ( $J$ ) were given in Hertz. The peak information was described as: s = singlet, d = doublet, t = triplet, q = quartet, m = multiplet, br = broad. High-resolution mass spectrometry (HRMS) were recorded on a commercial apparatus (ESI or CI Source).

**Materials:** Solvent  $\text{CH}_2\text{Cl}_2$  was distilled over calcium hydride. Isatin-derived ketimines were prepared according to the literature method. 4 Å molecular sieve was dried in a Muffle furnace at 250 °C over 5 h. All reactions were carried out under nitrogen atmosphere in a well-dried glassware.

## 2. General procedure for the synthesis and analytical data of diazo compounds 1 & 1'.<sup>1</sup>

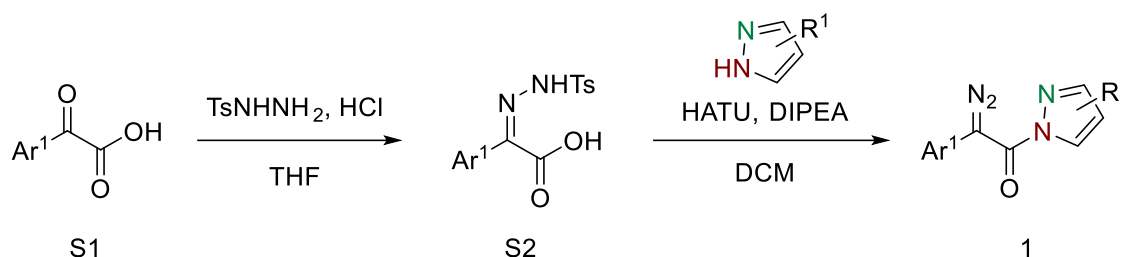

**Synthesis of S2:** To a solution of corresponding acid (10 mmol, 1.0 equiv.) and 4-Methylbenzenesulfonylhydrazide (1.86 g, 10 mmol, 1.0 equiv.) in THF (20 mL), was added a small amount of HCl. Then the reaction mixture was stirred at room temperature overnight. When the reaction was completed (monitored by TLC), the solvent was evaporated under vacuum to afford **S2** in > 80% yields, which was used in the next step without further purification.

**Synthesis of 1:** To a 50-mL oven-dried flask containing a magnetic stirring bar, **S2** (1.5 mmol) in DCM (10 mL), was added DIPEA (0.78 g, 6.0 mmol, 4.0 equiv.) and HATU (0.68 g, 1.8 mmol, 1.2 equiv.) slowly at 0 °C, and the resulting reaction mixture was stirred at 0 °C for 20 min. Then corresponding pyrazole (1.6 mmol, 1.05 equiv.) was added. The reaction mixture was diluted with DCM (20 mL) and washed with 10 % citric acid solution (20 mL), saturated aqueous NaHCO<sub>3</sub> (20 mL), and saturated aqueous NaCl (20 mL) in sequence, and the separated organic phase was dried with anhydrous Na<sub>2</sub>SO<sub>4</sub>. The solvent was evaporated in vacuo after filtration, and the residue was purified by column chromatography on silica gel (eluent: EtOAc/light petroleum ether = 1/100~1/50) to provide diazo compounds **1**.

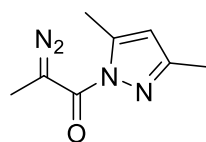

### 2-diazo-1-(3,5-dimethyl-1H-pyrazol-1-yl)propan-1-one

**1a:** Green oil.

<sup>1</sup>H NMR (400 MHz, CDCl<sub>3</sub>) δ 5.92 (s, 1H), 2.51 (s, 3H), 2.20 (s, 3H), 2.14 (s, 3H);

$^{13}\text{C}$  NMR (125 MHz,  $\text{CDCl}_3$ )  $\delta$  163.8, 150.2, 143.4, 109.8, 53.4, 13.9, 13.7, 11.1.

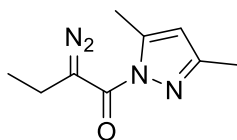

**2-diazo-1-(3,5-dimethyl-1H-pyrazol-1-yl)butan-1-one.**

**1b:** Green oil.

$^1\text{H}$  NMR (500 MHz,  $\text{CDCl}_3$ )  $\delta$  5.82 (s, 1H), 2.49 – 2.45 (m, 2H), 2.42 (s, 3H), 2.11 (s, 3H), 1.11 (t,  $J = 7.5$  Hz, 3H);

$^{13}\text{C}$  NMR (125 MHz,  $\text{CDCl}_3$ )  $\delta$  163.2, 150.0, 143.4, 109.8, 60.8, 18.8, 13.9, 13.7, 11.5.

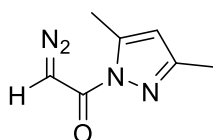

**2-diazo-1-(3,5-dimethyl-1H-pyrazol-1-yl)ethan-1-one**

**1c:** Green oil.

$^1\text{H}$  NMR (500 MHz,  $\text{CDCl}_3$ )  $\delta$  6.30 (s, 1H), 5.98 (s, 1H), 2.57 (s, 3H), 2.22 (s, 3H);

$^{13}\text{C}$  NMR (125 MHz,  $\text{CDCl}_3$ )  $\delta$  165.5, 151.9, 143.7, 111.3, 49.8, 14.1, 13.8.

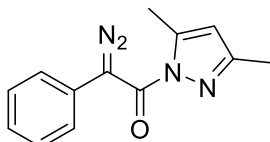

**2-diazo-1-(3,5-dimethyl-1H-pyrazol-1-yl)-2-phenylethan-1-one.**

**1'a:** Orange oil.

$^1\text{H}$  NMR (400 MHz,  $\text{CDCl}_3$ )  $\delta$  7.52 (d,  $J = 7.6$  Hz, 2H), 7.39 (m, 2H), 7.22 (m, 1H), 5.95 (s, 1H), 2.53 (s, 3H), 2.21 (s, 3H);

$^{13}\text{C}$  NMR (100 MHz,  $\text{CDCl}_3$ )  $\delta$  161.8, 150.3, 143.8, 128.9, 126.7, 126.6, 125.7, 110.3, 65.7, 13.9, 13.7.

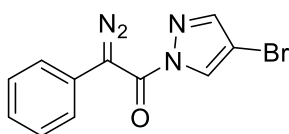

**1-(4-bromo-1H-pyrazol-1-yl)-2-diazo-2-phenylethan-1-one.**

**1'b:** Orange oil.

**<sup>1</sup>H NMR** (500 MHz, CDCl<sub>3</sub>) δ 8.31 (s, 1H), 7.60 (s, 1H), 7.55 (m, 2H), 7.43 (m, 2H), 7.28 (m, 1H);

**<sup>13</sup>C NMR** (125 MHz, CDCl<sub>3</sub>) δ 158.7, 142.8, 129.2, 129.2, 127.2, 125.9, 125.7, 98.2, 64.8.

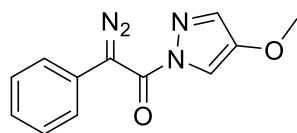

**2-diazo-1-(4-methoxy-1H-pyrazol-1-yl)-2-phenylethan-1-one.**

**1'c:** Orange oil.

**<sup>1</sup>H NMR** (500 MHz, CDCl<sub>3</sub>) δ 7.86 (d, J = 0.9 Hz, 1H), 7.58 – 7.54 (m, 2H), 7.46 – 7.42 (m, 3H), 7.29– 7.25 (m, 1H), 3.80 (s, 3H);

**<sup>13</sup>C NMR** (125 MHz, CDCl<sub>3</sub>) δ 159.7, 148.8, 133.2, 129.1, 126.9, 126.4, 125.8, 110.6, 64.2, 58.9.

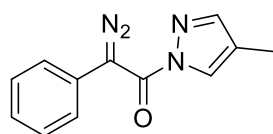

**2-diazo-1-(4-methyl-1H-pyrazol-1-yl)-2-phenylethan-1-one.**

**1'd:** Orange oil.

**<sup>1</sup>H NMR** (400 MHz, CDCl<sub>3</sub>) δ 8.06 (s, 1H), 7.60 – 7.55 (m, 2H), 7.50 (s, 1H), 7.46 – 7.41 (m, 2H), 7.29 – 7.25 (m, 1H), 2.14 (d, J = 0.5 Hz, 3H);

**<sup>13</sup>C NMR** (100 MHz, CDCl<sub>3</sub>) δ 159.9, 143.7, 129.1, 127.2, 126.9, 126.4, 125.9, 119.5, 64.7, 9.0.

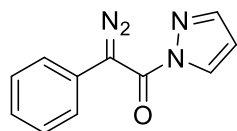

**2-diazo-2-phenyl-1-(1H-pyrazol-1-yl)ethan-1-one.**

**1'e:** Orange oil.

**<sup>1</sup>H NMR** (500 MHz, CDCl<sub>3</sub>) δ 8.30 (d, J = 2.6 Hz, 1H), 7.66 (d, J = 0.5 Hz, 1H), 7.57 (m, 2H), 7.42 (m, 2H), 7.26 (m, 1H), 6.42 (m, 1H);

**<sup>13</sup>C NMR** (125 MHz, CDCl<sub>3</sub>) δ 159.8, 142.4, 129.2, 129.1, 127.0, 126.2, 125.9, 108.7, 65.0.

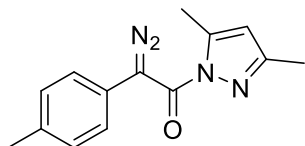

**2-diazo-1-(3,5-dimethyl-1H-pyrazol-1-yl)-2-(p-tolyl)ethan-1-one**

**1'f:** Orange oil.

**<sup>1</sup>H NMR** (500 MHz, CDCl<sub>3</sub>) δ 7.42 (d, *J* = 8.3 Hz, 2H), 7.23 (d, *J* = 8.1 Hz, 2H), 5.98 (s, 1H), 2.55 (s, 3H), 2.36 (s, 3H), 2.24 (s, 3H);

**<sup>13</sup>C NMR** (125 MHz, CDCl<sub>3</sub>) δ 162.2, 150.4, 143.9, 136.7, 129.8, 126.0, 123.5, 110.4, 65.6, 21.2, 14.0, 13.8.

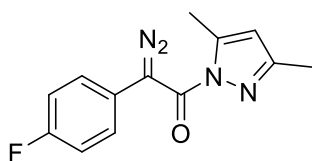

**2-diazo-1-(3,5-dimethyl-1H-pyrazol-1-yl)-2-(4-fluorophenyl)ethan-1-one**

**1'g:** Orange oil.

**<sup>1</sup>H NMR** (400 MHz, CDCl<sub>3</sub>) δ 7.53 – 7.48 (m, 2H), 7.15 – 7.10 (m, 2H), 5.98 (s, 1H), 2.54 (s, 3H), 2.24 (s, 3H);

**<sup>13</sup>C NMR** (125 MHz, CDCl<sub>3</sub>) δ 161.9, 161.6 (d, *J* = 247.2 Hz), 150.5, 143.9, 127.9 (d, *J* = 8.1 Hz), 122.6, 116.0 (d, *J* = 22.0 Hz), 110.4, 60.4, 13.9, 13.7;

**<sup>19</sup>F NMR** (376 MHz, CDCl<sub>3</sub>) δ -115.10.

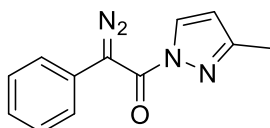

**2-diazo-1-(5-methyl-1H-pyrazol-1-yl)-2-phenylethan-1-one**

**1'h:** Orange oil.

**<sup>1</sup>H NMR** (500 MHz, CDCl<sub>3</sub>) δ 8.12 (d, *J* = 2.7 Hz, 1H), 7.51 – 7.48 (m, 2H), 7.37 – 7.34 (m, 2H), 7.20– 7.17 (m, 1H), 6.16 (d, *J* = 2.7 Hz, 1H), 2.24 (s, 3H);

**<sup>13</sup>C NMR** (100 MHz, CDCl<sub>3</sub>) δ 159.7, 152.3, 129.8, 129.0, 126.8, 126.5, 125.8, 109.3, 64.7, 14.0.

### 3. General Procedure for the Synthesis of ketimine Compounds **2**.<sup>2</sup>

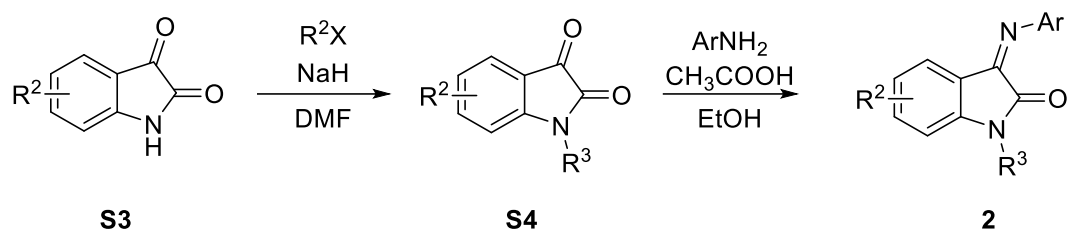

**Synthesis of S4:** To a solution of corresponding isatin (10 mmol, 1.0 equiv.) in DMF (20 mL), was added NaH (12 mmol, 480 mg, 60% dispersion in mineral oil) slowly at 0 °C. After stirred at 0 °C 10 minutes, the corresponding halide (15 mmol) was added in. The reaction mixture was then stirred at room temperature overnight. After the reaction go to completion (monitored by TLC), the mixture was quenched with saturated aqueous  $NH_4Cl$  (100 mL), and washed with saturated aqueous  $NaHCO_3$  (100 mL) and brine (100 mL) in sequence. The separated organic phase was dried with anhydrous  $Na_2SO_4$  and evaporated in vacuo after filtration. The residue was then purified by column chromatography on silica gel (eluent: EtOAc/light petroleum ether = 1/10~1/4) to provide compounds **S4** as dark red solid (90~95% yield).

**Synthesis of 2:** To a solution of **S4** (10 mmol, 1.0 equiv.) in EtOH (20 mL), was added corresponding amine and 5 mol% catalytic amount of AcOH. The reaction mixture was then stirred at reflux temperature overnight. After the reaction go to completion (monitored by TLC), the solvent was evaporated and the residue was purified by column chromatography on silica gel (eluent: EtOAc/light petroleum ether = 1/10~1/4) to provide ketimine compounds **2** as red solid (85~95% yield).

## 4. Experimental procedures

### 4.1 General procedure for optimization of conditions of cycloaddition reaction

To a 10 mL oven-dried Schlenk reaction tube equipped with a magnetic stir bar, was added metal catalyst, solvent (1.0 mL), 4 Å molecular sieve (100 mg), and isatin-derived ketimines **2a** (31.2 mg, 0.1 mmol). The Schlenk tube was sealed with a septum, evacuated and refilled with nitrogen (3 times). The solution of the diazo compound **1a** (26.7 mg, 0.15 mmol, 1.5 eq) in 1.0 mL solvent (same as above) was added to the mixture for 1 h via a syringe pump at indicate temperature. After completion of the addition, stirring was continued at indicate temperature until the diazo compound was consumed. The solvent was evaporated under vacuum after filtering through celite. The crude mixture was use directly for diastereoselectivities determination via crude <sup>1</sup>H NMR spectral analyses and then purified by column chromatography on silica gel (eluent: EtOAc/light petroleum ether = 1/30~1/5) to give the product **3a**.

### 4.2 General procedure for the diastereoselective cycloaddition reaction

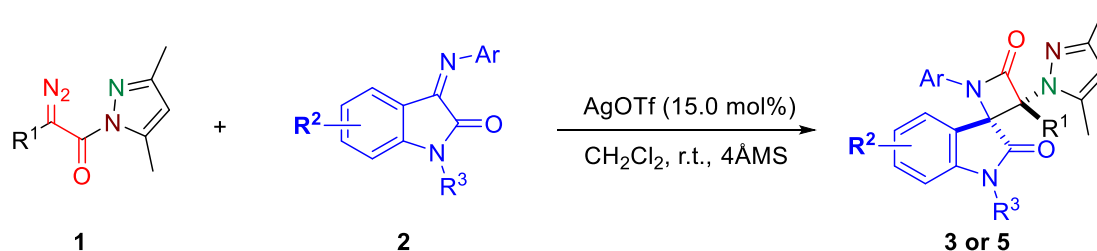

To a 10 mL oven-dried Schlenk reaction tube equipped with a magnetic stir bar, was added AgOTf (7.7 mg, 15.0 mol %), CH<sub>2</sub>Cl<sub>2</sub> (2.0 mL), isatin-derived ketimines **2** (0.2 mmol), and 4 Å molecular sieve (200 mg). The Schlenk tube was sealed with a septum, evacuated and refilled with nitrogen (3 times). The solution of the diazo compound **1** (0.3 mmol, 1.5 eq) in 2.0 mL CH<sub>2</sub>Cl<sub>2</sub> was then added for 1 h via a syringe pump at room temperature. The reaction was then stirred at indicate temperature until the diazo compound was consumed completely. The solvent was evaporated under vacuum after filtering through celite. The crude mixture was use directly for diastereoselectivities determination via crude <sup>1</sup>H NMR spectral analyses



and then purified by column chromatography on silica gel (eluent: EtOAc/light petroleum ether = 1/30~1/5) to give product **3** or **5**.

#### 4.3 Procedure for the gram scale three-component reaction

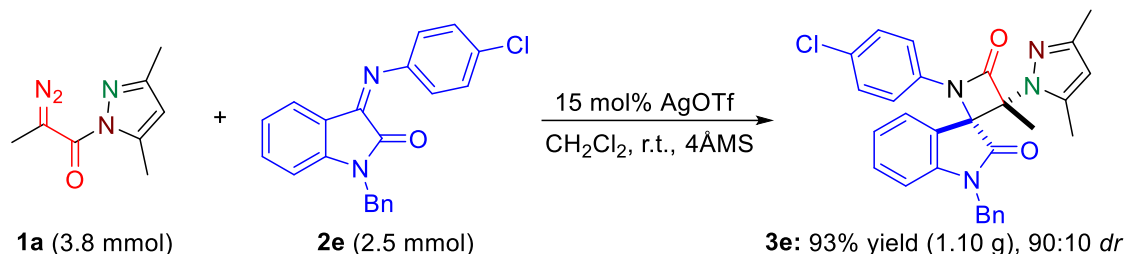

To a 100 mL oven-dried Schlenk reaction tube equipped with a magnetic stir bar, was added AgOTf (96.4 mg, 15.0 mol %), CH<sub>2</sub>Cl<sub>2</sub> (25.0 mL), isatin-derived ketimines **2e** (865.2 mg, 2.5 mmol), and 4 Å molecular sieve (300 mg). The Schlenk tube was sealed with a septum, evacuated and refilled with nitrogen (3 times). The solution of the diazo compound **1a** (676.4 mg, 3.8 mmol, 1.5 eq) in 25.0 mL CH<sub>2</sub>Cl<sub>2</sub> was then added to the reaction mixture for 1 h via a syringe pump at indicate temperature. The reaction was then stirred at indicate temperature until the diazo compound was consumed completely. The solvent was evaporated under vacuum after filtering through celite. The crude mixture was use directly for diastereoselectivities determination via crude <sup>1</sup>H NMR spectral analyses and then purified by column chromatography on silica gel (eluent: EtOAc/light petroleum ether = 1/30~1/5) to give the product **3e** (93% yield, 90:10 *dr*).

## 5. Product derivatizations

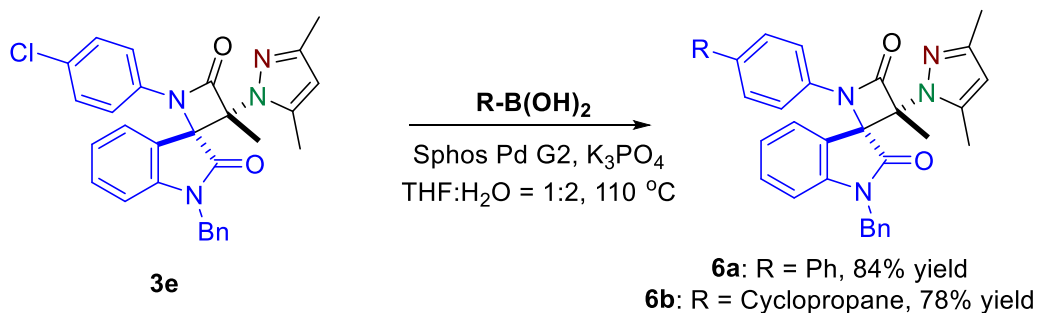

**Synthesis of 6:** To a 25-mL flask containing a magnetic stirring bar, was added **3e** (100 mg, 0.2 mmol), 1.0 mL of THF, 2.0 mL of H<sub>2</sub>O, boronic acid (0.4 mmol), Sphos Pd G2 (7.2 mg, 5 %), K<sub>3</sub>PO<sub>4</sub> (127.2 mg, 0.6 mmol). The mixture was then reacted at indicate temperature until the compound **3e** was consumed completely. The solvent was evaporated under vacuum after filtering through Celite. Extracted with ethyl acetate (5 mL \* 3). The organic phase was collected and washed with brine, dried over anhydrous Na<sub>2</sub>SO<sub>4</sub>. The solvent was removed in vacuo after filtration and the residue was purified by flash chromatography (eluent: EtOAc/light petroleum ether = 1/10~1/2) to give **6** as a white powder in corresponding yield.

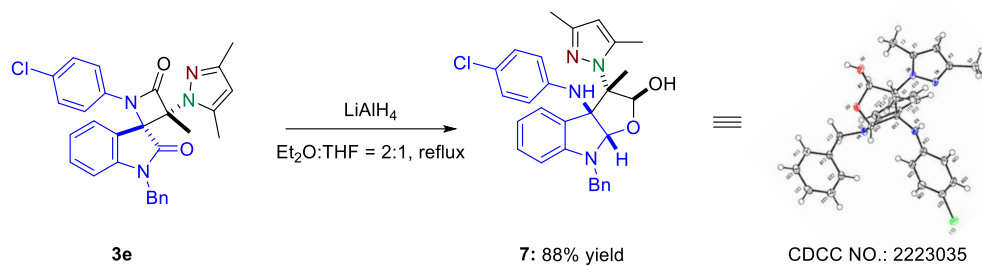

**Synthesis of 7:** To a 25-mL flask containing a magnetic stirring bar, was added **3e** (100 mg, 0.2 mmol), LiAlH<sub>4</sub> (38 mg, 1.0 mmol), THF (1.0 mL), Et<sub>2</sub>O (2.0 mL) were added to the above reaction flask. The mixture was then reacted at indicate temperature until the compound **3e** was consumed completely. The reaction was quenched with wet Na<sub>2</sub>SO<sub>4</sub> and extracted with ethyl acetate (5 mL \* 2). The organic phase was washed with brine and dried over anhydrous Na<sub>2</sub>SO<sub>4</sub>. The solvent was removed in vacuo after filtration and the residue was purified by flash chromatography (eluent: EtOAc/light petroleum ether = 1/10~1/2) to give **7** as a white powder (88 mg, 88% yield).

## 6. References

- (1) R. M. Stephanie , Peter Wipf, *Synthesis* **2019**, 51, 213.
- (2) (a) M. Rajopadhye, F. D. Dopp, *J. Heterocycl. Chem.* **1985**, 22, 93; (b) R. Bouhfid, N. Joly, M. Massoui, R. Cecchelli, V. Lequart, P. Martin, E. M. Assassi, *Heterocycles*, **2005**, 65, 2949.

## 7. Analytical data of compounds 3, 4, 5, 5', 6, 7, 8

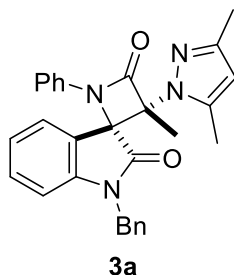

### 1'-benzyl-3-(3,5-dimethyl-1H-pyrazol-1-yl)-3-methyl-1-phenylspiro[azetidine-2,3'-indoline]-2',4-dione

**3a:** 91% yield, 93:7 *dr* (*cis:trans*), white solid, mp 164.6 - 166.5°C.

<sup>1</sup>H NMR (400 MHz, CDCl<sub>3</sub>) δ 7.35 – 7.26 (m, 7H), 7.20 (t, *J* = 7.8 Hz, 2H), 7.12 – 7.01 (m, 4H), 6.79 (d, *J* = 8.0 Hz, 1H), 5.78 (s, 1H), 5.05 (d, *J* = 15.8 Hz, 1H), 4.62 (d, *J* = 15.8 Hz, 1H), 2.58 (s, 3H), 2.13 (s, 3H), 2.08 (s, 3H).

<sup>13</sup>C NMR (100 MHz, CDCl<sub>3</sub>) δ 171.6, 163.7, 149.1, 144.0, 136.0, 135.2, 130.9, 129.4 (two carbon signals overlapped), 128.9, 127.8, 127.3, 126.3, 125.2, 122.7, 121.4, 117.7, 110.7, 107.0, 78.7, 70.8, 44.4, 22.2, 13.8, 13.4.

**HRMS-ESI:** calculated for C<sub>29</sub>H<sub>26</sub>N<sub>4</sub>O<sub>2</sub> [M + Na]<sup>+</sup>: 485.1948, found: 485.1949

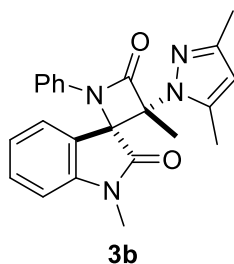

### 3-(3,5-dimethyl-1H-pyrazol-1-yl)-1',3-dimethyl-1-phenylspiro[azetidine-2,3'-indoline]-2',4-dione

**3b:** 86% yield, 93:7 *dr* (*cis:trans*), white solid, mp 147.9 - 150.5°C.

<sup>1</sup>H NMR (400 MHz, CDCl<sub>3</sub>) δ 7.43 (t, *J* = 7.8 Hz, 1H), 7.27 (d, *J* = 7.0 Hz, 1H), 7.20 (t, *J* = 7.9 Hz, 2H), 7.10 – 7.04 (m, 4H), 6.97 (d, *J* = 7.8 Hz, 1H), 5.76 (s, 1H), 3.12 (s, 3H), 2.52 (s, 3H), 2.10 (s, 3H), 1.99 (s, 3H).

$^{13}\text{C}$  NMR (100 MHz,  $\text{CDCl}_3$ )  $\delta$  171.4, 163.5, 149.1, 144.9, 136.2, 131.2, 129.5 (*two carbon signals overlapped*), 126.3, 125.3, 122.7, 121.3, 117.8, 109.6, 107.1, 78.8, 70.7, 26.7, 22.3, 13.7, 13.3.

**HRMS-ESI:** calculated for  $\text{C}_{23}\text{H}_{22}\text{N}_4\text{O}_2$   $[\text{M} + \text{H}]^+$ : 387.1816, found: 387.1817

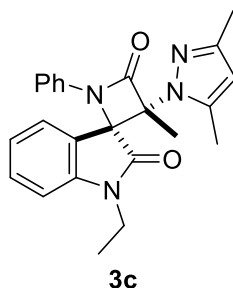

**3-(3,5-dimethyl-1H-pyrazol-1-yl)-1'-ethyl-3-methyl-1-phenylspiro[azetidine-2,3'-indoline]-2',4-dione**

**3c:** 88% yield, 90:10 *dr* (*cis:trans*), yellow solid, mp 156.7 - 159.2°C.

$^1\text{H}$  NMR (400 MHz,  $\text{CDCl}_3$ )  $\delta$  7.41 (td,  $J = 7.8, 1.0$  Hz, 1H), 7.27 (d,  $J = 7.9$  Hz, 1H), 7.24 – 7.15 (m, 2H), 7.14 – 7.01 (m, 4H), 6.98 (d,  $J = 7.9$  Hz, 1H), 5.75 (s, 1H), 3.85 (dq,  $J = 14.5, 7.3$  Hz, 1H), 3.46 (dq,  $J = 14.2, 7.1$  Hz, 1H), 2.54 (s, 3H), 2.08 (s, 3H), 2.01 (s, 3H), 1.16 (t,  $J = 7.2$  Hz, 3H).

$^{13}\text{C}$  NMR (125 MHz,  $\text{CDCl}_3$ )  $\delta$  170.7, 163.6, 148.9, 144.0, 136.1, 131.0, 129.4 (*two carbon signals overlapped*), 126.5, 125.2, 122.4, 121.4, 117.7, 109.4, 106.9, 78.5, 70.7, 35.2, 22.3, 13.6, 13.3, 12.3.

**HRMS-ESI:** calculated for  $\text{C}_{24}\text{H}_{24}\text{N}_4\text{O}_2$   $[\text{M} + \text{H}]^+$ : 401.1972, found: 401.1971

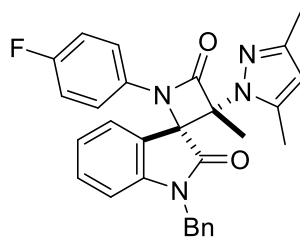

**1'-benzyl-3-(3,5-dimethyl-1H-pyrazol-1-yl)-1-(4-fluorophenyl)-3-methylspiro[azetidine-2,3'-indoline]-2',4-dione**

**3d:** 92% yield, 89:11 *dr* (*cis:trans*), white solid, mp 159.4 - 161.3°C.

**<sup>1</sup>H NMR** (500 MHz, CDCl<sub>3</sub>) δ 7.34 – 7.26 (m, 7H), 7.09 – 7.02 (m, 3H), 6.92 – 6.86 (m, 2H), 6.80 (d, *J* = 7.8 Hz, 1H), 5.77 (s, 1H), 5.03 (d, *J* = 15.8 Hz, 1H), 4.60 (d, *J* = 15.8 Hz, 1H), 2.55 (s, 3H), 2.12 (s, 3H), 2.06 (s, 3H).

**<sup>13</sup>C NMR** (125 MHz, CDCl<sub>3</sub>) δ 171.5, 163.5, 159.8 (d, *J* = 245.5 Hz), 149.2, 144.1, 135.2, 132.2 (d, *J* = 2.8 Hz), 131.1, 129.0 (two carbon signals overlapped), 127.9, 127.4, 126.3, 122.8, 121.1, 119.4 (d, *J* = 8.1 Hz), 116.3 (d, *J* = 22.9 Hz), 110.8, 107.1, 79.0, 71.0, 44.5, 22.3, 13.8, 13.4.

**<sup>19</sup>F NMR** (376 MHz, CDCl<sub>3</sub>) δ -115.91.

**HRMS-ESI:** calculated for C<sub>29</sub>H<sub>25</sub>FN<sub>4</sub>O<sub>2</sub> [M + Na]<sup>+</sup>: 503.1854, found: 503.1853

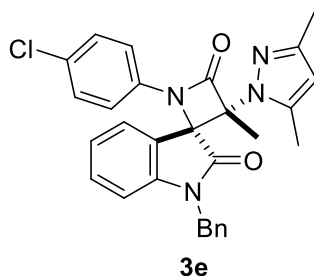

**1'-benzyl-1-(4-chlorophenyl)-3-(3,5-dimethyl-1H-pyrazol-1-yl)-3-methylspiro[azetidine-2,3'-indoline]-2',4-dione**

**3e:** 90% yield, 90:10 *dr* (*cis:trans*), yellow solid, mp 167.3 - 169.4°C.

**<sup>1</sup>H NMR** (500 MHz, CDCl<sub>3</sub>) δ 7.35 – 7.26 (m, 7H), 7.16 (d, *J* = 8.7 Hz, 2H), 7.06 – 7.01 (m, 3H), 6.80 (d, *J* = 7.9 Hz, 1H), 5.77 (s, 1H), 5.02 (d, *J* = 15.7 Hz, 1H), 4.61 (d, *J* = 15.8 Hz, 1H), 2.54 (s, 3H), 2.12 (s, 3H), 2.06 (s, 3H).

**<sup>13</sup>C NMR** (125 MHz, CDCl<sub>3</sub>) δ 171.4, 163.6, 149.2, 144.0, 135.1, 134.5, 131.1, 130.5, 129.5, 129.0 (two carbon signals overlapped), 127.9, 127.4, 126.3, 122.8, 121.0, 118.9, 110.8, 107.1, 79.0, 70.9, 44.5, 22.2, 13.8, 13.4.

**HRMS-ESI:** calculated for C<sub>29</sub>H<sub>25</sub>ClN<sub>4</sub>O<sub>2</sub> [M + Na]<sup>+</sup>: 519.1558, found: 519.1557

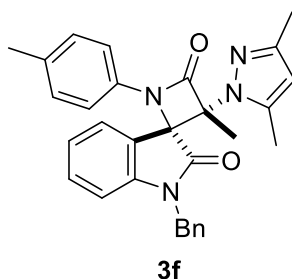

**1'-benzyl-3-(3,5-dimethyl-1H-pyrazol-1-yl)-3-methyl-1-(p-tolyl)spiro[azetidine-2,3'-indoline]-2',4-dione**

**3f**: 89% yield, 93:7 *dr* (*cis:trans*), white solid, mp 206.8 - 208.9°C.

<sup>1</sup>H NMR (500 MHz, CDCl<sub>3</sub>) δ 7.35 – 7.31 (m, 2H), 7.29 – 7.26 (m, 5H), 7.04 – 6.97 (m, 5H), 6.77 (d, *J* = 8.1 Hz, 1H), 5.76 (s, 1H), 5.03 (d, *J* = 15.8 Hz, 1H), 4.60 (d, *J* = 15.8 Hz, 1H), 2.57 (s, 3H), 2.25 (s, 3H), 2.12 (s, 3H), 2.06 (s, 3H).

<sup>13</sup>C NMR (125 MHz, CDCl<sub>3</sub>) δ 171.7, 163.5, 149.1, 144.1, 135.3, 135.1, 133.6, 130.9, 129.9, 129.0 (*two carbon signals overlapped*), 127.8, 127.4, 126.3, 122.6, 121.6, 117.7, 110.6, 107.0, 78.7, 70.9, 44.4, 22.2, 21.0, 13.8, 13.4.

**HRMS-ESI**: calculated for C<sub>30</sub>H<sub>28</sub>N<sub>4</sub>O<sub>2</sub> [M + Na]<sup>+</sup>: 499.2104, found: 499.2105

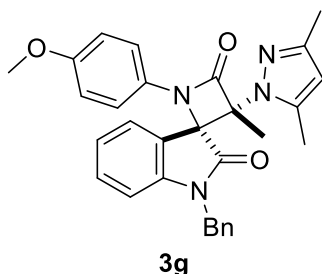

**1'-benzyl-3-(3,5-dimethyl-1H-pyrazol-1-yl)-1-(4-methoxyphenyl)-3-methylspiro[azetidine-2,3'-indoline]-2',4-dione**

**3g**: 88% yield, 90:10 *dr* (*cis:trans*), white solid, mp 171.5 - 174.5°C.

<sup>1</sup>H NMR (500 MHz, CDCl<sub>3</sub>) δ 7.34 – 7.26 (m, 7H), 7.06 – 7.02 (m, 3H), 6.75 (dd, *J* = 20.4, 8.4 Hz, 3H), 5.77 (s, 1H), 5.05 (d, *J* = 15.8 Hz, 1H), 4.59 (d, *J* = 15.8 Hz, 1H), 3.73 (s, 3H), 2.58 (s, 3H), 2.13 (s, 3H), 2.06 (s, 3H).

<sup>13</sup>C NMR (125 MHz, CDCl<sub>3</sub>) δ 171.8, 163.3, 157.1, 149.1, 144.1, 135.2, 130.9, 129.3, 129.0 (*two carbon signals overlapped*), 127.8, 127.3, 126.3, 122.7, 121.5, 119.4, 114.6, 110.6, 107.0, 78.7, 71.1, 55.6, 44.4, 22.2, 13.8, 13.4.

**HRMS-ESI**: calculated for C<sub>30</sub>H<sub>28</sub>N<sub>4</sub>O<sub>3</sub> [M + Na]<sup>+</sup>: 515.2054, found: 515.2054

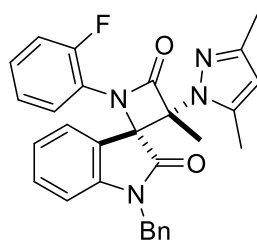



**1'-benzyl-3-(3,5-dimethyl-1H-pyrazol-1-yl)-1-(2-fluorophenyl)-3-methylspiro[azetidione-2,3'-indoline]-2',4-dione**

**3h**: 83% yield, 93:7 *dr* (*cis:trans*), white solid, mp 188.7 - 191.3°C.

<sup>1</sup>H NMR (400 MHz, CDCl<sub>3</sub>) δ 8.03 – 7.95 (m, 1H), 7.34 – 7.28 (m, 2H), 7.26 – 7.17 (m, 5H), 7.14 – 7.07 (m, 2H), 6.98 – 6.89 (m, 2H), 6.64 (d, *J* = 7.8 Hz, 1H), 5.77 (s, 1H), 5.09 (d, *J* = 15.9 Hz, 1H), 4.42 (d, *J* = 16.0 Hz, 1H), 2.57 (s, 3H), 2.12 (s, 3H), 2.05 (s, 3H).

<sup>13</sup>C NMR (125 MHz, CDCl<sub>3</sub>) δ 172.6, 164.9, 153.3 (d, *J* = 248.4 Hz), 149.1, 144.6, 135.3, 130.7, 128.9 (two carbon signals overlapped), 127.6, 127.4 (d, *J* = 7.6 Hz), 127.1, 125.6, 124.9 (d, *J* = 3.5 Hz), 123.8, 123.0 (d, *J* = 11.8 Hz), 122.2, 122.1, 116.6 (d, *J* = 20.0 Hz), 110.4, 107.1, 79.1, 73.5, 44.4, 22.6, 13.8, 13.4.

<sup>19</sup>F NMR (376 MHz, CDCl<sub>3</sub>) δ -123.60.

**HRMS-ESI**: calculated for C<sub>29</sub>H<sub>25</sub>N<sub>4</sub>O<sub>2</sub> [M + Na]<sup>+</sup>: 503.1854, found: 503.1854

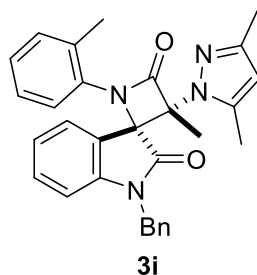

**1'-benzyl-3-(3,5-dimethyl-1H-pyrazol-1-yl)-3-methyl-1-(o-tolyl)spiro[azetidione-2,3'-indoline]-2',4-dione**

**3i**: 84% yield, 91:9 *dr* (*cis:trans*), white solid, mp 205.5 - 207.7°C.

<sup>1</sup>H NMR (500 MHz, CDCl<sub>3</sub>) δ 7.41 (d, *J* = 7.4 Hz, 1H), 7.32 – 7.27 (m, 3H), 7.23 – 7.15 (m, 5H), 7.10 (d, *J* = 7.8 Hz, 1H), 7.06 – 7.02 (m, 2H), 6.64 (d, *J* = 7.8 Hz, 1H), 5.79 (s, 1H), 5.09 (d, *J* = 15.9 Hz, 1H), 4.49 (d, *J* = 15.9 Hz, 1H), 2.62 (s, 3H), 2.55 (s, 3H), 2.15 (d, *J* = 10.7 Hz, 6H).

<sup>13</sup>C NMR (125 MHz, CDCl<sub>3</sub>) δ 172.9, 164.4, 149.0, 144.7, 135.3, 135.1, 133.3, 131.6, 130.9, 128.9, 128.5, 127.7, 127.1, 126.8, 126.4, 124.8, 122.5, 121.7, 110.5, 106.9, 100.1, 78.0, 73.9, 44.4, 23.2, 19.3, 13.8, 13.5.

**HRMS-ESI**: calculated for C<sub>30</sub>H<sub>28</sub>N<sub>4</sub>O<sub>2</sub> [M + Na]<sup>+</sup>: 499.2104, found: 499.2103

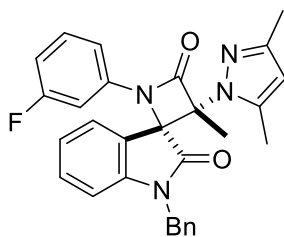

**3j**

**1'-benzyl-3-(3,5-dimethyl-1H-pyrazol-1-yl)-1-(3-fluorophenyl)-3-methylspiro[azetidine-2,3'-indoline]-2',4-dione**

**3j**: 91% yield, 89:11 *dr* (*cis:trans*), yellow solid, mp 148.2 - 150.4°C.

**<sup>1</sup>H NMR** (500 MHz, CDCl<sub>3</sub>) δ 7.35 – 7.26 (m, 7H), 7.13 (td, *J* = 8.2, 6.4 Hz, 1H), 7.06 (t, *J* = 7.6 Hz, 1H), 6.96 (dt, *J* = 10.0, 2.1 Hz, 1H), 6.81 – 6.72 (m, 3H), 5.77 (s, 1H), 5.03 (d, *J* = 15.8 Hz, 1H), 4.62 (d, *J* = 15.8 Hz, 1H), 2.55 (s, 3H), 2.12 (s, 3H), 2.06 (s, 3H).

**<sup>13</sup>C NMR** (125 MHz, CDCl<sub>3</sub>) δ 171.3, 163.8, 163.0 (d, *J* = 247.0 Hz) , 149.2, 144.0, 137.3 (d, *J* = 10.3 Hz), 135.1, 131.2, 130.8 (d, *J* = 9.3 Hz), 129.0, 127.9, 127.3, 126.3, 122.8, 121.0, 113.0 (d, *J* = 3.0 Hz) , 112.2 (d, *J* = 21.3 Hz) , 110.9, 107.2, 105.6 (d, *J* = 26.3 Hz), 100.1, 79.0, 71.0, 44.5, 22.3, 13.8, 13.4.

**<sup>19</sup>F NMR** (376 MHz, CDCl<sub>3</sub>) δ -110.12.

**HRMS-ESI**: calculated for C<sub>29</sub>H<sub>25</sub>N<sub>4</sub>O<sub>2</sub> [M + Na]<sup>+</sup> : 503.1854, found: 503.1855

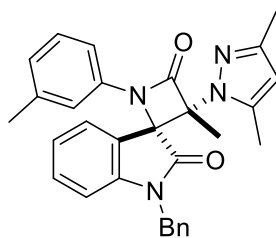

**3k**

**1'-benzyl-3-(3,5-dimethyl-1H-pyrazol-1-yl)-3-methyl-1-(m-tolyl)spiro[azetidine-2,3'-indoline]-2',4-dione**

**3k**: 89% yield, 90:10 *dr* (*cis:trans*), white solid, mp 139.7 - 142.8°C.

**<sup>1</sup>H NMR** (500 MHz, CDCl<sub>3</sub>) δ 7.34 – 7.27 (m, 7H), 7.15 (s, 1H), 7.03 (t, *J* = 7.7 Hz, 2H), 6.89 (d, *J* = 7.5 Hz, 1H), 6.79 (d, *J* = 8.1 Hz, 1H), 6.65 (d, *J* = 7.9 Hz, 1H), 5.77 (s, 1H), 4.98 (d, *J* = 15.8 Hz, 1H), 4.65 (d, *J* = 15.8 Hz, 1H), 2.57 (s, 3H), 2.22 (s, 3H), 2.13 (s, 3H), 2.06 (s, 3H).

$^{13}\text{C}$  NMR (125 MHz,  $\text{CDCl}_3$ )  $\delta$  171.6, 163.7, 149.1, 144.0, 139.5, 136.0, 135.3, 130.9, 129.1, 129.0, 127.8, 127.4, 126.3, 126.2, 122.7, 121.5, 118.7, 114.4, 110.6, 107.0, 78.6, 70.8, 44.4, 22.3, 21.6, 13.8, 13.4.

**HRMS-ESI:** calculated for  $\text{C}_{30}\text{H}_{28}\text{N}_4\text{O}_2$   $[\text{M} + \text{Na}]^+$ : 499.2104, found: 499.2105

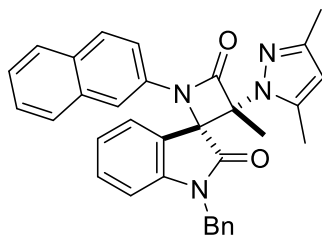

**3l**

**1'-benzyl-3-(3,5-dimethyl-1H-pyrazol-1-yl)-3-methyl-1-(naphthalen-2-yl)spiro[azetidione-2,3'-indoline]-2',4-dione**

**3l:** 84% yield, 94:6 *dr* (*cis:trans*), yellow solid, mp 172.8 - 175.3°C.

$^1\text{H}$  NMR (500 MHz,  $\text{CDCl}_3$ )  $\delta$  7.73 – 7.67 (m, 2H), 7.51 (d,  $J = 7.3$  Hz, 1H), 7.41 – 7.29 (m, 11H), 7.02 (t,  $J = 7.6$  Hz, 1H), 6.84 (d,  $J = 8.2$  Hz, 1H), 5.79 (s, 1H), 4.99 (d,  $J = 15.7$  Hz, 1H), 4.73 (d,  $J = 15.7$  Hz, 1H), 2.60 (s, 3H), 2.14 (s, 3H), 2.11 (s, 3H).

$^{13}\text{C}$  NMR (125 MHz,  $\text{CDCl}_3$ )  $\delta$  171.6, 163.9, 149.2, 144.1, 135.3, 133.7, 133.4, 131.0, 131.0, 129.6, 129.1 (*two carbon signals overlapped*), 127.9, 127.8, 127.7, 127.5, 126.9, 126.4, 125.7, 122.7, 121.4, 117.3, 114.9, 110.7, 107.1, 78.8, 71.0, 44.5, 22.3, 13.8, 13.4.

**HRMS-ESI:** calculated for  $\text{C}_{33}\text{H}_{28}\text{N}_4\text{O}_2$   $[\text{M} + \text{Na}]^+$ : 535.2104, found: 535.2103

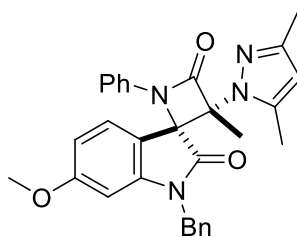

**3m**

**1'-benzyl-3-(3,5-dimethyl-1H-pyrazol-1-yl)-6'-methoxy-3-methyl-1-phenylspiro[azetidione-2,3'-indoline]-2',4-dione**

**3m:** 92% yield, 93:7 *dr* (*cis:trans*), yellow solid, mp 166.8 - 168.3°C.

$^1\text{H}$  NMR (500 MHz,  $\text{CDCl}_3$ )  $\delta$  7.32 – 7.28 (m, 2H), 7.26 – 7.21 (m, 3H), 7.19 – 7.15 (m, 3H), 7.08 – 7.03 (m, 3H), 6.49 (d,  $J = 8.2$  Hz, 1H), 6.35 (s, 1H), 5.74 (s, 1H), 4.96

(d,  $J = 15.7$  Hz, 1H), 4.58 (d,  $J = 15.8$  Hz, 1H), 3.72 (s, 3H), 2.53 (s, 3H), 2.10 (s, 3H), 2.03 (s, 3H).

$^{13}\text{C}$  NMR (125 MHz,  $\text{CDCl}_3$ )  $\delta$  172.1, 163.9, 162.1, 149.0, 145.4, 136.2, 135.2, 129.4, 129.0 (two carbon signals overlapped), 127.9, 127.4, 127.3, 125.2, 117.7, 112.9, 107.0, 106.5, 98.8, 78.5, 70.6, 55.6, 44.5, 22.3, 13.8, 13.4.

**HRMS-ESI:** calculated for  $\text{C}_{30}\text{H}_{28}\text{N}_4\text{O}_3$   $[\text{M} + \text{Na}]^+$ : 515.2054, found: 515.2054

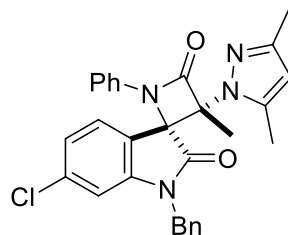

**3n**

**1'-benzyl-6'-chloro-3-(3,5-dimethyl-1H-pyrazol-1-yl)-3-methyl-1-phenylspiro[azetidine-2,3'-indoline]-2',4-dione**

**3n:** 88% yield, 91:9 *dr* (*cis:trans*), white solid, mp 154.1 - 158.2°C.

$^1\text{H}$  NMR (500 MHz,  $\text{CDCl}_3$ )  $\delta$  7.35 – 7.27 (m, 3H), 7.25 – 7.22 (m, 2H), 7.21 – 7.16 (m, 3H), 7.08 – 6.99 (m, 4H), 6.76 (s, 1H), 5.74 (s, 1H), 4.97 (d,  $J = 15.8$  Hz, 1H), 4.57 (d,  $J = 15.8$  Hz, 1H), 2.53 (s, 3H), 2.10 (s, 3H), 2.02 (s, 3H).

$^{13}\text{C}$  NMR (125 MHz,  $\text{CDCl}_3$ )  $\delta$  171.6, 163.4, 149.3, 145.2, 136.9, 135.9, 134.7, 129.5, 129.1 (two carbon signals overlapped), 128.1, 127.3, 127.1, 125.5, 122.7, 119.8, 117.6, 111.4, 107.1, 78.9, 70.4, 44.6, 22.3, 13.8, 13.4.

**HRMS-ESI:** calculated for  $\text{C}_{29}\text{H}_{25}\text{N}_4\text{O}_2$   $[\text{M} + \text{Na}]^+$ : 519.1558, found: 519.1559

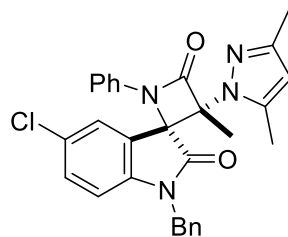

**3o**

**1'-benzyl-5'-chloro-3-(3,5-dimethyl-1H-pyrazol-1-yl)-3-methyl-1-phenylspiro[azetidine-2,3'-indoline]-2',4-dione**

**3o:** 86% yield, 93:7 *dr* (*cis:trans*), white solid, mp 219.2 - 220.5°C.

**<sup>1</sup>H NMR** (500 MHz, CDCl<sub>3</sub>) δ 7.32 – 7.28 (m, 2H), 7.25 – 7.16 (m, 7H), 7.09 – 7.01 (m, 3H), 6.67 (d, *J* = 8.2 Hz, 1H), 5.73 (s, 1H), 4.96 (d, *J* = 15.8 Hz, 1H), 4.58 (d, *J* = 15.8 Hz, 1H), 2.51 (s, 3H), 2.08 (s, 3H), 2.04 (s, 3H).

**<sup>13</sup>C NMR** (125 MHz, CDCl<sub>3</sub>) δ 171.1, 163.2, 149.2, 142.4, 135.8, 134.7, 130.8, 129.5, 129.0 (two carbon signals overlapped), 128.2, 127.9, 127.2, 126.4, 125.4, 123.2, 117.5, 111.6, 107.0, 78.8, 70.5, 44.5, 22.3, 13.7, 13.3.

**HRMS-ESI:** calculated for C<sub>29</sub>H<sub>25</sub>N<sub>4</sub>O<sub>2</sub> [M + Na]<sup>+</sup>: 519.1558, found: 519.1558

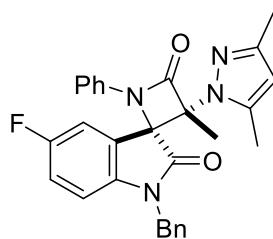

**3p**

**1'-benzyl-3-(3,5-dimethyl-1H-pyrazol-1-yl)-5'-fluoro-3-methyl-1-phenylspiro[azetidine-2,3'-indoline]-2',4-dione**

**3p:** 93% yield, 93:7 *dr* (*cis:trans*), white solid, mp 210.3 - 213.7°C.

**<sup>1</sup>H NMR** (500 MHz, CDCl<sub>3</sub>) δ 7.31 – 7.28 (m, 2H), 7.25 – 7.21 (m, 3H), 7.19 – 7.16 (m, 2H), 7.08 – 7.00 (m, 4H), 6.99 – 6.92 (m, 1H), 6.67 (dd, *J* = 8.5, 3.9 Hz, 1H), 5.73 (s, 1H), 4.99 (d, *J* = 15.8 Hz, 1H), 4.56 (d, *J* = 15.8 Hz, 1H), 2.52 (s, 3H), 2.09 (s, 3H), 2.04 (s, 3H).

**<sup>13</sup>C NMR** (125 MHz, CDCl<sub>3</sub>) δ 171.4, 163.4, 158.9 (d, *J* = 242.8 Hz), 149.3, 140.0, 135.9, 134.9, 129.5, 129.1 (two carbon signals overlapped), 128.0, 127.3, 125.5, 123.1 (d, *J* = 7.8 Hz), 117.6, 117.4 (d, *J* = 23.4 Hz), 114.3 (d, *J* = 25.5 Hz), 111.4 (d, *J* = 7.9 Hz), 107.1, 78.9, 70.8, 44.6, 22.3, 13.8, 13.4.

**<sup>19</sup>F NMR** (376 MHz, CDCl<sub>3</sub>) δ -119.44.

**HRMS-ESI:** calculated for C<sub>29</sub>H<sub>25</sub>N<sub>4</sub>O<sub>2</sub> [M + Na]<sup>+</sup>: 503.1854, found: 503.1854

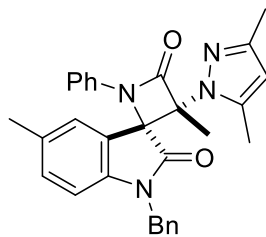

**3q**

**1'-benzyl-3-(3,5-dimethyl-1H-pyrazol-1-yl)-3,5'-dimethyl-1-phenylspiro[azetidine-2,3'-indoline]-2',4-dione**

**3q:** 90% yield, 94:6 *dr* (*cis:trans*), white solid, mp 204.5 - 206.8°C.

**<sup>1</sup>H NMR** (500 MHz, CDCl<sub>3</sub>) δ 7.34 – 7.30 (m, 2H), 7.27 – 7.26 (m, 3H), 7.22 – 7.19 (m, 2H), 7.11 – 7.06 (m, 7.6 Hz, 5H), 6.67 (d, *J* = 7.9 Hz, 1H), 5.76 (s, 1H), 5.01 (d, *J* = 15.8 Hz, 1H), 4.60 (d, *J* = 15.8 Hz, 1H), 2.56 (s, 3H), 2.27 (s, 3H), 2.12 (s, 3H), 2.07 (s, 3H).

**<sup>13</sup>C NMR** (125 MHz, CDCl<sub>3</sub>) δ 171.5, 163.7, 149.0, 141.6, 136.2, 135.4, 132.3, 131.3, 129.4, 128.9 (*two carbon signals overlapped*), 127.8, 127.4, 127.0, 125.2, 121.4, 117.7, 110.4, 107.0, 78.6, 70.9, 44.4, 22.3, 21.2, 13.8, 13.4.

**HRMS-ESI:** calculated for C<sub>30</sub>H<sub>28</sub>N<sub>4</sub>O<sub>2</sub> [M + Na]<sup>+</sup>: 499.2104, found: 499.2104

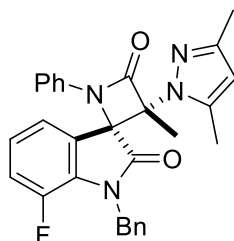

**3r**

**1'-benzyl-3-(3,5-dimethyl-1H-pyrazol-1-yl)-7'-fluoro-3-methyl-1-phenylspiro[azetidine-2,3'-indoline]-2',4-dione**

**3r:** 90% yield, 90:10 *dr* (*cis:trans*), white solid, mp 150.3 - 152.9°C.

**<sup>1</sup>H NMR** (400 MHz, CDCl<sub>3</sub>) δ 7.29 (s, 5H), 7.19 – 7.15 (m, 2H), 7.12 – 7.06 (m, 3H), 7.04 – 6.96 (m, 3H), 5.77 (s, 1H), 4.97 (d, *J* = 15.4 Hz, 1H), 4.89 (d, *J* = 15.4 Hz, 1H), 2.55 (s, 3H), 2.12 (s, 3H), 2.04 (s, 3H).

**<sup>13</sup>C NMR** (125 MHz, CDCl<sub>3</sub>) δ 171.4, 163.3, 149.3, 148.1 (d, *J* = 245.9 Hz), 136.5, 135.8, 130.7 (d, *J* = 9.3 Hz), 129.4, 128.7 (*two carbon signals overlapped*), 127.8 (d,

$J = 3.9$  Hz), 125.4, 124.5, 124.4, 123.4 (d,  $J = 6.4$  Hz), 122.3 (d,  $J = 3.2$  Hz), 119.3 (d,  $J = 19.6$  Hz), 117.7, 107.2, 79.0, 70.7, 46.0, 22.1, 13.8, 13.4.

$^{19}\text{F}$  NMR (376 MHz,  $\text{CDCl}_3$ )  $\delta$  -131.45.

**HRMS-ESI:** calculated for  $\text{C}_{29}\text{H}_{25}\text{FN}_4\text{O}_2$   $[\text{M} + \text{H}]^+$ : 481.2034, found: 481.2033

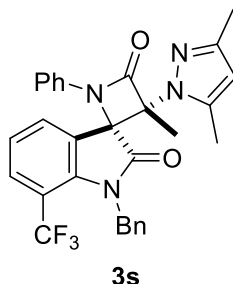

**1'-benzyl-3-(3,5-dimethyl-1H-pyrazol-1-yl)-3-methyl-1-phenyl-7'-(trifluoromethyl)spiro[azetidine-2,3'-indoline]-2',4-dione**

**3s:** 72% yield, 93:7 *dr* (*cis:trans*), white solid, mp 149.2 - 151.2°C.

$^1\text{H}$  NMR (500 MHz,  $\text{CDCl}_3$ )  $\delta$  7.70 (d,  $J = 8.1$  Hz, 1H), 7.49 (d,  $J = 7.4$  Hz, 1H), 7.25 – 7.15 (m, 6H), 7.13 – 7.03 (m, 5H), 5.74 (s, 1H), 5.17 (d,  $J = 16.9$  Hz, 1H), 4.89 (d,  $J = 16.9$  Hz, 1H), 2.52 (s, 3H), 2.14 (s, 3H), 2.03 (s, 3H).

$^{13}\text{C}$  NMR (125 MHz,  $\text{CDCl}_3$ )  $\delta$  173.1, 163.4, 149.4, 143.7, 142.6, 142.5, 135.8, 135.6, 129.6, 129.3 (q,  $J = 6.0$  Hz), 128.4, 127.1, 126.0, 125.6, 124.6, 123.2 (q,  $J = 270.1$  Hz), 122.1, 117.8, 114.4 (q,  $J = 33.4$  Hz), 107.3, 79.6, 69.4, 46.8 (q,  $J = 4.7$  Hz), 22.0, 13.8, 13.3.

$^{19}\text{F}$  NMR (376 MHz,  $\text{CDCl}_3$ )  $\delta$  -54.68.

**HRMS-ESI:** calculated for  $\text{C}_{30}\text{H}_{25}\text{F}_3\text{N}_4\text{O}_2$   $[\text{M} + \text{Na}]^+$ : 553.1822, found: 553.1823

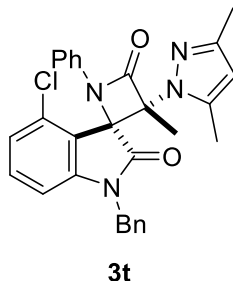

**1'-benzyl-4'-chloro-3-(3,5-dimethyl-1H-pyrazol-1-yl)-3-methyl-1-phenylspiro[azetidine-2,3'-indoline]-2',4-dione**

**3t:** 61% yield, 87:13 *dr* (*cis:trans*), white solid, mp 178.2 - 181.1°C.

**<sup>1</sup>H NMR** (400 MHz, CDCl<sub>3</sub>) δ 7.37 – 7.29 (m, 5H), 7.25 – 7.21 (m, 2H), 7.19 – 7.17 (m, 1H), 7.14 – 7.10 (m, 3H), 6.94 (d, *J* = 8.2 Hz, 1H), 6.67 (d, *J* = 7.9 Hz, 1H), 5.77 (s, 1H), 5.02 (d, *J* = 15.8 Hz, 1H), 4.56 (d, *J* = 15.8 Hz, 1H), 2.56 (s, 3H), 2.18 (s, 3H), 2.12 (s, 3H).

**<sup>13</sup>C NMR** (100 MHz, CDCl<sub>3</sub>) δ 171.0, 162.5, 149.2, 145.7, 136.8, 134.9, 131.9, 131.8, 129.5, 129.1 (*two carbon signals overlapped*), 128.0, 127.4, 125.4, 124.6, 119.4, 117.0, 109.1, 107.2, 81.7, 72.0, 44.7, 19.9, 13.8, 13.4.

**HRMS-ESI:** calculated for C<sub>29</sub>H<sub>25</sub>ClN<sub>4</sub>O<sub>2</sub> [*M* + *H*]<sup>+</sup>: 497.1739, found: 497.1738

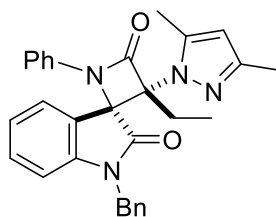

**4a**

**1'-benzyl-3-(3,5-dimethyl-1H-pyrazol-1-yl)-3-ethyl-1-phenylspiro[azetidine-2,3'-indoline]-2',4-dione**

**4a:** 65% yield, 90:10 *dr* (*cis:trans*), yellow solid, mp 197.9 - 200.5°C.

**<sup>1</sup>H NMR** (500 MHz, CDCl<sub>3</sub>) δ 7.34 – 7.27 (m, 7H), 7.18 (t, *J* = 7.8 Hz, 2H), 7.08 – 7.01 (m, 4H), 6.76 (d, *J* = 7.9 Hz, 1H), 5.75 (s, 1H), 5.05 (d, *J* = 15.9 Hz, 1H), 4.60 (d, *J* = 15.9 Hz, 1H), 2.60 – 2.53 (m, 4H), 2.41 (dt, *J* = 13.7, 6.9 Hz, 1H), 2.12 (s, 3H), 0.98 (t, *J* = 7.2 Hz, 3H).

**<sup>13</sup>C NMR** (125 MHz, CDCl<sub>3</sub>) δ 172.0, 163.4, 149.3, 144.8, 144.2, 136.2, 135.3, 130.9, 129.4, 129.0, 127.8, 127.3, 126.6, 125.1, 122.6, 121.4, 117.7, 110.7, 106.6, 81.4, 70.5, 44.5, 29.8, 13.9, 13.4, 8.6.

**HRMS-ESI:** calculated for C<sub>30</sub>H<sub>28</sub>N<sub>4</sub>O<sub>2</sub> [*M* + *H*]<sup>+</sup>: 477.2285, found: 477.2284

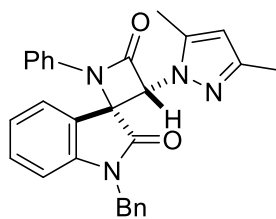

**4b**



**1'-benzyl-3-(3,5-dimethyl-1H-pyrazol-1-yl)-1-phenylspiro[azetidine-2,3'-indoline]-2',4-dione**

**4b:** 63% yield, 90:10 *dr* (*cis:trans*), yellow solid, mp 204.5 - 206.1°C.

**<sup>1</sup>H NMR** (400 MHz, CDCl<sub>3</sub>) δ 7.36 – 7.26 (m, 5H), 7.23 – 7.18 (m, 2H), 7.17 – 7.03 (m, 6H), 6.81 (d, *J* = 7.9 Hz, 1H), 6.00 (s, 1H), 5.84 (s, 1H), 5.12 (d, *J* = 15.7 Hz, 1H), 4.66 (d, *J* = 15.7 Hz, 1H), 2.45 (s, 3H), 2.17 (s, 3H).

**<sup>13</sup>C NMR** (100 MHz, CDCl<sub>3</sub>) δ 170.4, 159.8, 150.0, 143.0, 142.5, 136.0, 135.0, 131.0, 129.5, 129.0, 128.0, 127.3, 125.5, 123.9, 123.5, 123.3, 117.5, 110.5, 107.8, 76.2, 67.3, 44.4, 13.7, 12.3.

**HRMS-ESI:** calculated for C<sub>28</sub>H<sub>24</sub>N<sub>4</sub>O<sub>2</sub> [M + H]<sup>+</sup>: 449.1972, found: 449.1971

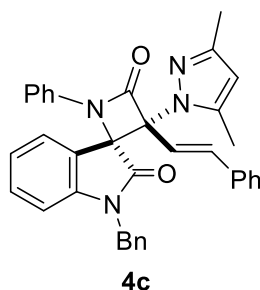

**1'-benzyl-3-(3,5-dimethyl-1H-pyrazol-1-yl)-1-phenyl-3-((E)-styryl)spiro[azetidine-2,3'-indoline]-2',4-dione**

**4c:** 85% yield, 70:30 *dr* (*cis:trans*), white solid, mp 164.2 - 166.3°C.

**<sup>1</sup>H NMR** (500 MHz, CDCl<sub>3</sub>) δ 7.40 – 7.37 (m, 2H), 7.35 – 7.32 (m, 4H), 7.31 – 7.26 (m, 5H), 7.21 – 7.12 (m, 6H), 7.09 – 7.05 (m, 1H), 6.97 – 6.93 (m, 1H), 6.83 (d, *J* = 7.9 Hz, 1H), 6.70 (d, *J* = 16.3 Hz, 1H), 5.78 (s, 1H), 5.02 (d, *J* = 15.7 Hz, 1H), 4.75 (d, *J* = 15.7 Hz, 1H), 2.57 (s, 3H), 2.12 (s, 3H).

**<sup>13</sup>C NMR** (125 MHz, CDCl<sub>3</sub>) δ 171.5, 160.7, 149.3, 144.1, 142.9, 136.2, 135.8, 135.4, 133.6, 131.1, 129.4, 129.0, 128.8, 128.7, 127.9, 127.6, 127.3, 127.2, 125.4, 124.6, 122.6, 121.0, 117.9, 110.6, 107.3, 82.1, 70.4, 44.6, 13.9, 13.2.

**HRMS-ESI:** calculated for C<sub>36</sub>H<sub>30</sub>N<sub>4</sub>O<sub>2</sub> [M + H]<sup>+</sup>: 551.2442, found: 551.2442

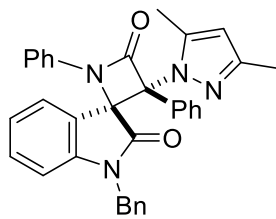

**5a**

**1'-benzyl-3-(3,5-dimethyl-1H-pyrazol-1-yl)-1,3-diphenylspiro[azetidine-2,3'-indoline]-2',4-dione**

**5a:** 92% yield, 90:10 *dr* (*trans:cis*), white solid, mp 199.2 - 201.8°C.

**<sup>1</sup>H NMR** (400 MHz, CDCl<sub>3</sub>) δ 7.55 – 7.51 (m, 2H), 7.40 – 7.36 (m, 2H), 7.35 – 7.27 (m, 4H), 7.25 – 7.18 (m, 3H), 7.15 – 7.08 (m, 4H), 7.06 – 6.94 (m, 2H), 6.76 (td, *J* = 7.6, 0.6 Hz, 1H), 6.35 – 6.30 (m, 1H), 5.63 (s, 1H), 5.10 (d, *J* = 15.2 Hz, 1H), 4.90 (d, *J* = 15.2 Hz, 1H), 2.16 (s, 3H), 1.38 (s, 3H).

**<sup>13</sup>C NMR** (125 MHz, CDCl<sub>3</sub>) δ 172.3, 161.0, 147.6, 143.1, 141.4, 136.7, 135.4, 132.0, 131.1, 129.5, 129.2, 129.1, 129.0, 128.4, 128.3, 127.9, 126.4, 125.1, 123.4, 122.6, 118.0, 109.5, 108.4, 86.5, 72.0, 44.8, 13.8, 12.8.

**HRMS-ESI:** calculated for C<sub>34</sub>H<sub>28</sub>N<sub>4</sub>O<sub>2</sub> [M + H]<sup>+</sup>: 525.2285, found: 525.2285

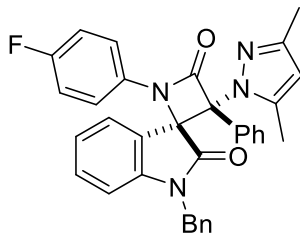

**5b**

**1'-benzyl-3-(3,5-dimethyl-1H-pyrazol-1-yl)-1-(4-fluorophenyl)-3-phenylspiro[azetidine-2,3'-indoline]-2',4-dione**

**5b:** 92% yield, 89:11 *dr* (*trans:cis*), white solid, mp 216.8 - 218.6°C.

**<sup>1</sup>H NMR** (500 MHz, CDCl<sub>3</sub>) δ 7.52 (d, *J* = 7.6 Hz, 2H), 7.37 – 7.27 (m, 7H), 7.24 – 7.21 (m, 2H), 7.11 – 7.07 (m, 2H), 6.99 (d, *J* = 7.9 Hz, 1H), 6.84 – 6.77 (m, 3H), 6.31 (d, *J* = 7.5 Hz, 1H), 5.65 (s, 1H), 5.10 (d, *J* = 15.2 Hz, 1H), 4.90 (d, *J* = 15.2 Hz, 1H), 2.18 (s, 3H), 1.36 (s, 3H).

**<sup>13</sup>C NMR** (125 MHz, CDCl<sub>3</sub>) δ 172.3, 161.0, 159.8 (d, *J* = 245.0 Hz), 147.7, 143.2, 141.4, 135.4, 132.9 (d, *J* = 2.8 Hz), 131.8, 131.3, 129.4, 129.1, 129.1, 128.4, 128.4,

127.9, 126.4, 123.5, 122.4, 120.0 (d,  $J = 8.1$  Hz), 116.1 (d,  $J = 22.8$  Hz), 109.6, 108.5, 86.8, 72.3, 44.8, 13.8, 12.8.

$^{19}\text{F}$  NMR (376 MHz,  $\text{CDCl}_3$ )  $\delta$  -116.22.

HRMS-ESI: calculated for  $\text{C}_{34}\text{H}_{27}\text{FN}_4\text{O}_2$   $[\text{M} + \text{H}]^+$ : 543.2191, found: 543.2191

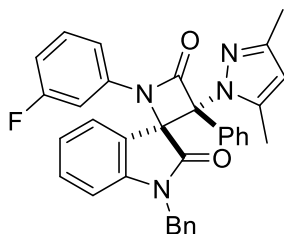

5c

**1'-benzyl-3-(3,5-dimethyl-1H-pyrazol-1-yl)-1-(3-fluorophenyl)-3-phenylspiro[azetidine-2,3'-indoline]-2',4-dione**

5c: 92% yield, 91:9 *dr* (*trans*:*cis*), yellow solid, mp 201.3 - 203.5°C.

$^1\text{H}$  NMR (500 MHz,  $\text{CDCl}_3$ )  $\delta$  7.51 (d,  $J = 7.5$  Hz, 2H), 7.41 – 7.38 (m, 2H), 7.37 – 7.27 (m, 5H), 7.24 – 7.20 (m, 2H), 7.08 – 7.04 (m, 1H), 7.03 – 6.98 (m, 2H), 6.81 – 6.77 (m, 2H), 6.75 – 6.71 (m, 1H), 6.30 (d,  $J = 7.4$  Hz, 1H), 5.65 (s, 1H), 5.12 (d,  $J = 15.2$  Hz, 1H), 4.92 (d,  $J = 15.2$  Hz, 1H), 2.19 (s, 3H), 1.33 (s, 3H).

$^{13}\text{C}$  NMR (101 MHz,  $\text{CDCl}_3$ )  $\delta$  172.2, 163.0 (d,  $J = 246.4$  Hz), 161.2, 147.8, 143.2, 141.5, 138.1 (d,  $J = 10.5$  Hz), 135.4, 131.8, 131.5, 130.7 (d,  $J = 9.2$  Hz), 129.5, 129.3, 129.2, 128.5, 128.1, 126.5, 123.6, 122.2, 113.4 (d,  $J = 2.9$  Hz), 112.1 (d,  $J = 21.3$  Hz), 109.8, 108.6, 105.9 (d,  $J = 26.3$  Hz), 100.2, 87.0, 72.3, 45.0, 13.9, 12.9.

$^{19}\text{F}$  NMR (376 MHz,  $\text{CDCl}_3$ )  $\delta$  -110.49.

HRMS-ESI: calculated for  $\text{C}_{34}\text{H}_{27}\text{FN}_4\text{O}_2$   $[\text{M} + \text{Na}]^+$ : 565.2010, found: 565.2010

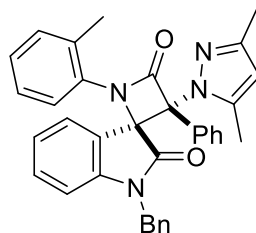

5d

**1'-benzyl-3-(3,5-dimethyl-1H-pyrazol-1-yl)-3-phenyl-1-(o-tolyl)spiro[azetidine-2,3'-indoline]-2',4-dione**

**5d**: 91% yield, 93:7 *dr* (*trans*:*cis*), yellow solid, mp 153.4 - 155.6°C.

**<sup>1</sup>H NMR** (400 MHz, CDCl<sub>3</sub>) δ 7.60 – 7.55 (m, 2H), 7.29 – 7.17 (m, 10H), 7.15 – 7.10 (m, 1H), 6.98 – 6.89 (m, 2H), 6.85 – 6.78 (m, 2H), 6.35 (d, *J* = 7.4 Hz, 1H), 5.68 (s, 1H), 4.99 (d, *J* = 15.5 Hz, 1H), 4.92 (d, *J* = 15.5 Hz, 1H), 2.59 (s, 3H), 2.24 (s, 3H), 1.36 (s, 3H).

**<sup>13</sup>C NMR** (100 MHz, CDCl<sub>3</sub>) δ 173.36, 161.69, 147.29, 143.71, 141.36, 136.89, 135.19, 133.81, 132.17, 131.57, 131.08, 129.67, 128.99, 128.93, 128.34, 128.04, 127.81, 126.74, 126.18, 125.17, 123.23, 123.01, 109.27, 108.42, 100.10, 86.43, 74.82, 44.53, 19.45, 13.76, 12.96.

**HRMS-ESI**: calculated for C<sub>35</sub>H<sub>30</sub>N<sub>4</sub>O<sub>2</sub> [M + H]<sup>+</sup>: 539.2442, found: 539.2442

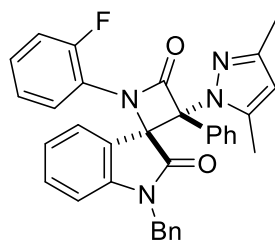

**5e**

**1'-benzyl-3-(3,5-dimethyl-1H-pyrazol-1-yl)-1-(2-fluorophenyl)-3-phenylspiro[azetidine-2,3'-indoline]-2',4-dione**

**5e**: 93% yield, 90:10 *dr* (*trans*:*cis*), yellow solid, mp 164.9 - 168.1°C.

**<sup>1</sup>H NMR** (500 MHz, CDCl<sub>3</sub>) δ 8.10 – 8.04 (m, 1H), 7.55 – 7.51 (m, 2H), 7.36 – 7.29 (m, 5H), 7.25 – 7.17 (m, 4H), 7.11 – 7.06 (m, 2H), 6.90 – 6.84 (m, 2H), 6.74 (t, *J* = 7.6 Hz, 1H), 6.37 (d, *J* = 7.4 Hz, 1H), 5.63 (s, 1H), 5.03 (d, *J* = 15.4 Hz, 1H), 4.84 (d, *J* = 15.4 Hz, 1H), 2.17 (s, 3H), 1.37 (s, 3H).

**<sup>13</sup>C NMR** (125 MHz, CDCl<sub>3</sub>) δ 172.98, 162.20, 153.44 (d, *J* = 248.8 Hz), 147.58, 143.79, 141.41, 135.55, 132.20, 130.79, 129.42, 129.06, 128.98, 128.10, 128.06, 127.90, 127.34 (d, *J* = 7.6 Hz), 125.90, 125.04 (d, *J* = 1.8 Hz), 124.85 (d, *J* = 3.5 Hz), 123.82 (d, *J* = 2.1 Hz), 123.46, 122.97, 116.54 (d, *J* = 20.1 Hz), 109.06, 108.34, 87.65, 74.41, 44.81, 13.76, 12.76.

**<sup>19</sup>F NMR** (376 MHz, CDCl<sub>3</sub>) δ -121.85.

**HRMS-ESI**: calculated for C<sub>34</sub>H<sub>27</sub>FN<sub>4</sub>O<sub>2</sub> [M + Na]<sup>+</sup>: 565.2010, found: 565.2010

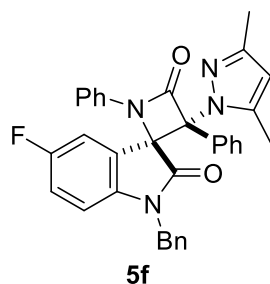

**1'-benzyl-3-(3,5-dimethyl-1H-pyrazol-1-yl)-5'-fluoro-1,3-diphenylspiro[azetidine-2,3'-indoline]-2',4-dione**

**5f**: 95% yield, 91:9 *dr* (*trans*:*cis*), white solid, mp 204.7 - 207.3°C.

**<sup>1</sup>H NMR** (500 MHz, CDCl<sub>3</sub>) δ 7.55 (d, *J* = 7.4 Hz, 2H), 7.38 – 7.32 (m, 5H), 7.30 – 7.24 (m, 3H), 7.17 – 7.10 (m, 4H), 7.05 (t, *J* = 7.1 Hz, 1H), 6.98 (td, *J* = 8.7, 2.5 Hz, 1H), 6.90 (dd, *J* = 8.6, 4.0 Hz, 1H), 6.11 (dd, *J* = 8.0, 2.4 Hz, 1H), 5.70 (s, 1H), 5.11 (d, *J* = 15.3 Hz, 1H), 4.89 (d, *J* = 15.3 Hz, 1H), 2.17 (s, 3H), 1.49 (s, 3H).

**<sup>13</sup>C NMR** (125 MHz, CDCl<sub>3</sub>) δ 172.1, 160.8, 159.3 (d, *J* = 242.8 Hz), 147.9, 141.5, 139.0, 139.0, 136.5, 135.1, 131.8, 129.4, 129.3, 129.2, 129.1, 128.4, 128.4, 128.0, 125.3, 124.5 (d, *J* = 8.5 Hz), 118.0, 117.4 (d, *J* = 23.8 Hz), 114.3 (d, *J* = 26.0 Hz), 110.2 (d, *J* = 7.8 Hz), 108.6, 86.8, 72.0, 44.9, 13.7, 13.0.

**<sup>19</sup>F NMR** (376 MHz, CDCl<sub>3</sub>) δ -119.24.

**HRMS-ESI**: calculated for C<sub>34</sub>H<sub>27</sub>FN<sub>4</sub>O<sub>2</sub> [M + H]<sup>+</sup> : 543.2191, found: 543.2191

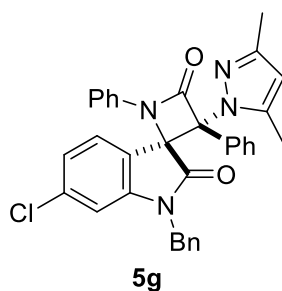

**1'-benzyl-6'-chloro-3-(3,5-dimethyl-1H-pyrazol-1-yl)-1,3-diphenylspiro[azetidine-2,3'-indoline]-2',4-dione**

**5g**: 95% yield, 88:12 *dr* (*trans*:*cis*), white solid, mp 224.5 - 226.6°C.

**<sup>1</sup>H NMR** (500 MHz, CDCl<sub>3</sub>) δ 7.53 (d, *J* = 7.5 Hz, 2H), 7.40 – 7.35 (m, 5H), 7.30 (t, *J* = 7.3 Hz, 1H), 7.26 – 7.22 (m, 2H), 7.18 – 7.14 (m, 2H), 7.13 – 7.09 (m, 2H), 7.08 –

7.04 (m, 1H), 6.99 (d,  $J = 1.3$  Hz, 1H), 6.79 – 6.75 (m, 1H), 6.28 (d,  $J = 8.0$  Hz, 1H), 5.70 – 5.66 (m, 1H), 5.07 (d,  $J = 15.3$  Hz, 1H), 4.90 (d,  $J = 15.3$  Hz, 1H), 2.16 (s, 3H), 1.51 (s, 3H).

$^{13}\text{C}$  NMR (125 MHz,  $\text{CDCl}_3$ )  $\delta$  172.2, 160.8, 147.8, 144.3, 141.5, 137.0, 136.5, 134.9, 131.9, 129.4, 129.3, 129.2, 129.2, 128.5, 128.4, 128.0, 127.2, 125.3, 123.3, 121.2, 118.0, 110.2, 108.5, 86.7, 71.7, 44.9, 13.7, 13.1.

**HRMS-ESI:** calculated for  $\text{C}_{34}\text{H}_{27}\text{ClN}_4\text{O}_2$   $[\text{M} + \text{H}]^+$ : 559.1895, found: 559.1895

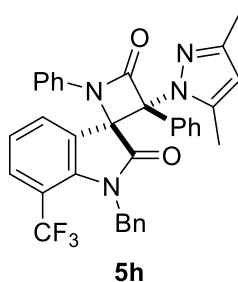

**1'-benzyl-3-(3,5-dimethyl-1H-pyrazol-1-yl)-1,3-diphenyl-7'-(trifluoromethyl)spiro[azetidine-2,3'-indoline]-2',4-dione**

**5h:** 82% yield, 90:10 *dr* (*trans:cis*), white solid, mp 95.8 - 96.2°C.

$^1\text{H}$  NMR (500 MHz,  $\text{CDCl}_3$ )  $\delta$  7.64 (d,  $J = 8.0$  Hz, 1H), 7.48 – 7.43 (m, 2H), 7.27 – 7.23 (m, 6H), 7.21 – 7.16 (m, 4H), 7.16 – 7.12 (m, 2H), 7.10 – 7.05 (m, 1H), 6.88 (t,  $J = 7.8$  Hz, 1H), 6.76 (d,  $J = 7.3$  Hz, 1H), 5.66 (s, 1H), 5.27 – 5.20 (m, 2H), 2.09 (s, 3H), 1.69 (s, 3H).

$^{13}\text{C}$  NMR (125 MHz,  $\text{CDCl}_3$ )  $\delta$  173.0, 160.7, 148.0, 141.9, 141.6, 135.9, 135.7, 132.1, 129.4, 129.3, 129.1, 129.0, 128.9 (q,  $J = 6.0$  Hz), 128.5, 128.0, 127.6, 127.3, 126.5, 125.6, 123.5 (q,  $J = 273.4$  Hz), 122.6, 118.4, 113.3 (q,  $J = 32.9$  Hz), 108.2, 87.5, 70.4, 46.6, 13.6, 12.8.

$^{19}\text{F}$  NMR (376 MHz,  $\text{CDCl}_3$ )  $\delta$  -54.84.

**HRMS-ESI:** calculated for  $\text{C}_{35}\text{H}_{27}\text{F}_3\text{N}_4\text{O}_2$   $[\text{M} + \text{Na}]^+$ : 615.1978, found: 615.1978

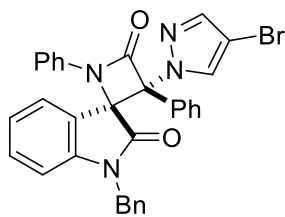

**5i**

**1'-benzyl-3-(4-bromo-1H-pyrazol-1-yl)-1,3-diphenylspiro[azetidine-2,3'-indoline]-2',4-dione**

**5i:** 86% yield, > 95:5 *dr* (*trans:cis*), white solid, mp 194.3 - 196.1°C.

**<sup>1</sup>H NMR** (400 MHz, CDCl<sub>3</sub>) δ 7.71 – 7.61 (m, 2H), 7.51 (d, *J* = 12.6 Hz, 2H), 7.43 – 7.28 (m, 9H), 7.20 – 7.01 (m, 6H), 6.86 – 6.79 (m, 1H), 6.75 – 6.65 (m, 1H), 4.95 – 4.82 (m, 2H).

**<sup>13</sup>C NMR** (100 MHz, CDCl<sub>3</sub>) δ 171.7, 160.6, 143.3, 141.0, 136.2, 135.3, 132.5, 131.6, 130.0, 129.9, 129.4, 129.0, 128.8, 128.6, 128.3, 128.1, 125.6, 125.6, 123.5, 121.2, 118.0, 110.1, 94.5, 85.2, 72.7, 44.8.

**HRMS-ESI:** calculated for C<sub>32</sub>H<sub>23</sub>BrN<sub>4</sub>O<sub>2</sub> [*M* + Na]<sup>+</sup>: 597.0897, found: 597.0897

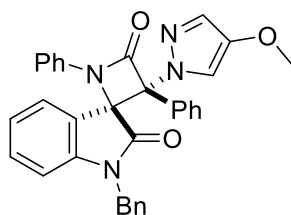

**5j**

**1'-benzyl-3-(4-methoxy-1H-pyrazol-1-yl)-1,3-diphenylspiro[azetidine-2,3'-indoline]-2',4-dione**

**5j:** 91% yield, 95:5 *dr* (*trans:cis*), white solid, mp 196.6 - 199.1°C.

**<sup>1</sup>H NMR** (400 MHz, CDCl<sub>3</sub>) δ 7.71 – 7.64 (m, 2H), 7.38 – 7.27 (m, 10H), 7.19 – 7.12 (m, 5H), 7.08 – 7.03 (m, 1H), 7.03 – 6.98 (m, 1H), 6.83 – 6.78 (m, 1H), 6.76 – 6.69 (m, 1H), 4.93 – 4.83 (m, 2H), 3.60 (s, 3H).

**<sup>13</sup>C NMR** (100 MHz, CDCl<sub>3</sub>) δ 171.8, 161.1, 147.2, 143.1, 136.3, 135.8, 132.9, 131.2, 129.5, 129.2, 128.9, 128.8, 128.6, 128.4, 128.2, 127.9, 125.7, 125.3, 123.2, 121.5, 117.9, 114.0, 109.8, 85.3, 72.8, 58.9, 44.7.

**HRMS-ESI:** calculated for C<sub>33</sub>H<sub>26</sub>N<sub>4</sub>O<sub>3</sub> [*M* + H]<sup>+</sup>: 527.2078, found: 527.2078

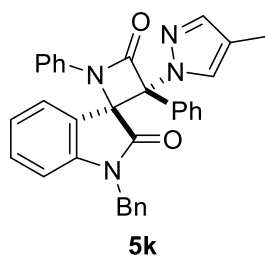

**1'-benzyl-3-(4-methyl-1H-pyrazol-1-yl)-1,3-diphenylspiro[azetidine-2,3'-indoline]-2',4-dione**

**5k:** 90% yield, 93:7 *dr* (*trans:cis*), yellow solid, mp 174.8 - 177.3°C.

**<sup>1</sup>H NMR** (500 MHz, CDCl<sub>3</sub>) δ 7.69 (d, *J* = 7.3 Hz, 2H), 7.38 – 7.29 (m, 10H), 7.18 – 7.13 (m, 4H), 7.08 – 7.04 (m, 1H), 7.01 (d, *J* = 7.9 Hz, 1H), 6.78 (t, *J* = 7.6 Hz, 1H), 6.70 (d, *J* = 7.4 Hz, 1H), 4.93 – 4.85 (m, 2H), 1.94 (s, 3H).

**<sup>13</sup>C NMR** (125 MHz, CDCl<sub>3</sub>) δ 172.0, 161.5, 143.2, 141.1, 136.5, 135.5, 133.2, 131.2, 129.5, 129.3, 129.0, 128.6, 128.6, 128.3, 128.2, 128.1, 125.9, 125.3, 123.2, 121.6, 117.9, 117.0, 109.9, 85.1, 72.9, 44.7, 8.9.

**HRMS-ESI:** calculated for C<sub>33</sub>H<sub>26</sub>N<sub>4</sub>O<sub>2</sub> [M + H]<sup>+</sup>: 511.2129, found: 511.2129

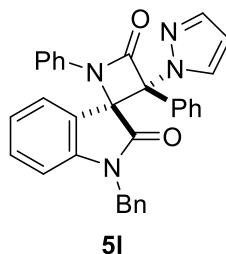

**1'-benzyl-1,3-diphenyl-3-(1H-pyrazol-1-yl)spiro[azetidine-2,3'-indoline]-2',4-dione**

**5l:** 90% yield, > 95:5 *dr* (*trans:cis*), yellow solid, mp 199.1 - 201.9°C.

**<sup>1</sup>H NMR** (500 MHz, CDCl<sub>3</sub>) δ 7.74 – 7.70 (m, 2H), 7.56 – 7.52 (m, 2H), 7.37 – 7.28 (m, 9H), 7.19 – 7.14 (m, 4H), 7.09 – 7.05 (m, 1H), 7.01 (d, *J* = 7.9 Hz, 1H), 6.75 (t, *J* = 7.6 Hz, 1H), 6.62 (d, *J* = 7.4 Hz, 1H), 6.21 – 6.17 (m, 1H), 4.92 (d, *J* = 15.3 Hz, 1H), 4.87 (d, *J* = 15.2 Hz, 1H).

**<sup>13</sup>C NMR** (125 MHz, CDCl<sub>3</sub>) δ 171.9, 161.3, 143.2, 140.5, 136.4, 135.5, 133.1, 131.3, 129.8, 129.6, 129.3, 129.0, 128.7, 128.5, 128.3, 128.2, 125.6, 125.4, 123.3, 121.5, 118.0, 109.9, 106.6, 85.0, 72.8, 44.8.



**HRMS-ESI:** calculated for C<sub>32</sub>H<sub>24</sub>N<sub>4</sub>O<sub>2</sub> [M + Na]<sup>+</sup>: 519.1791, found: 519.1792

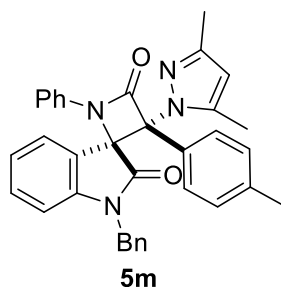

**1'-benzyl-3-(3,5-dimethyl-1H-pyrazol-1-yl)-1-phenyl-3-(p-tolyl)spiro[azetidine-2,3'-indoline]-2',4-dione**

**5m:** 95% yield, 90:10 *dr* (*trans:cis*), white solid, mp 180.0 - 182.3°C.

**<sup>1</sup>H NMR** (500 MHz, CDCl<sub>3</sub>) δ 7.47 – 7.43 (m, 2H), 7.43 – 7.39 (m, 2H), 7.38 – 7.33 (m, 3H), 7.32 – 7.28 (m, 1H), 7.16 – 7.12 (m, 4H), 7.07 – 7.02 (m, 3H), 6.99 (d, *J* = 7.9 Hz, 1H), 6.78 (t, *J* = 7.5 Hz, 1H), 6.35 (d, *J* = 7.3 Hz, 1H), 5.66 (s, 1H), 5.14 (d, *J* = 15.2 Hz, 1H), 4.93 (d, *J* = 15.2 Hz, 1H), 2.30 (s, 3H), 2.19 (s, 3H), 1.42 (s, 3H).

**<sup>13</sup>C NMR** (125 MHz, CDCl<sub>3</sub>) δ 172.3, 161.2, 147.5, 143.1, 141.3, 138.9, 136.8, 135.5, 131.0, 129.3, 129.2, 129.0, 129.0, 128.6, 128.4, 128.3, 126.3, 125.0, 123.3, 122.7, 118.0, 109.5, 108.3, 86.5, 72.0, 44.8, 21.3, 13.8, 12.8.

**HRMS-ESI:** calculated for C<sub>35</sub>H<sub>30</sub>N<sub>4</sub>O<sub>2</sub> [M + H]<sup>+</sup>: 539.2442, found: 539.2442

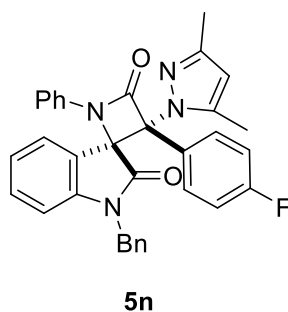

**1'-benzyl-3-(3,5-dimethyl-1H-pyrazol-1-yl)-3-(4-fluorophenyl)-1-phenylspiro[azetidine-2,3'-indoline]-2',4-dione**

**5n:** 93% yield, 88:12 *dr* (*trans:cis*), white solid, mp 218.1 - 223.2°C.

**<sup>1</sup>H NMR** (500 MHz, CDCl<sub>3</sub>) δ 7.55 (dd, *J* = 8.7, 5.2 Hz, 2H), 7.42 – 7.39 (m, 2H), 7.37 – 7.29 (m, 4H), 7.17 – 7.12 (m, 4H), 7.08 – 7.04 (m, 1H), 7.03 – 7.00 (m, 1H),

6.91 (t,  $J = 8.6$  Hz, 2H), 6.79 (t,  $J = 7.6$  Hz, 1H), 6.37 (d,  $J = 7.5$  Hz, 1H), 5.67 (s, 1H), 5.10 (d,  $J = 15.2$  Hz, 1H), 4.93 (d,  $J = 15.2$  Hz, 1H), 2.15 (s, 3H), 1.51 (s, 3H).

$^{13}\text{C}$  NMR (125 MHz,  $\text{CDCl}_3$ )  $\delta$  172.1, 162.9 (d,  $J = 249.2$  Hz), 160.8, 147.8, 143.1, 141.3, 136.5, 135.4, 131.4 (d,  $J = 8.3$  Hz), 131.2, 129.3, 129.1, 128.4, 128.4, 128.2 (d,  $J = 3.3$  Hz), 126.2, 125.3, 123.4, 122.6, 118.0, 114.9 (d,  $J = 21.7$  Hz), 109.5, 108.4, 85.7, 72.1, 44.8, 13.7, 12.8.

$^{19}\text{F}$  NMR (376 MHz,  $\text{CDCl}_3$ )  $\delta$  -112.13.

HRMS-ESI: calculated for  $\text{C}_{34}\text{H}_{27}\text{FN}_4\text{O}_2$   $[\text{M} + \text{H}]^+$  : 543.2191, found: 543.2191

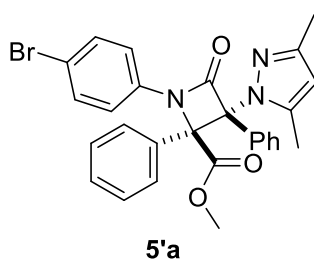

**Methyl-1-(4-bromophenyl)-3-(3,5-dimethyl-1H-pyrazol-1-yl)-4-oxo-2,3-diphenylazetidine-2-carboxylate**

**5'a**: 78% yield, 90:10 *dr* (*trans*:*cis*), light yellow oil.

$^1\text{H}$  NMR (500 MHz,  $\text{CDCl}_3$ )  $\delta$  7.36 – 7.33 (m, 3H), 7.32 – 7.27 (m, 8H), 7.18 – 7.15 (m, 1H), 7.09 – 7.06 (m, 2H), 5.40 (s, 1H), 3.44 (s, 3H), 1.98 (s, 3H), 1.76 (s, 3H).

$^{13}\text{C}$  NMR (125 MHz,  $\text{CDCl}_3$ )  $\delta$  168.7, 160.0, 148.4, 141.2, 135.8, 134.1, 131.7, 130.5, 129.2, 129.0, 128.5, 128.3, 127.6, 127.3, 120.5, 117.6, 108.1, 100.0, 87.1, 78.8, 52.6, 29.7, 13.5, 13.0.

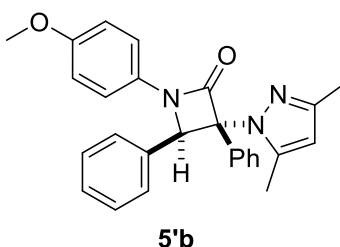

**3-(3,5-dimethyl-1H-pyrazol-1-yl)-1-(4-methoxyphenyl)-3,4-diphenylazetidin-2-one**

**5'b**: 46% yield, >95:5 *dr* (*trans*:*cis*), light yellow oil.

**<sup>1</sup>H NMR** (500 MHz, CDCl<sub>3</sub>) δ 7.40 – 7.37 (m, 2H), 7.19 – 7.16 (m, 2H), 7.06 – 7.03 (m, 3H), 7.03 – 7.01 (m, 4H), 6.89 – 6.86 (m, 2H), 6.83 – 6.80 (m, 2H), 5.88 (s, 1H), 3.75 (s, 3H), 2.32 (s, 3H), 2.10 (s, 3H).

**<sup>13</sup>C NMR** (125 MHz, CDCl<sub>3</sub>) δ 162.3, 156.5, 147.4, 142.1, 135.3, 133.6, 130.8, 128.1, 128.0, 127.9, 127.8, 127.7, 127.6, 127.3, 119.2, 114.3, 108.1, 83.0, 64.7, 55.4, 29.7, 13.8, 11.9.

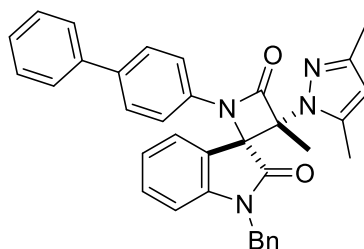

**6a**

**1-([1,1'-biphenyl]-4-yl)-1'-benzyl-3-(3,5-dimethyl-1H-pyrazol-1-yl)-3-methylspiro[azetidine-2,3'-indoline]-2',4-dione**

**6a**: 84% yield, yellow solid, mp 198.3 - 200.6°C.

**<sup>1</sup>H NMR** (500 MHz, CDCl<sub>3</sub>) δ 7.47 (d, *J* = 7.3 Hz, 2H), 7.44 – 7.37 (m, 4H), 7.35 – 7.28 (m, 8H), 7.16 (d, *J* = 8.6 Hz, 2H), 7.06 (t, *J* = 7.5 Hz, 1H), 6.81 (d, *J* = 7.9 Hz, 1H), 5.78 (s, 1H), 5.05 (d, *J* = 15.8 Hz, 1H), 4.63 (d, *J* = 15.8 Hz, 1H), 2.59 (s, 3H), 2.13 (s, 3H), 2.09 (s, 3H).

**<sup>13</sup>C NMR** (125 MHz, CDCl<sub>3</sub>) δ 171.6, 163.7, 149.2, 144.1, 140.3, 138.3, 135.2, 131.0, 129.0 (*two carbon signals overlapped*), 128.9, 128.1, 127.9, 127.5, 127.4, 127.0, 126.4, 122.8, 121.4, 118.0, 110.8, 107.1, 100.1, 78.8, 70.9, 44.5, 22.3, 13.8, 13.5.

**HRMS-ESI**: calculated for C<sub>35</sub>H<sub>30</sub>N<sub>4</sub>O<sub>2</sub> [M + Na]<sup>+</sup>: 561.2261, found: 561.2260

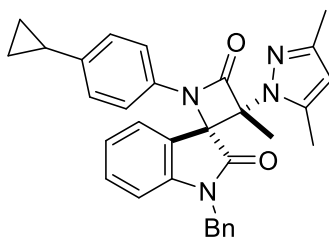

**6b**

**1'-benzyl-1-(4-cyclopropylphenyl)-3-(3,5-dimethyl-1H-pyrazol-1-yl)-3-methylspiro[azetidine-2,3'-indoline]-2',4-dione**

**6b**: 78% yield, white solid, mp 124.6 - 126.3°C.

**<sup>1</sup>H NMR** (400 MHz, CDCl<sub>3</sub>) δ 7.35 – 7.31 (m, 2H), 7.29 – 7.25 (m, 5H), 7.05 – 6.96 (m, 3H), 6.91 – 6.87 (m, 2H), 6.78 – 6.75 (m, 1H), 5.76 (s, 1H), 5.04 (d, *J* = 15.8 Hz, 1H), 4.59 (d, *J* = 15.8 Hz, 1H), 2.57 (s, 3H), 2.12 (s, 3H), 2.06 (s, 3H), 1.79 (td, *J* = 8.4, 4.2 Hz, 1H), 0.92 – 0.88 (m, 2H), 0.61 – 0.55 (m, 2H).

**<sup>13</sup>C NMR** (100 MHz, CDCl<sub>3</sub>) δ 171.7, 163.4, 149.1, 144.0, 141.3, 135.3, 133.5, 130.9, 129.0, 127.8, 127.4, 126.6, 126.3, 122.6, 121.6, 117.8, 110.6, 107.0, 78.7, 70.9, 44.4, 29.8, 22.2, 15.1, 13.8, 13.4, 9.2.

**HRMS-ESI**: calculated for C<sub>32</sub>H<sub>30</sub>N<sub>4</sub>O<sub>2</sub> [M + H]<sup>+</sup>: 503.2442, found: 503.2442

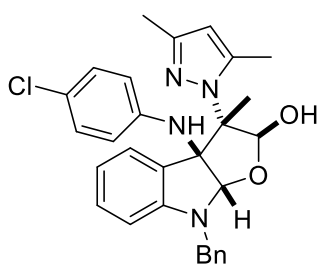

**7**

**8-benzyl-3a-((4-chlorophenyl)amino)-3-(3,5-dimethyl-1H-pyrazol-1-yl)-3-methyl-3,3a,8,8a-tetrahydro-2H-furo[2,3-b]indol-2-ol**

**7**: 88% yield, yellow solid, mp 177.8 - 180.1°C.

**<sup>1</sup>H NMR** (500 MHz, DMSO) δ 7.62 (s, 1H), 7.47 – 7.39 (m, 4H), 7.34 – 7.30 (m, 1H), 6.99 – 6.95 (m, 1H), 6.84 (d, *J* = 8.8 Hz, 2H), 6.53 (d, *J* = 7.9 Hz, 1H), 6.45 (d, *J* = 8.8 Hz, 2H), 6.25 (t, *J* = 7.4 Hz, 1H), 5.80 (s, 1H), 5.61 (d, *J* = 3.5 Hz, 1H), 5.38 (s, 1H), 5.17 (d, *J* = 7.0 Hz, 1H), 4.69 (d, *J* = 15.2 Hz, 1H), 4.50 (d, *J* = 15.2 Hz, 1H), 2.21 (s, 3H), 1.86 (s, 6H).

**<sup>13</sup>C NMR** (125 MHz, DMSO) δ 152.0, 145.4, 141.3, 138.3, 130.1, 129.1 (*two carbon signals overlapped*), 128.7, 128.6, 127.8, 125.4, 124.8, 122.0, 118.1, 117.6, 107.3, 105.9, 94.7, 93.9, 75.6, 74.9, 48.0, 19.4, 13.8, 13.2.

**HRMS-ESI**: calculated for C<sub>29</sub>H<sub>29</sub>ClN<sub>4</sub>O<sub>2</sub> [M + H]<sup>+</sup>: 501.2052, found: 501.2052

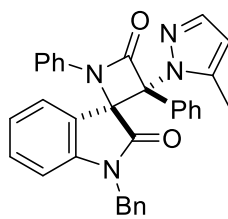

**8**

**1'-benzyl-3-(5-methyl-1H-pyrazol-1-yl)-1,3-diphenylspiro[azetidine-2,3'-indoline]-2',4-dione**

**8**: 91% yield, 90:10 *dr* (*trans*:*cis*), white solid, mp 232.3 - 234.7°C.

**<sup>1</sup>H NMR** (500 MHz, CDCl<sub>3</sub>) δ 7.56 (d, *J* = 7.8 Hz, 2H), 7.47 (s, 1H), 7.44 – 7.40 (m, 2H), 7.38 – 7.28 (m, 5H), 7.26 – 7.22 (m, 2H), 7.16 – 7.12 (m, 4H), 7.07 – 7.02 (m, 2H), 6.77 (t, *J* = 7.6 Hz, 1H), 6.23 (d, *J* = 7.5 Hz, 1H), 5.88 (s, 1H), 5.15 (d, *J* = 15.1 Hz, 1H), 4.94 (d, *J* = 15.1 Hz, 1H), 1.44 (s, 3H).

**<sup>13</sup>C NMR** (125 MHz, CDCl<sub>3</sub>) δ 172.3, 160.8, 143.1, 140.8, 138.7, 136.6, 135.4, 131.6, 131.3, 129.5, 129.2, 129.2, 129.1, 128.5, 128.4, 128.0, 126.3, 125.2, 123.5, 122.3, 118.0, 109.6, 108.4, 86.6, 71.9, 44.9, 12.8.

**HRMS-ESI**: calculated for C<sub>33</sub>H<sub>26</sub>N<sub>4</sub>O<sub>2</sub> [M + Na]<sup>+</sup>: 533.1948, found: 533.1948

## 8. NMR spectra of compounds 1, 1', 3, 4, 5, 5', 6, 7, 8

$^1\text{H}$  NMR (400 MHz,  $\text{CDCl}_3$ ) and  $^{13}\text{C}$  NMR (125 MHz,  $\text{CDCl}_3$ ) spectra for 1a

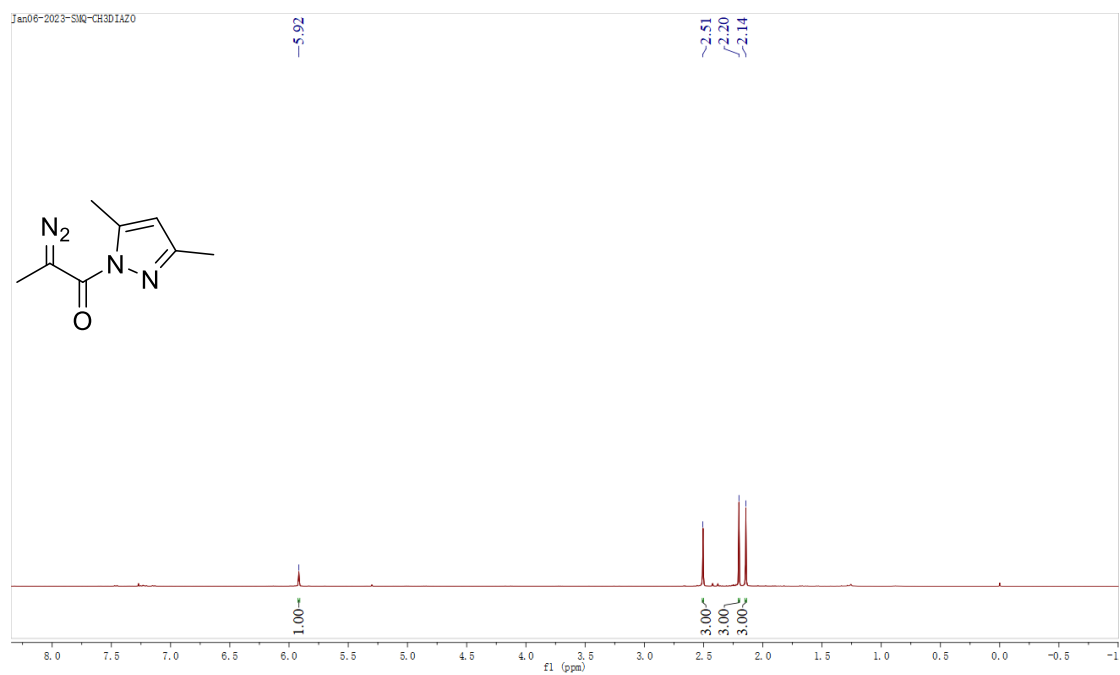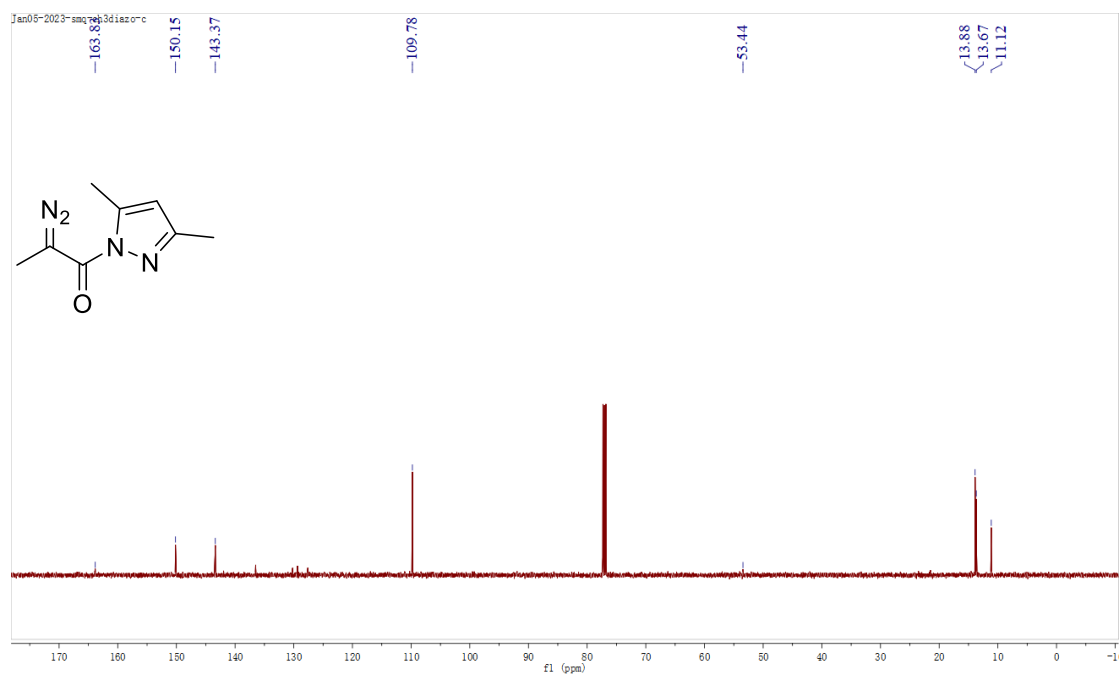

**<sup>1</sup>H NMR (500 MHz, CDCl<sub>3</sub>) and <sup>13</sup>C NMR (125 MHz, CDCl<sub>3</sub>) spectra for 1b**

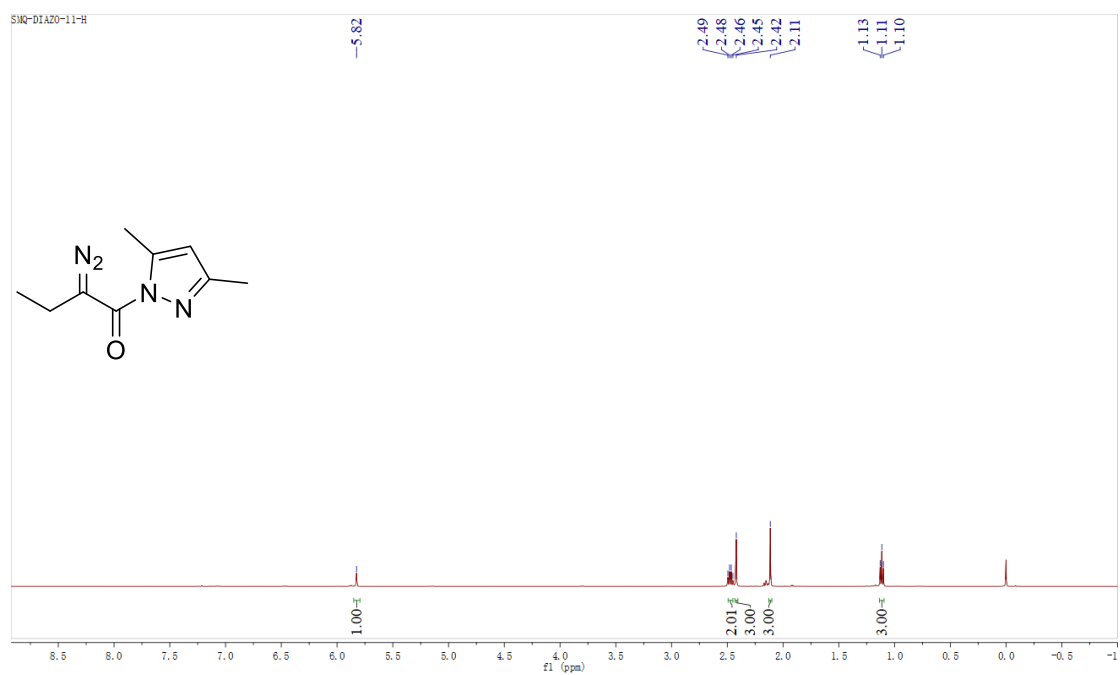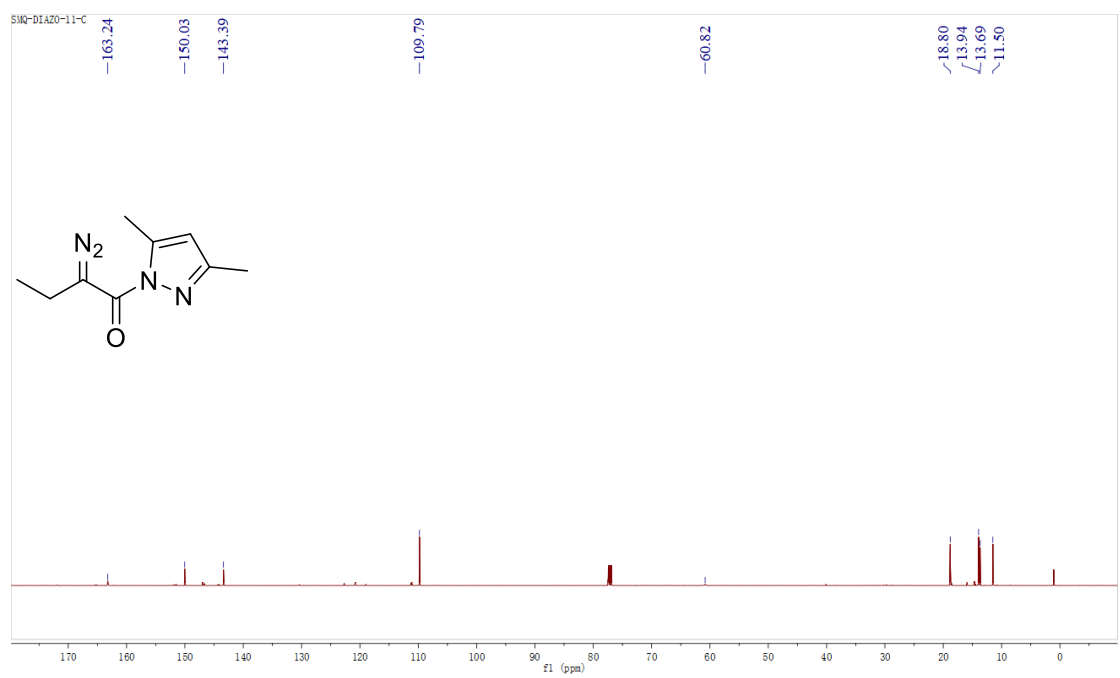

**<sup>1</sup>H NMR (500 MHz, CDCl<sub>3</sub>) and <sup>13</sup>C NMR (125 MHz, CDCl<sub>3</sub>) spectra for 1c**

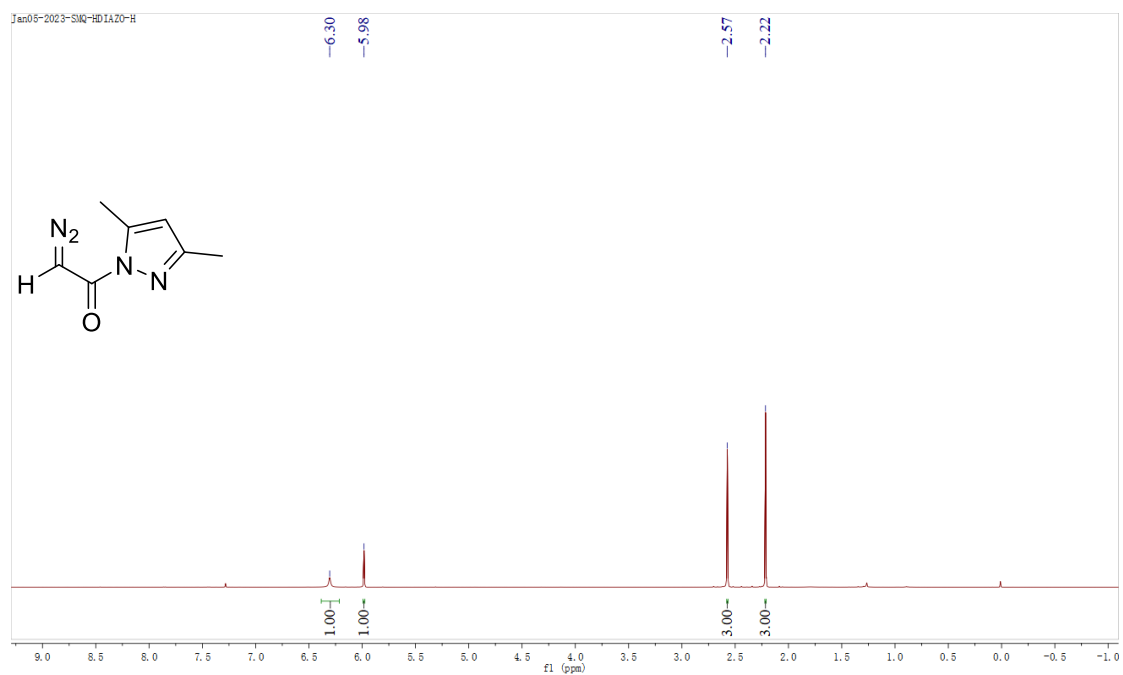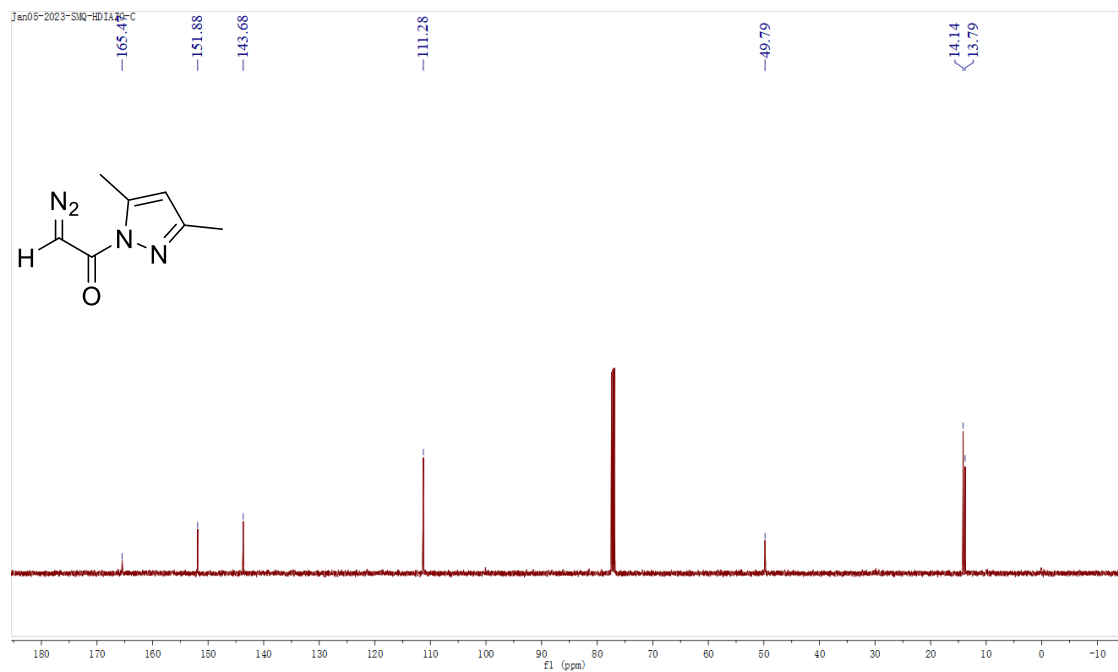



**<sup>1</sup>H NMR (400 MHz, CDCl<sub>3</sub>) and <sup>13</sup>C NMR (100 MHz, CDCl<sub>3</sub>) spectra for 1'a**

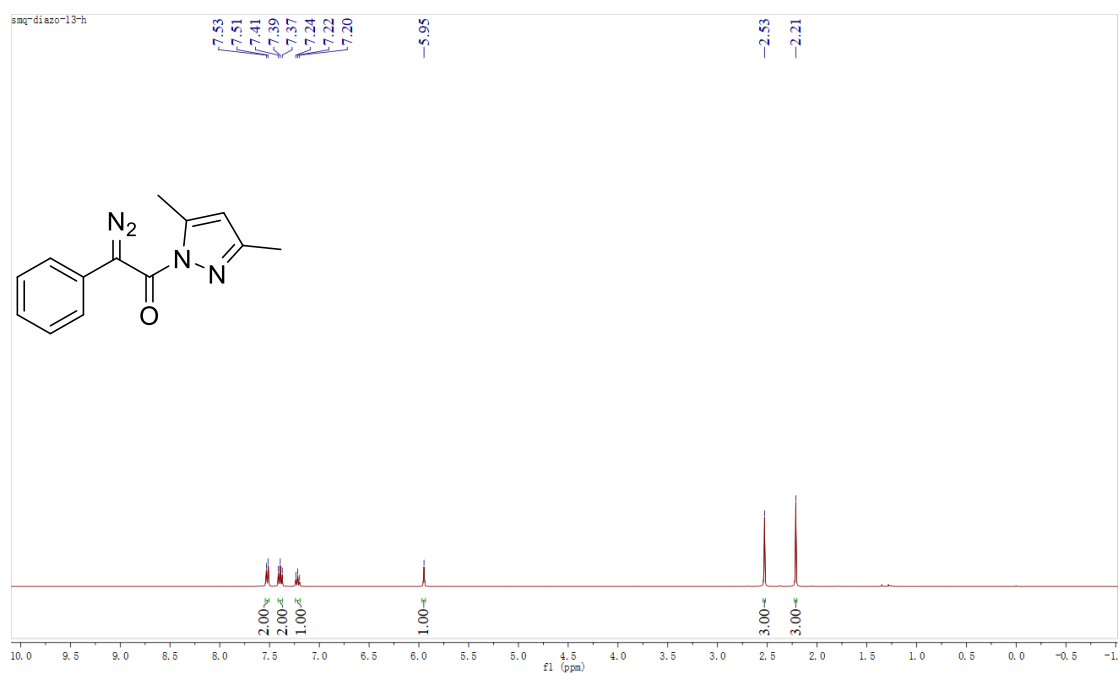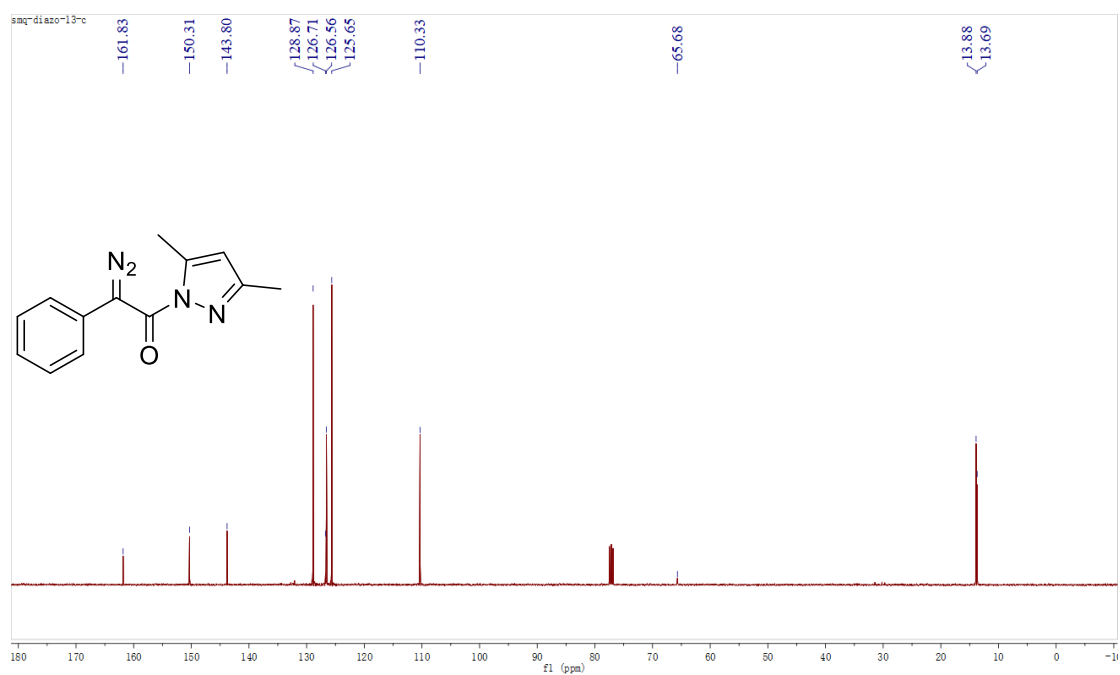

**<sup>1</sup>H NMR (500 MHz, CDCl<sub>3</sub>) and <sup>13</sup>C NMR (125 MHz, CDCl<sub>3</sub>) spectra for 1'b**

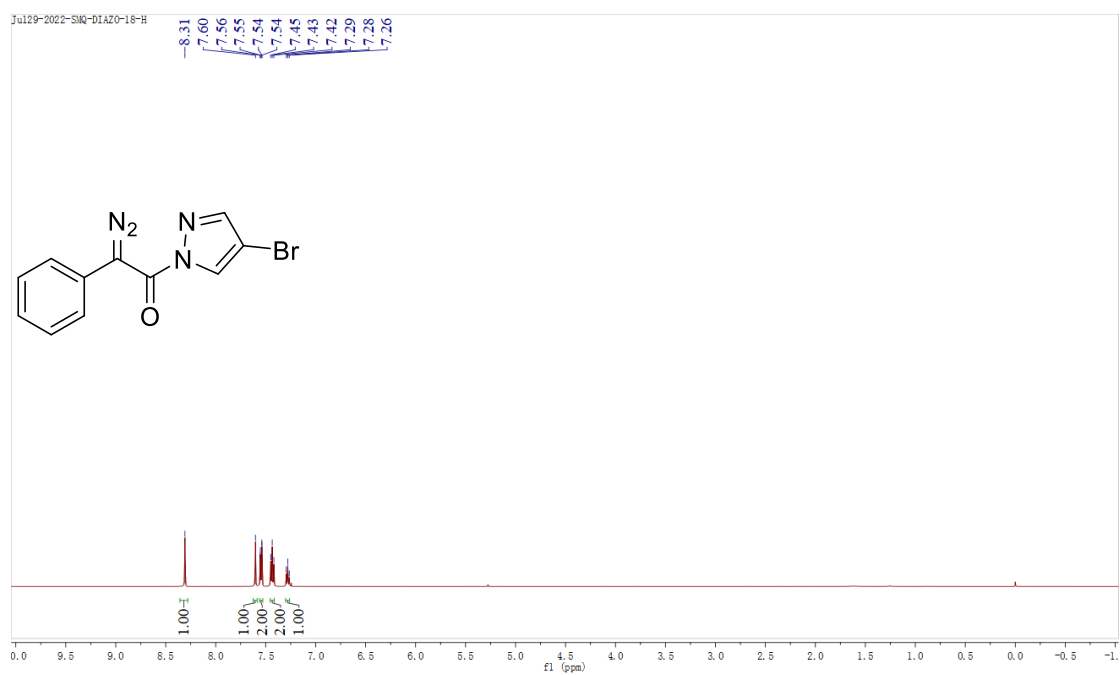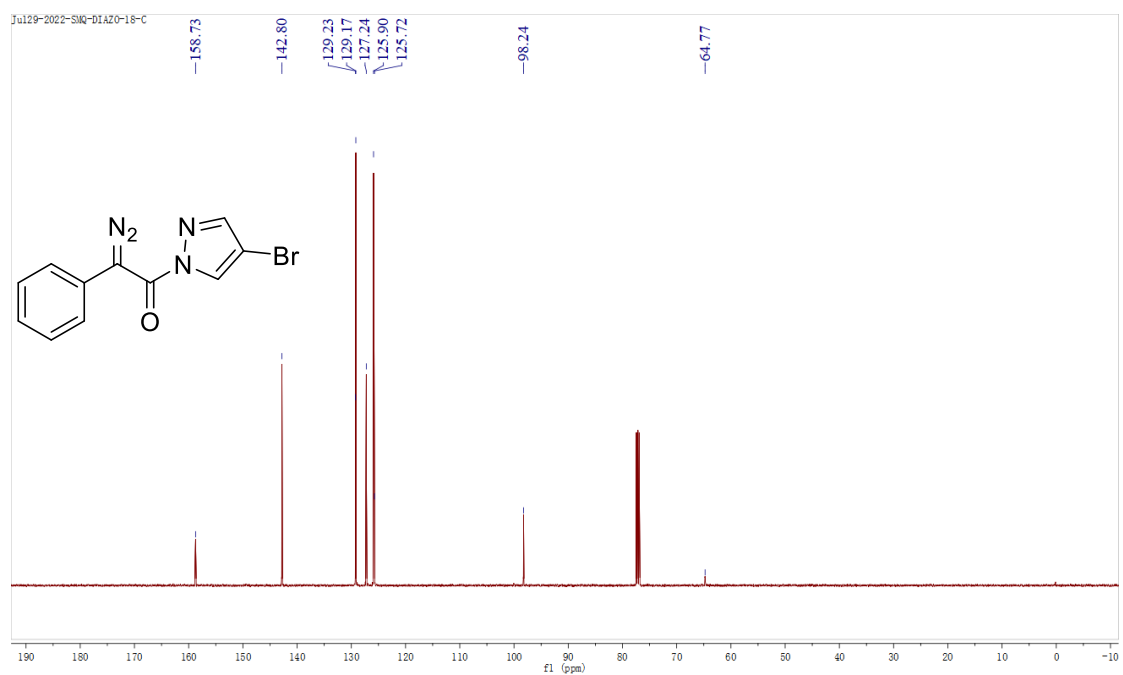

**<sup>1</sup>H NMR (500 MHz, CDCl<sub>3</sub>) and <sup>13</sup>C NMR (125 MHz, CDCl<sub>3</sub>) spectra for 1'c**

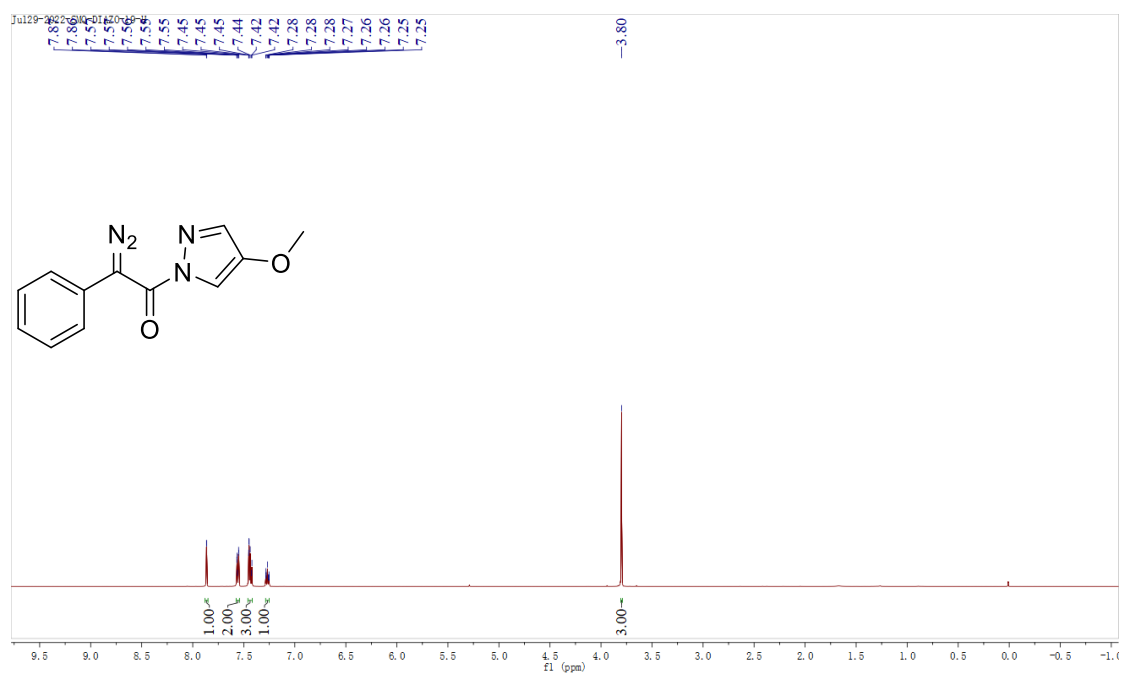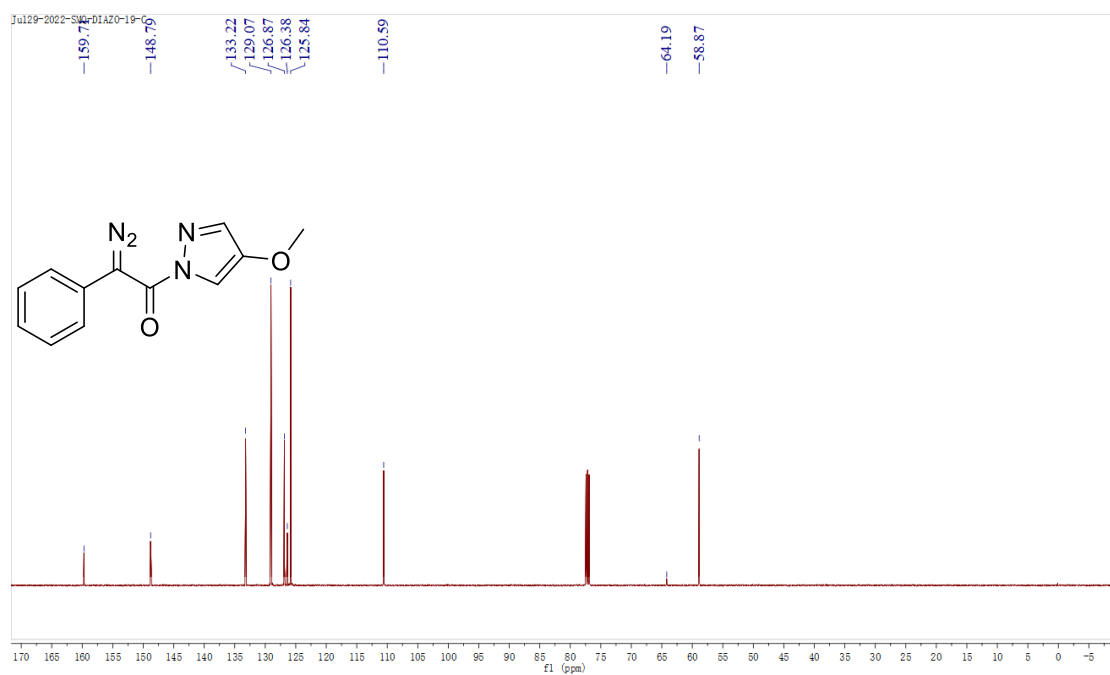

**<sup>1</sup>H NMR (400 MHz, CDCl<sub>3</sub>) and <sup>13</sup>C NMR (100 MHz, CDCl<sub>3</sub>) spectra for 1'd**

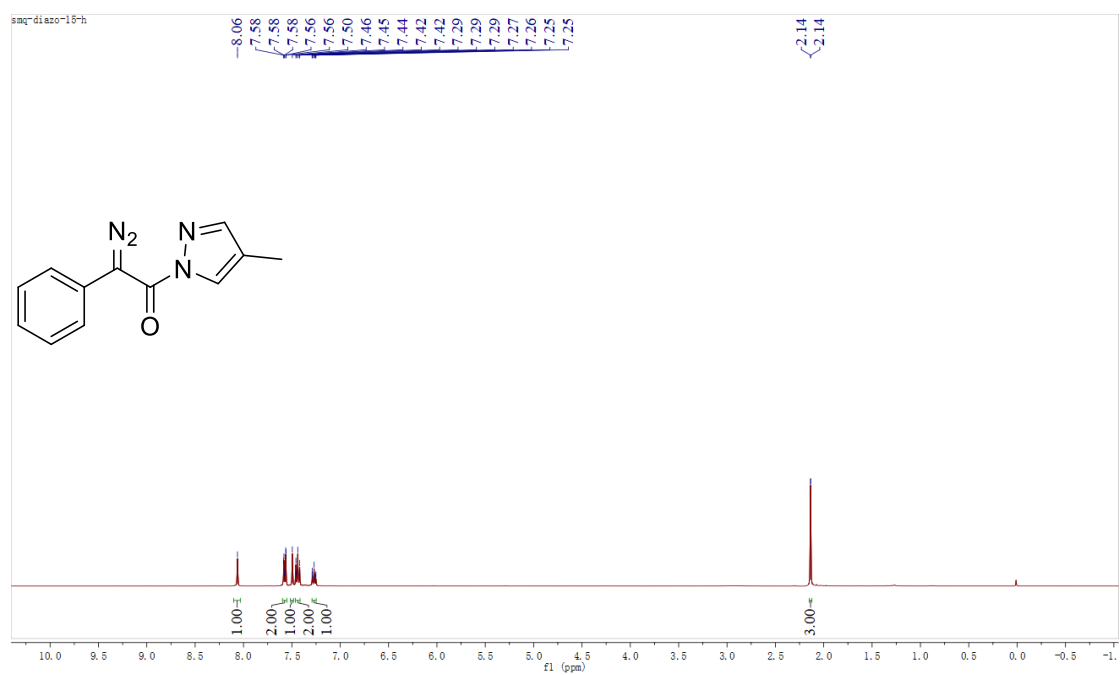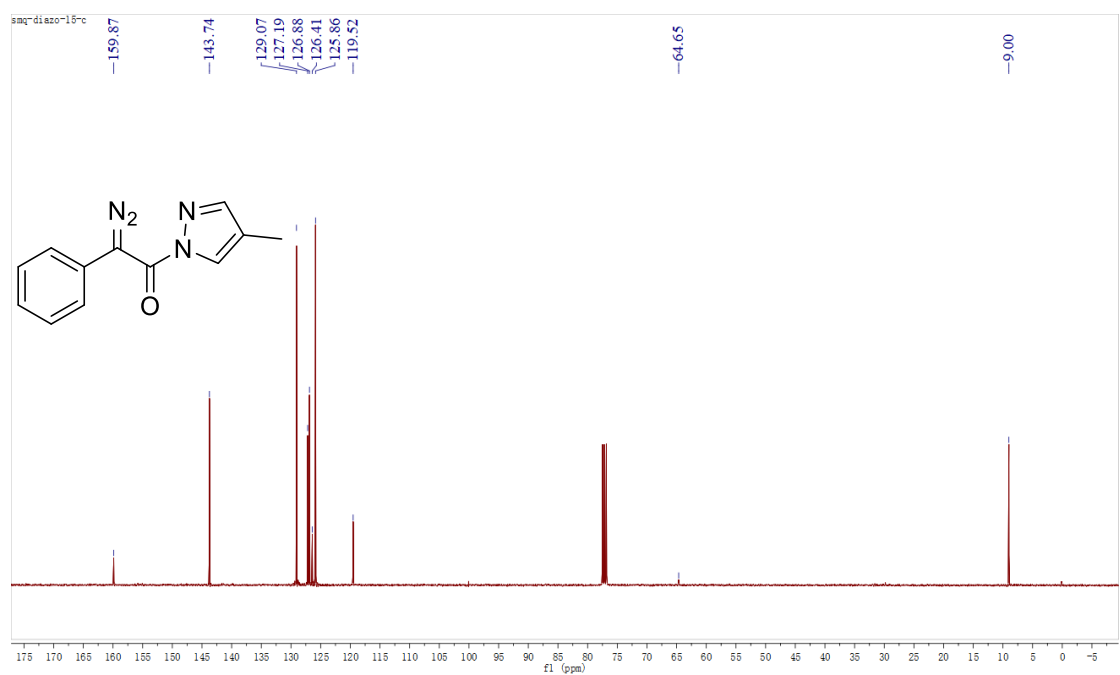

**<sup>1</sup>H NMR (500 MHz, CDCl<sub>3</sub>) and <sup>13</sup>C NMR (125 MHz, CDCl<sub>3</sub>) spectra for 1'e**

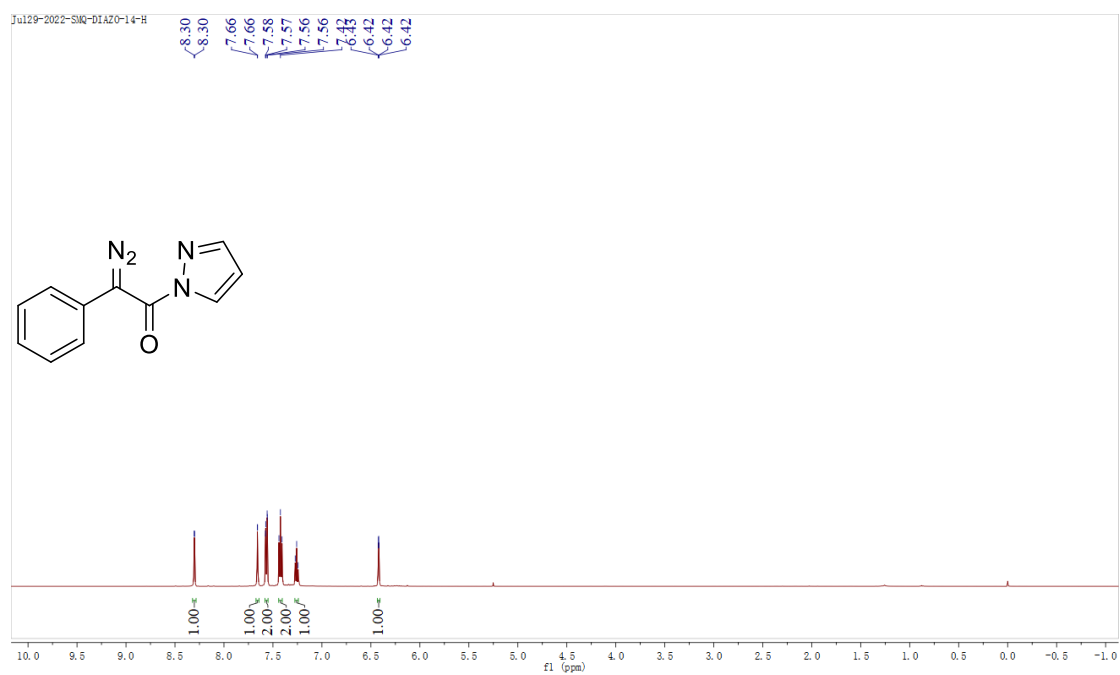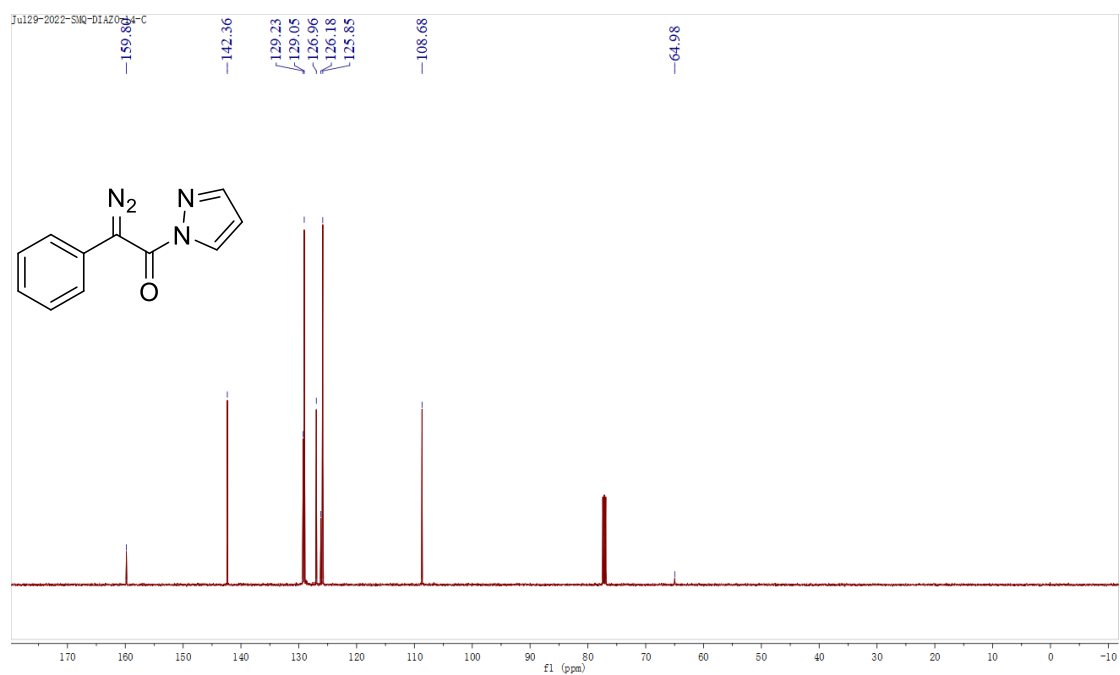

**<sup>1</sup>H NMR (500 MHz, CDCl<sub>3</sub>) and <sup>13</sup>C NMR (125 MHz, CDCl<sub>3</sub>) spectra for 1'f**

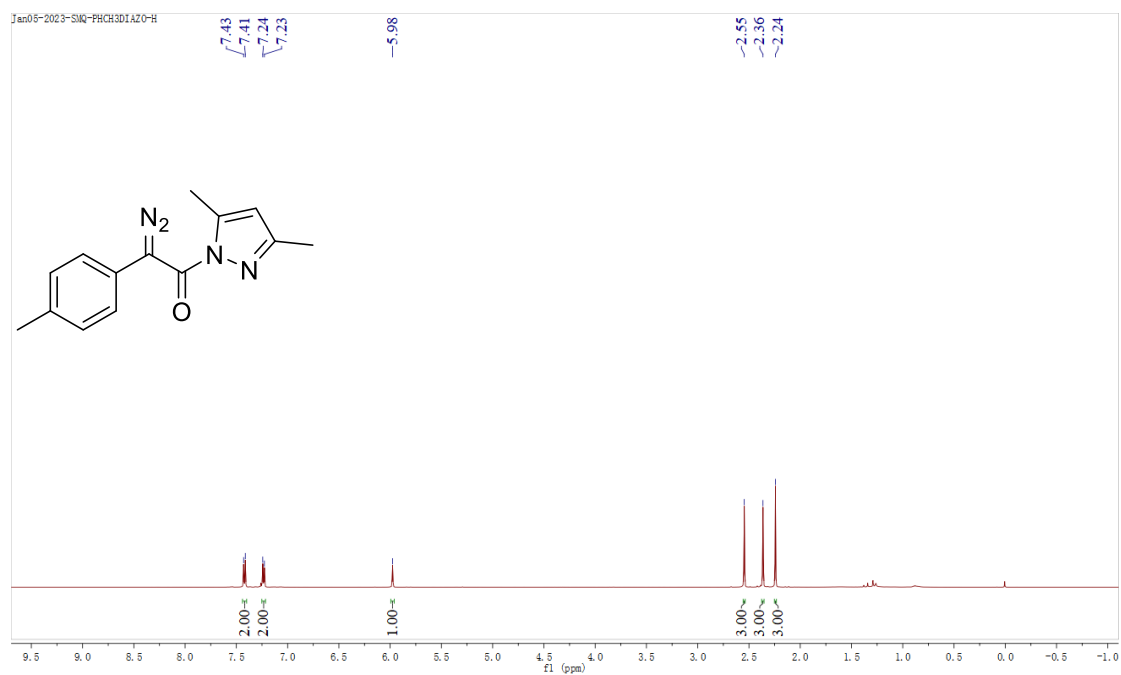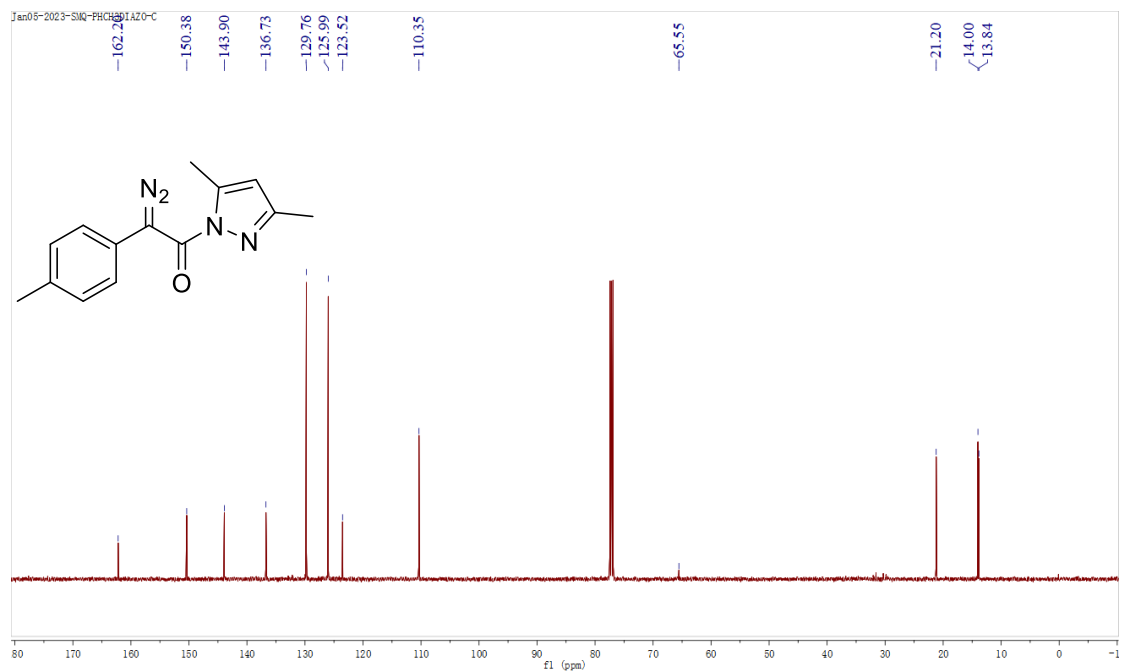

**<sup>1</sup>H NMR (400 MHz, CDCl<sub>3</sub>) and <sup>13</sup>C NMR (125 MHz, CDCl<sub>3</sub>) spectra for 1'g**

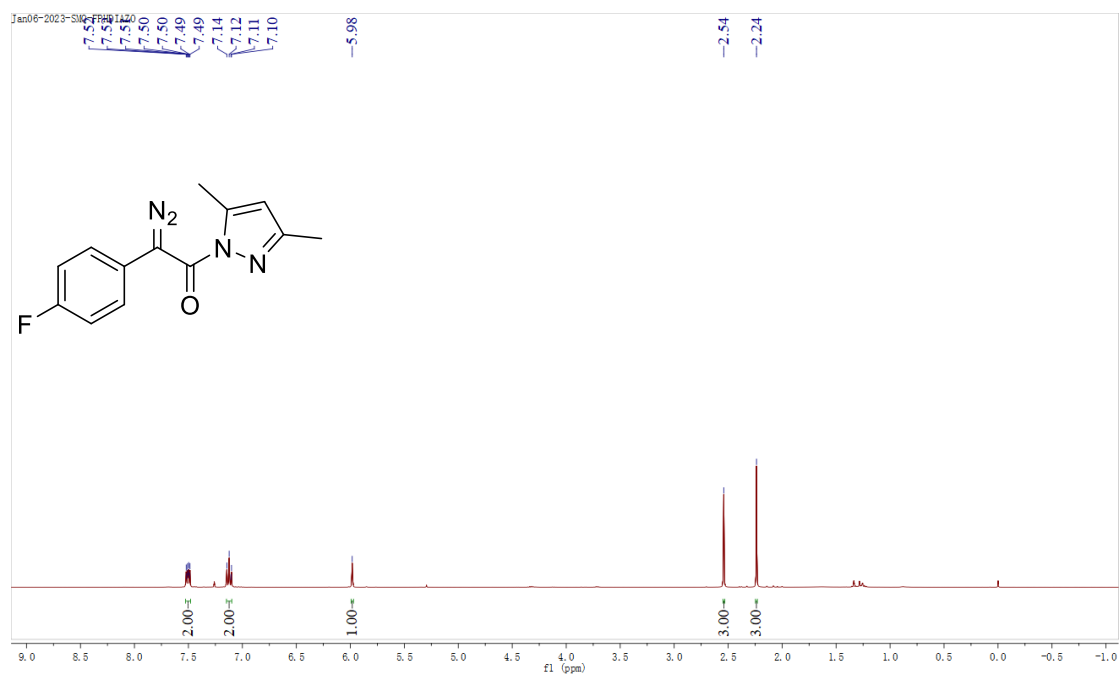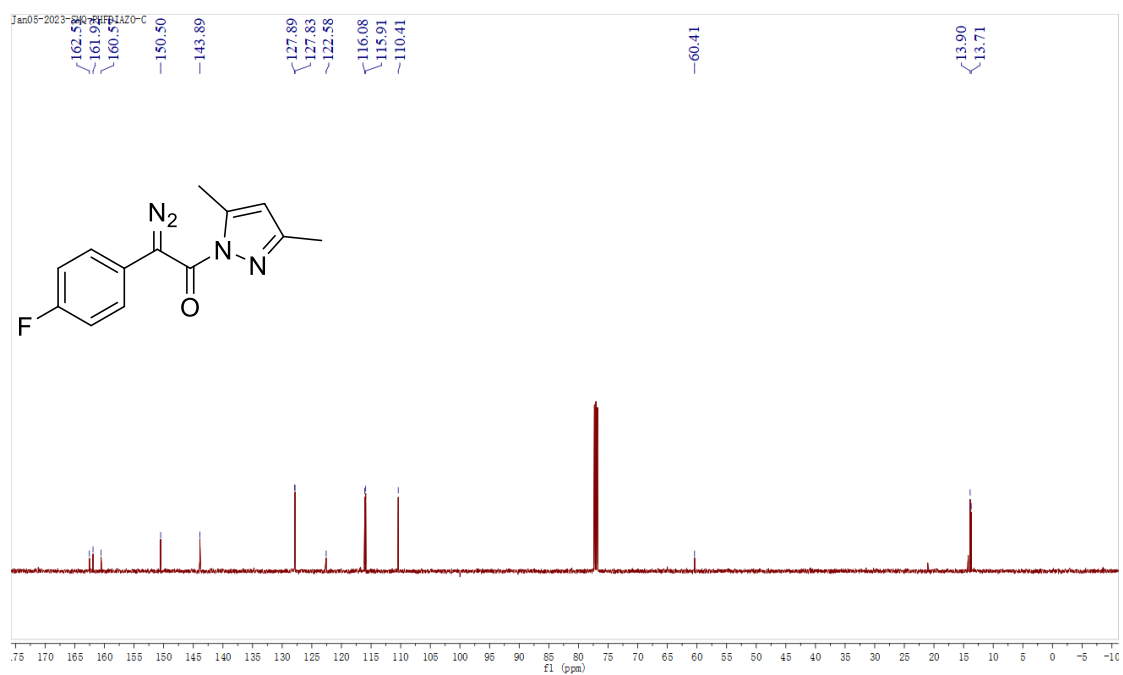

**<sup>19</sup>F NMR (376 MHz, CDCl<sub>3</sub>) spectra for 1'g**

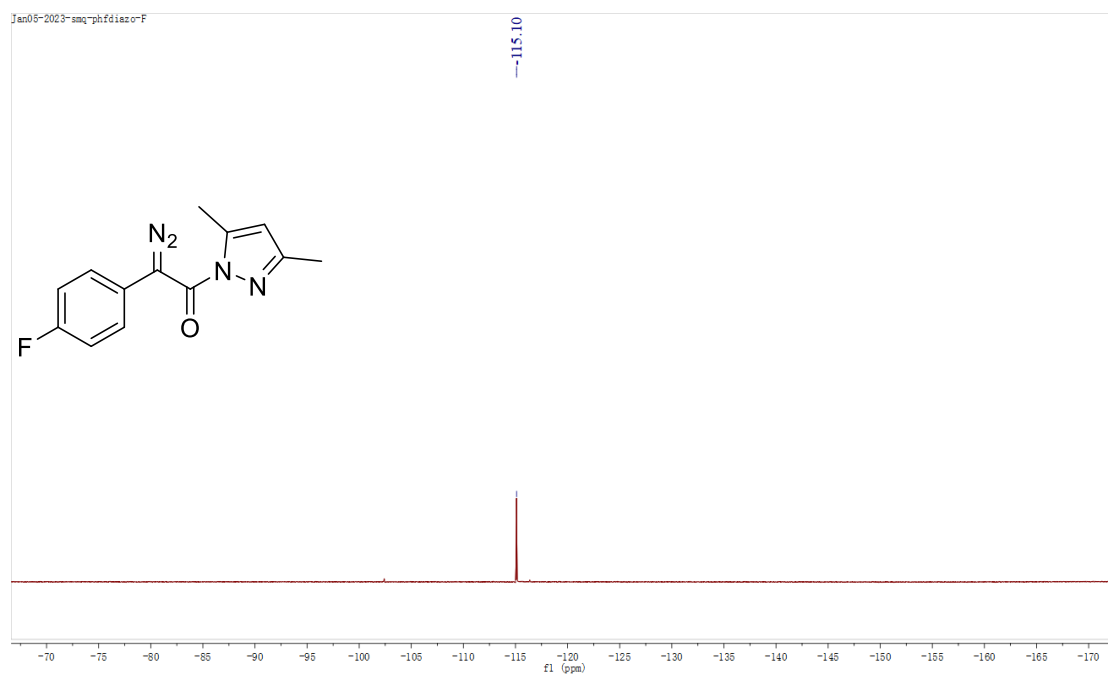



**<sup>1</sup>H NMR (500 MHz, CDCl<sub>3</sub>) and <sup>13</sup>C NMR (100 MHz, CDCl<sub>3</sub>) spectra for 1'h**

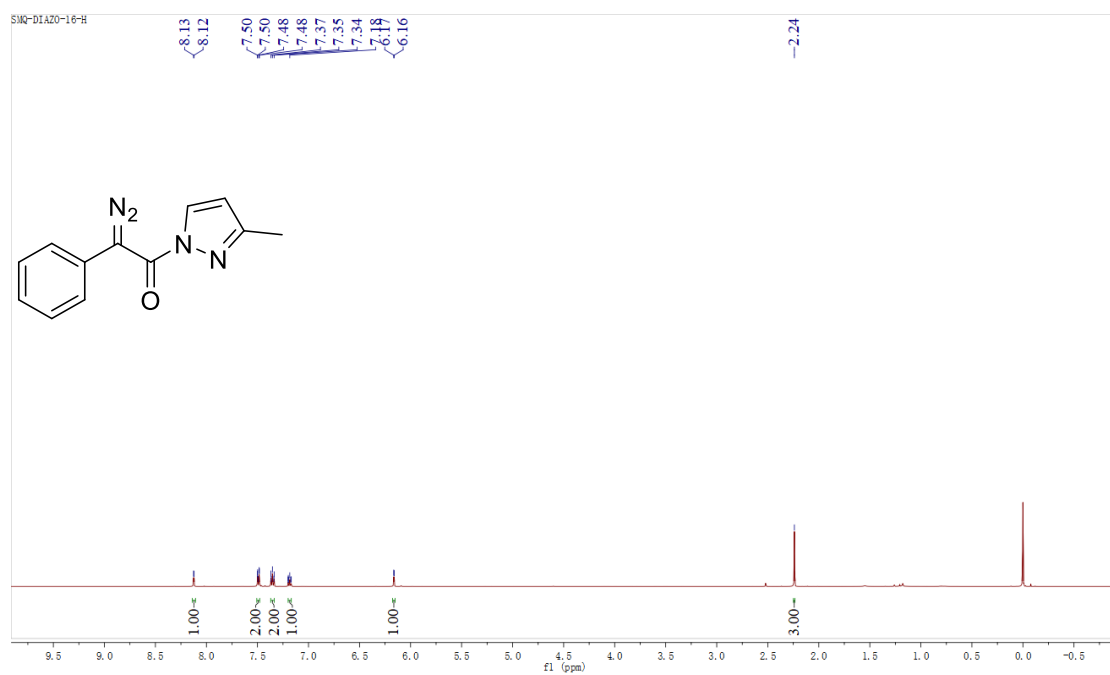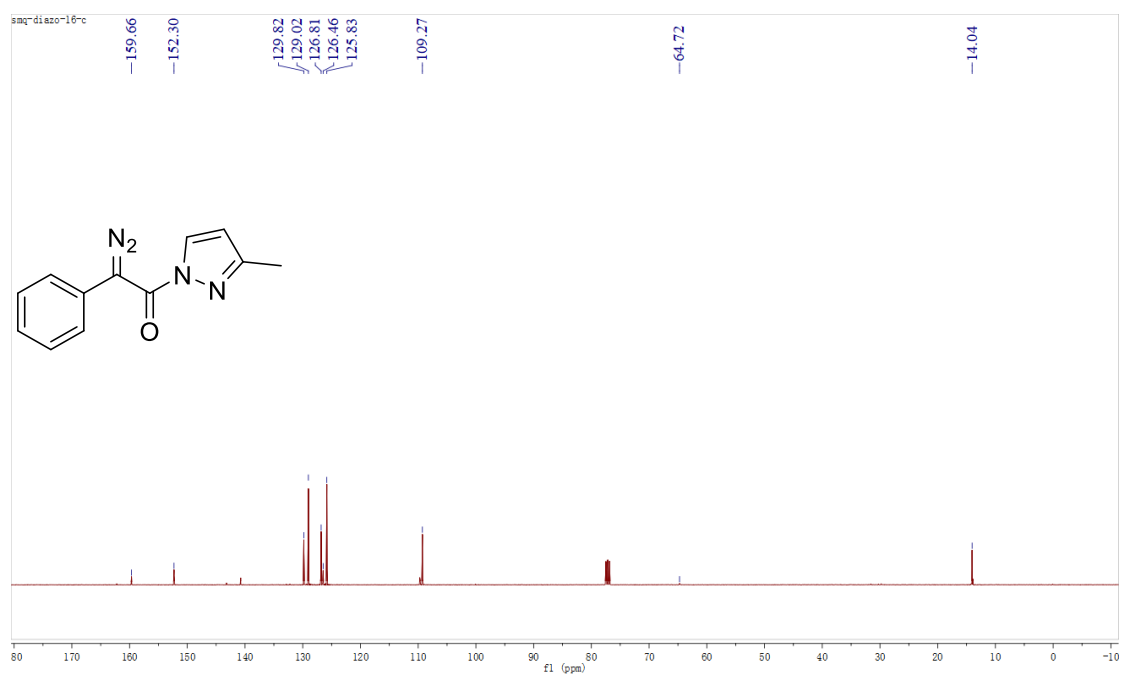

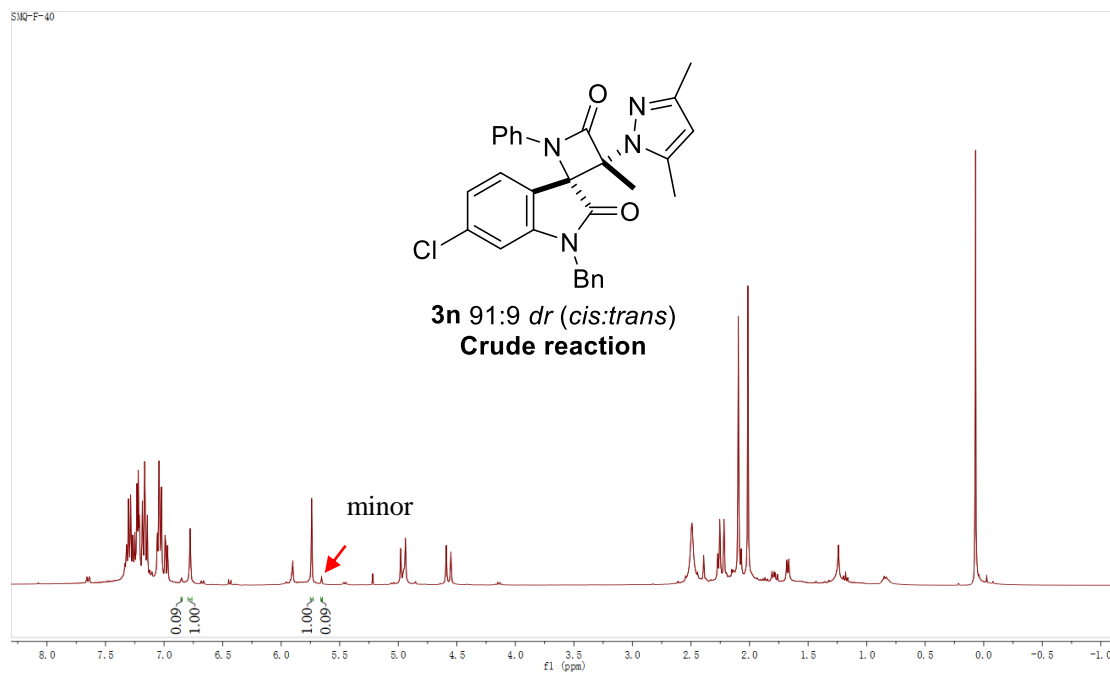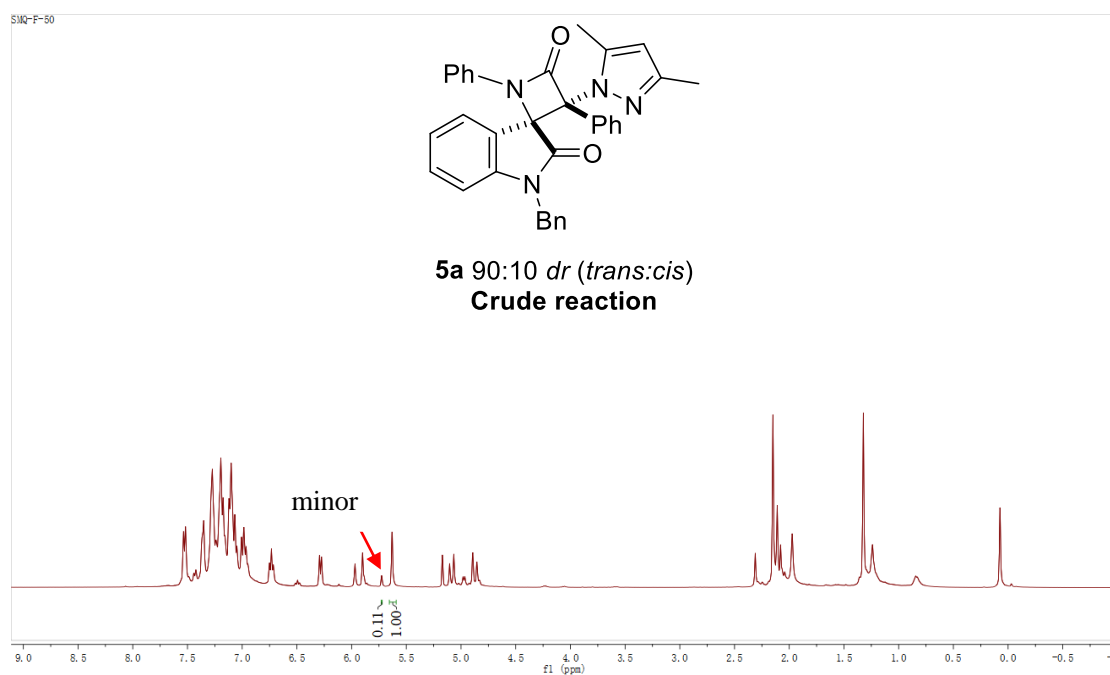

**$^1\text{H}$  NMR (400 MHz,  $\text{CDCl}_3$ ) and  $^{13}\text{C}$  NMR (100 MHz,  $\text{CDCl}_3$ ) spectra for 3a**

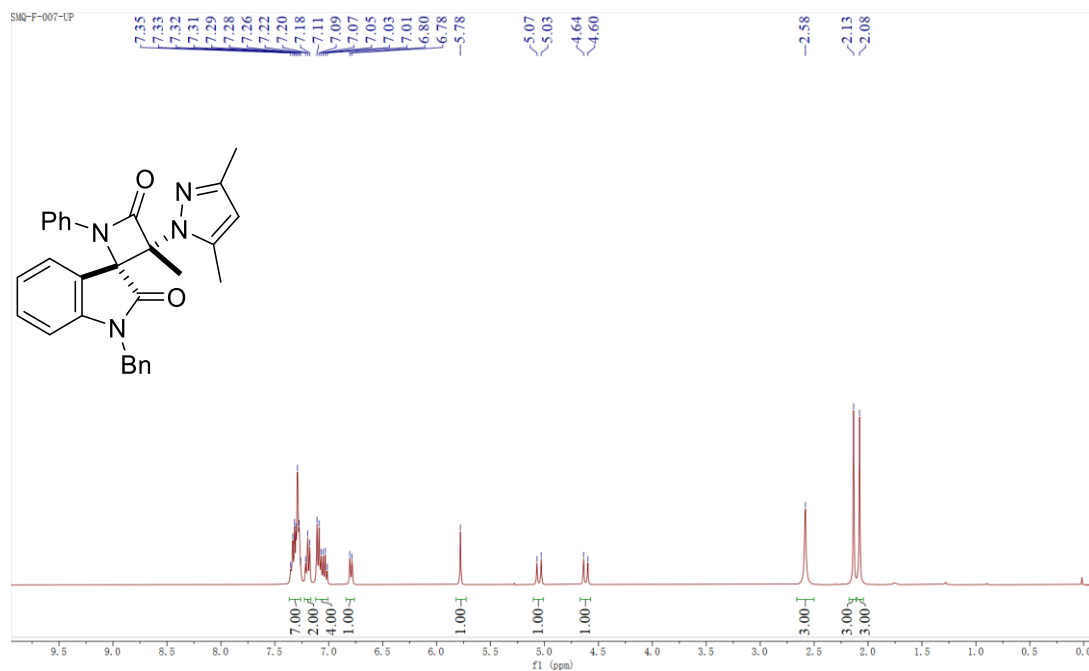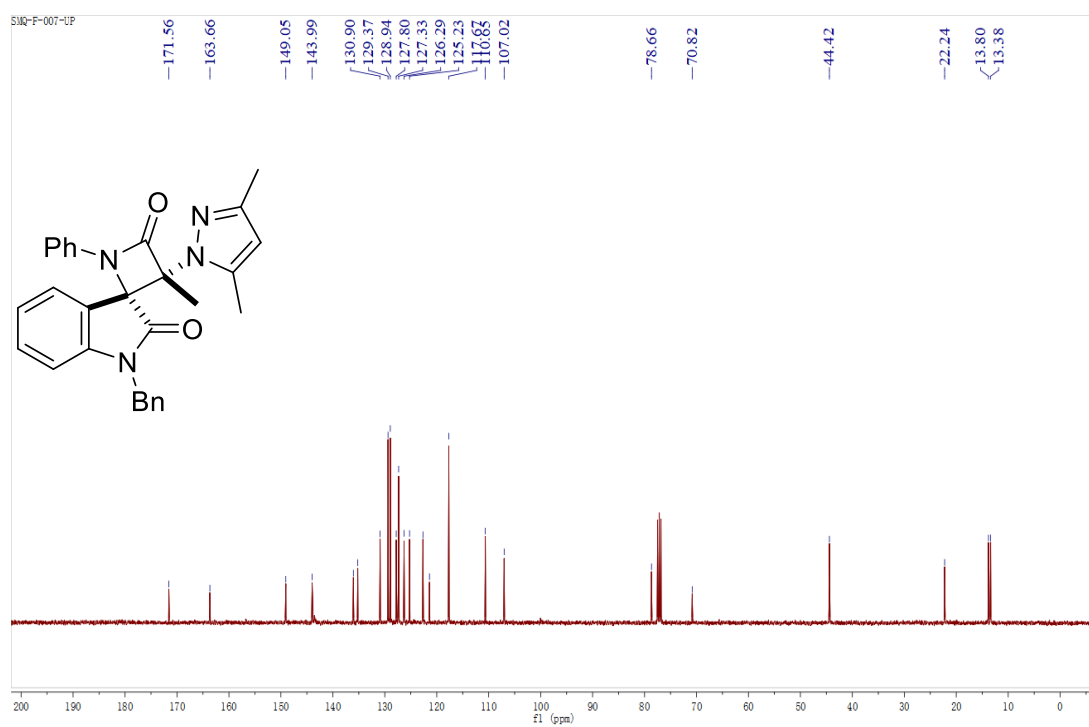

**<sup>1</sup>H NMR (400 MHz, CDCl<sub>3</sub>) and <sup>13</sup>C NMR (100 MHz, CDCl<sub>3</sub>) spectra for 3b**

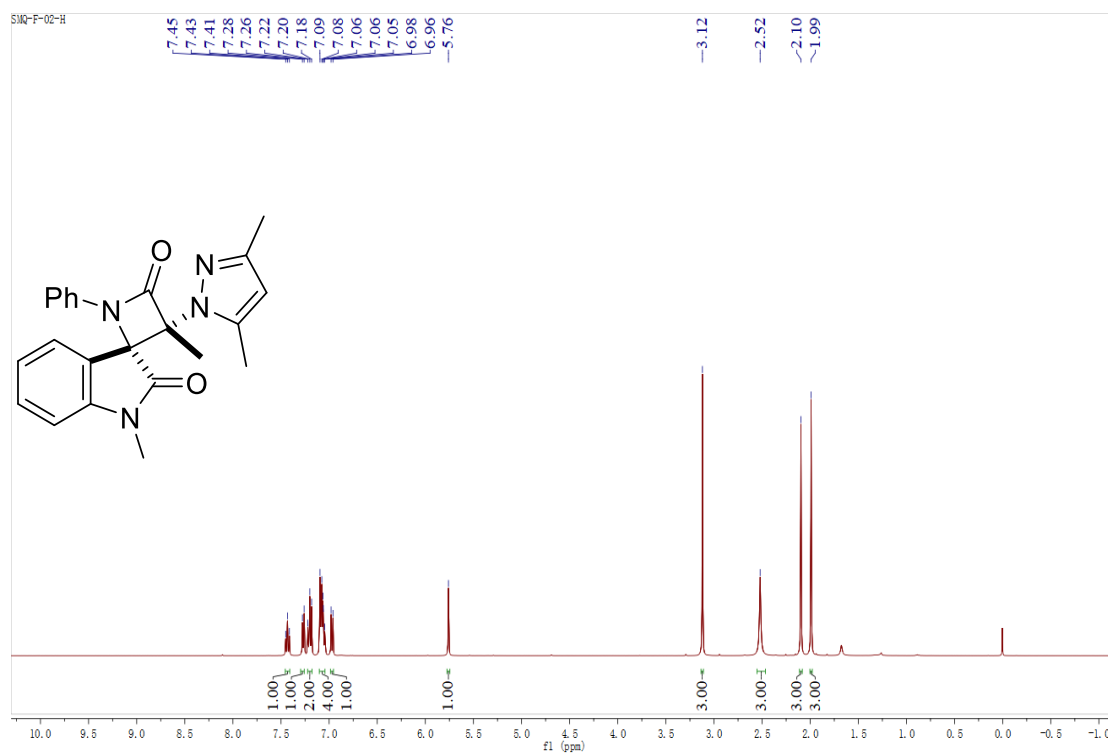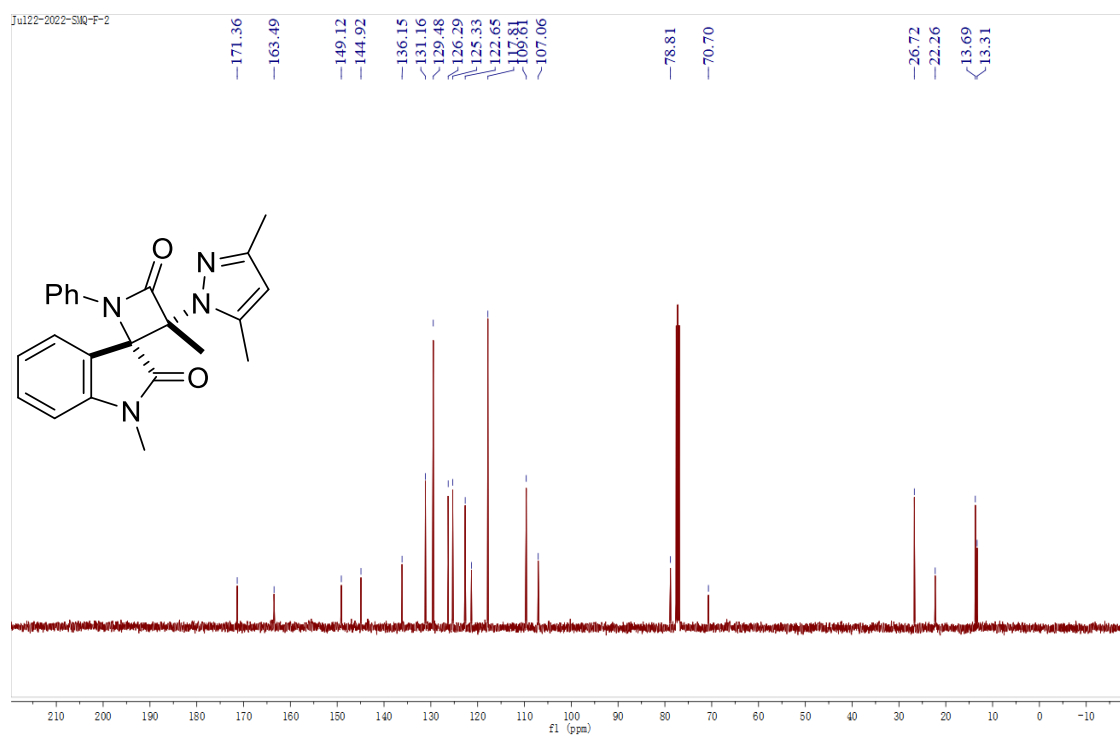

**<sup>1</sup>H NMR (400 MHz, CDCl<sub>3</sub>) and <sup>13</sup>C NMR (125 MHz, CDCl<sub>3</sub>) spectra for 3c**

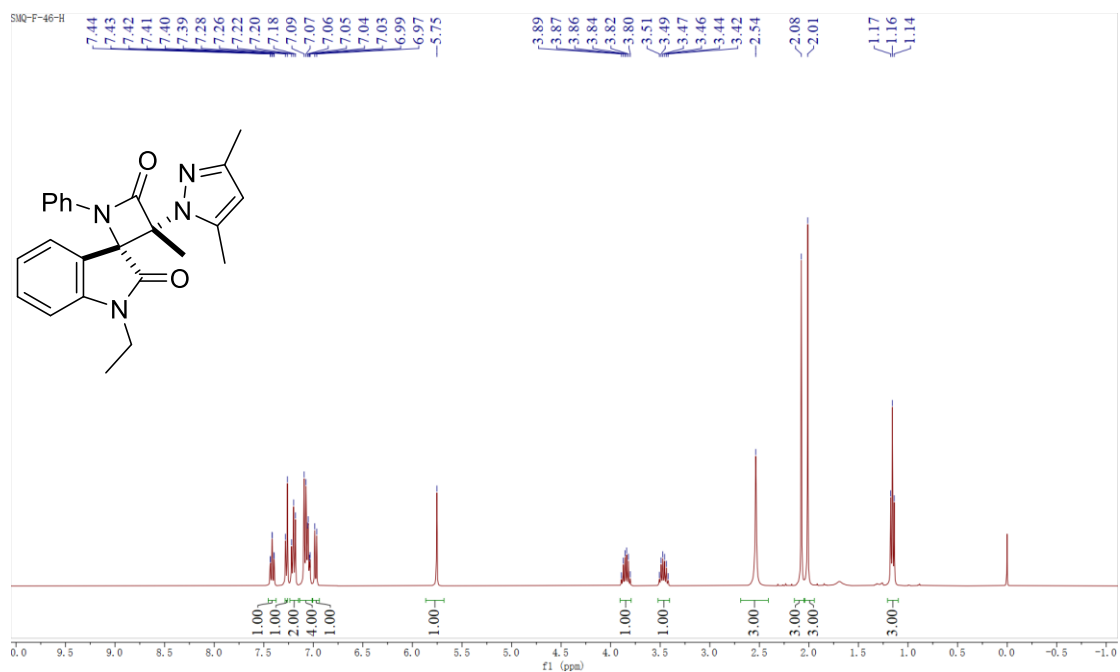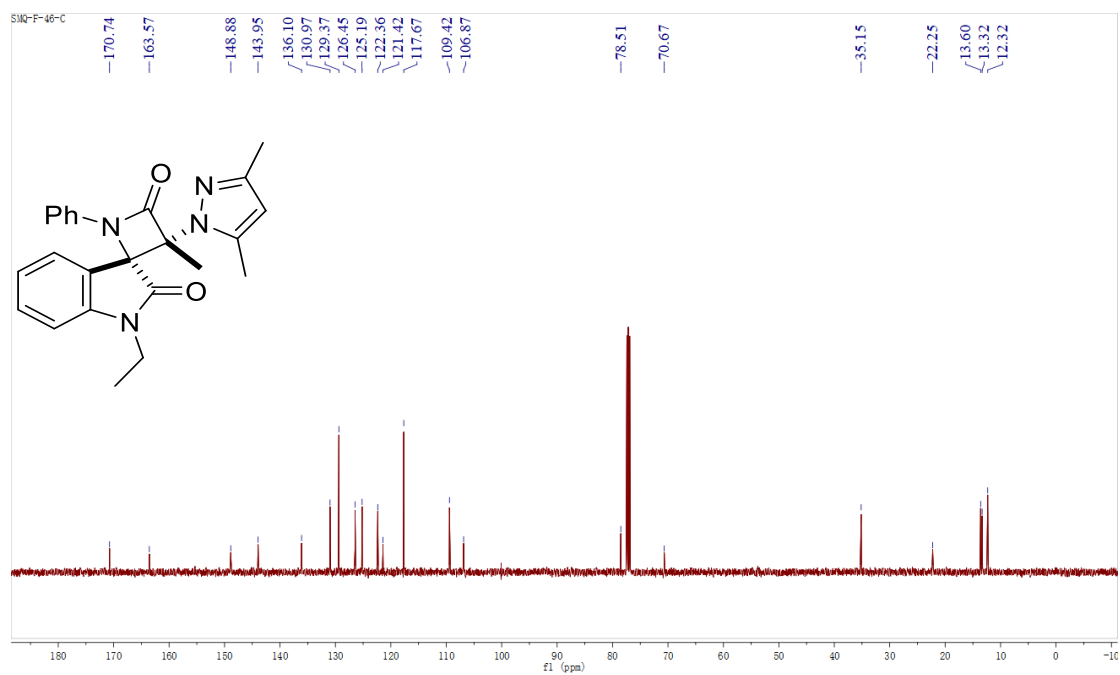

**<sup>1</sup>H NMR (500 MHz, CDCl<sub>3</sub>) and <sup>13</sup>C NMR (125 MHz, CDCl<sub>3</sub>) spectra for 3d**

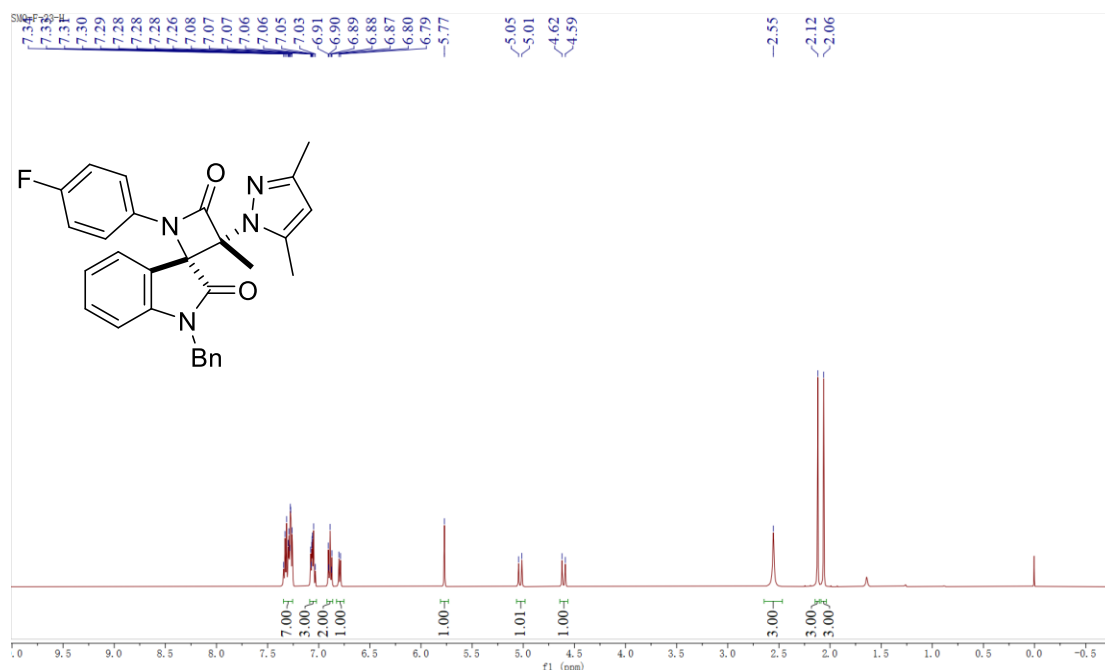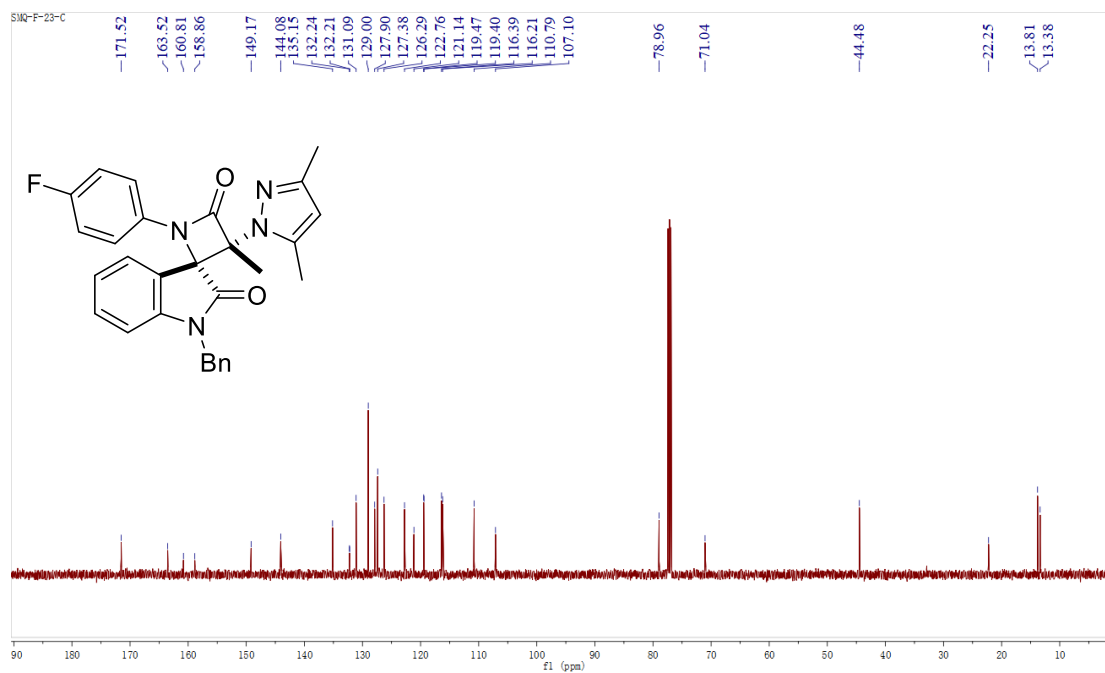

**<sup>19</sup>F NMR (376 MHz, CDCl<sub>3</sub>) spectra for 3d**

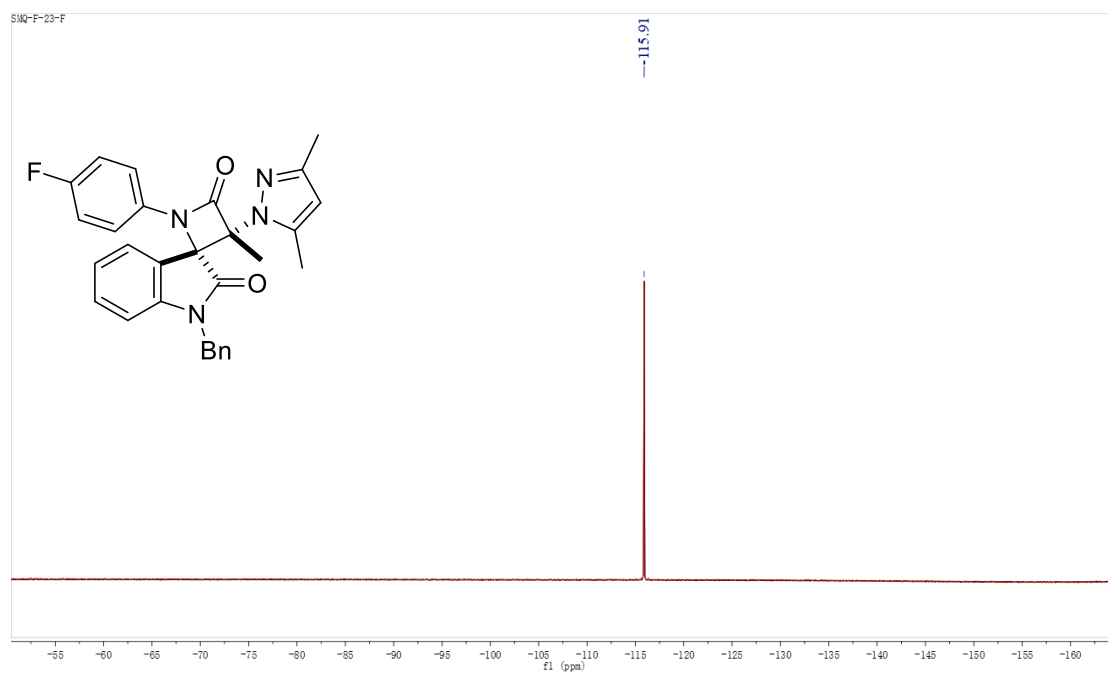

<sup>1</sup>H NMR (500 MHz, CDCl<sub>3</sub>) and <sup>13</sup>C NMR (125 MHz, CDCl<sub>3</sub>) spectra for 3e

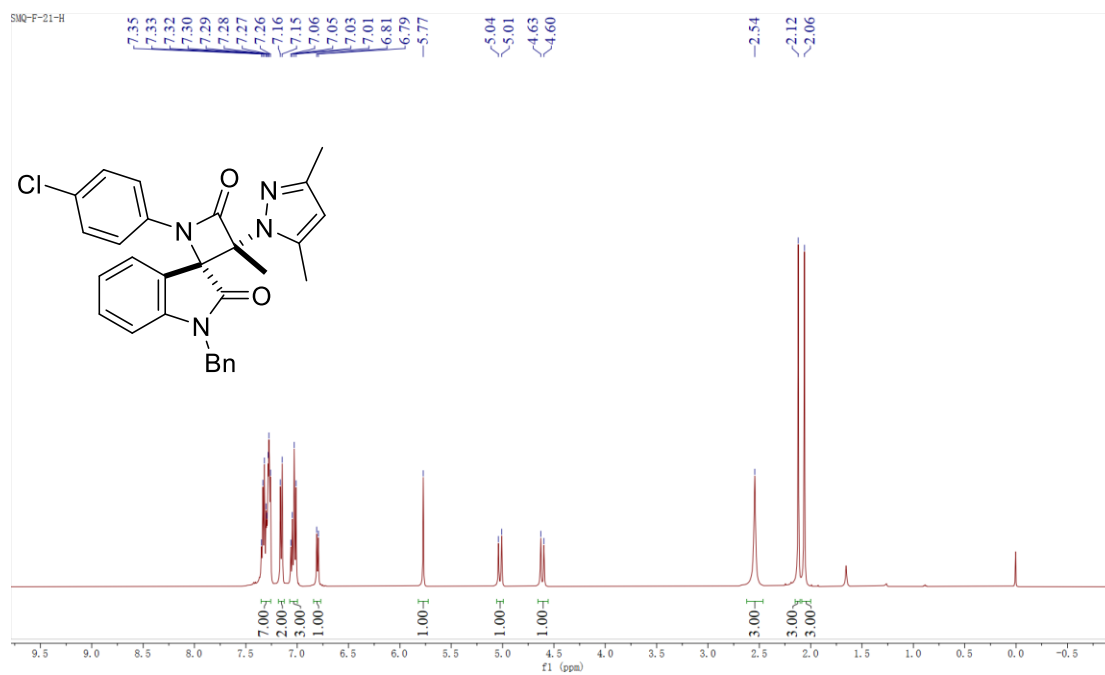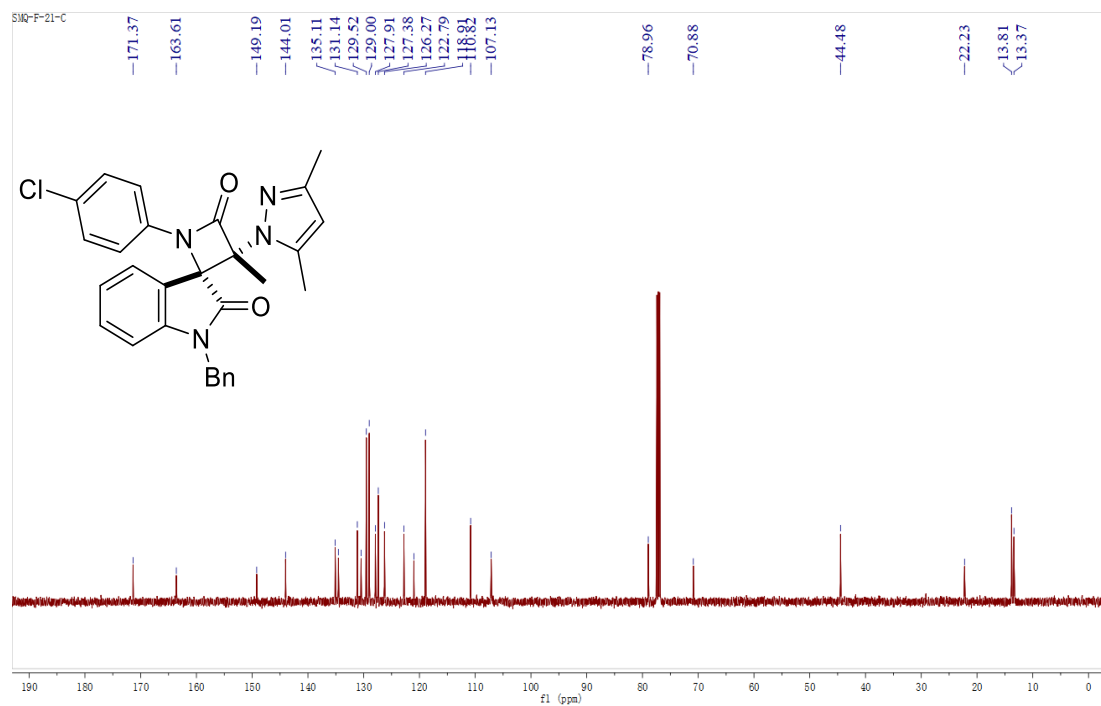



**$^1\text{H}$  NMR (500 MHz,  $\text{CDCl}_3$ ) and  $^{13}\text{C}$  NMR (125 MHz,  $\text{CDCl}_3$ ) spectra for 3f**

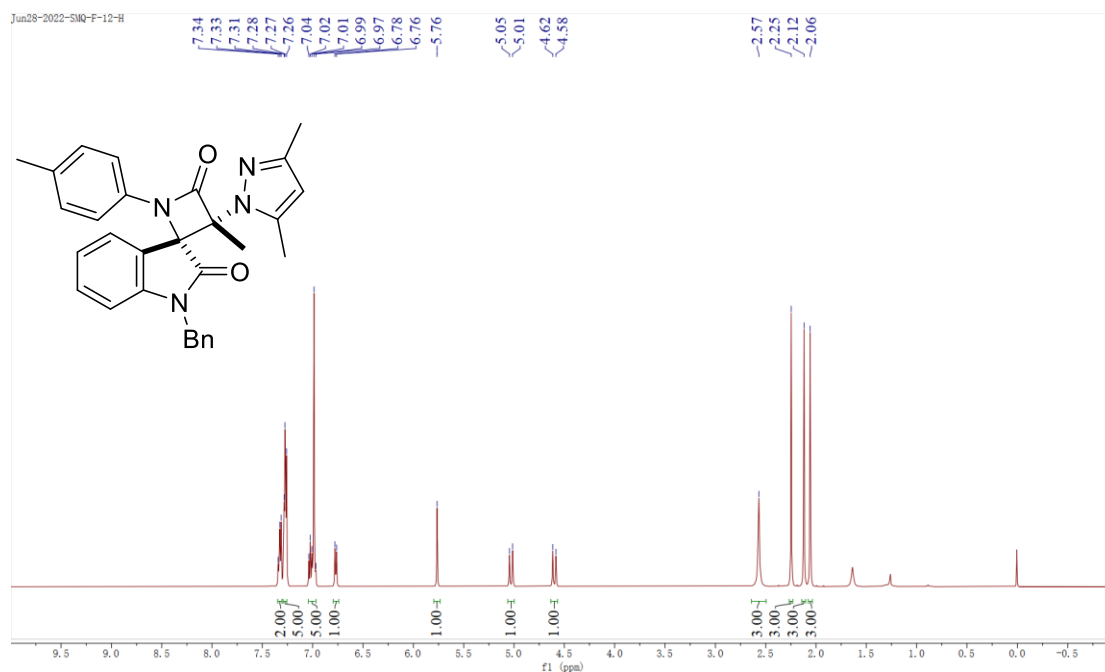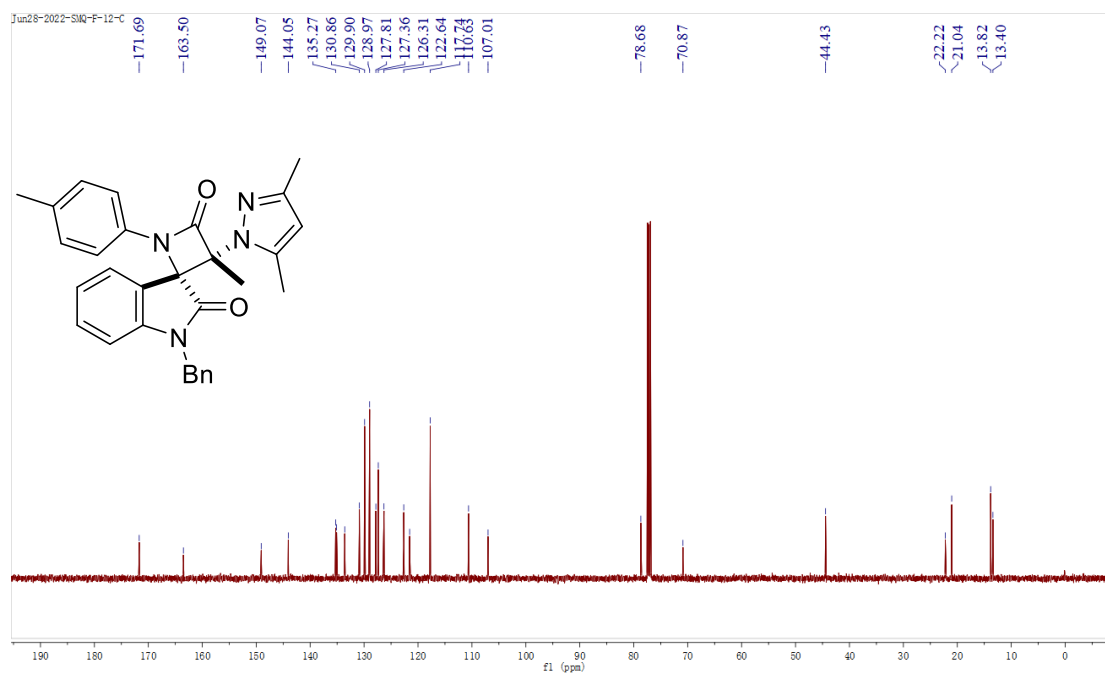

**<sup>1</sup>H NMR (500 MHz, CDCl<sub>3</sub>) and <sup>13</sup>C NMR (125 MHz, CDCl<sub>3</sub>) spectra for 3g**

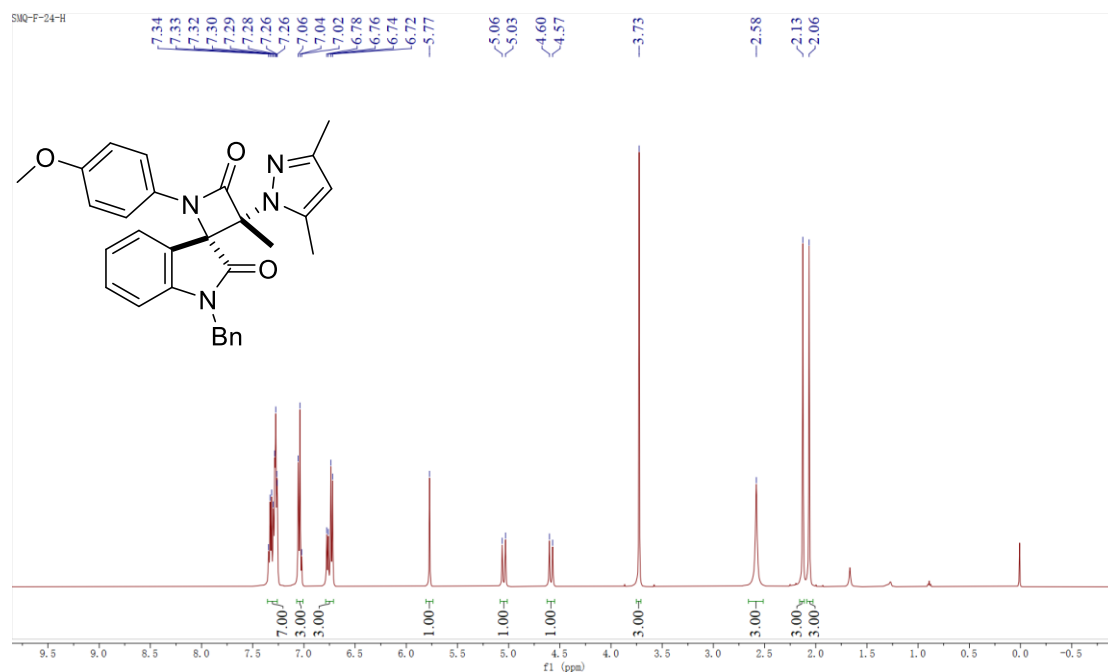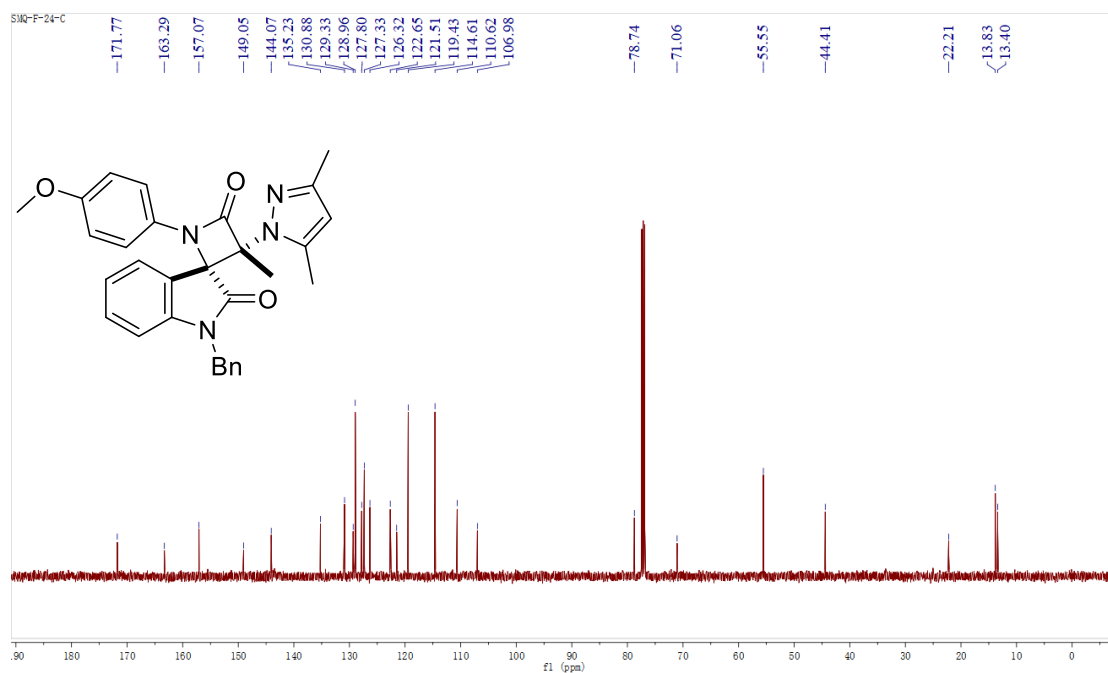

**<sup>1</sup>H NMR (400 MHz, CDCl<sub>3</sub>) and <sup>13</sup>C NMR (125 MHz, CDCl<sub>3</sub>) spectra for 3h**

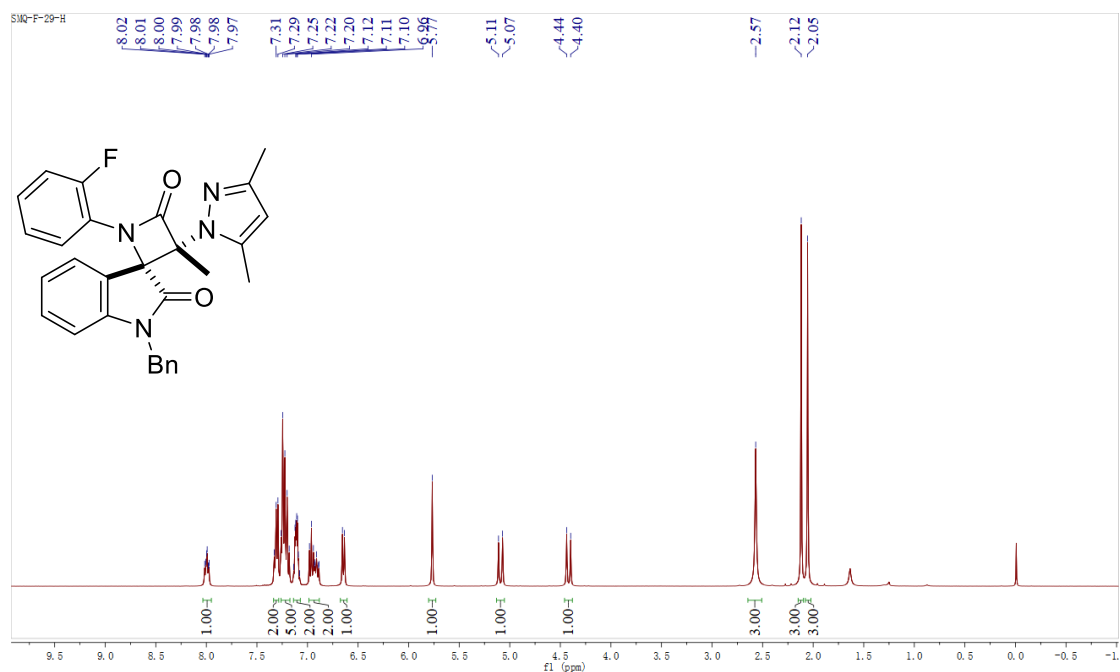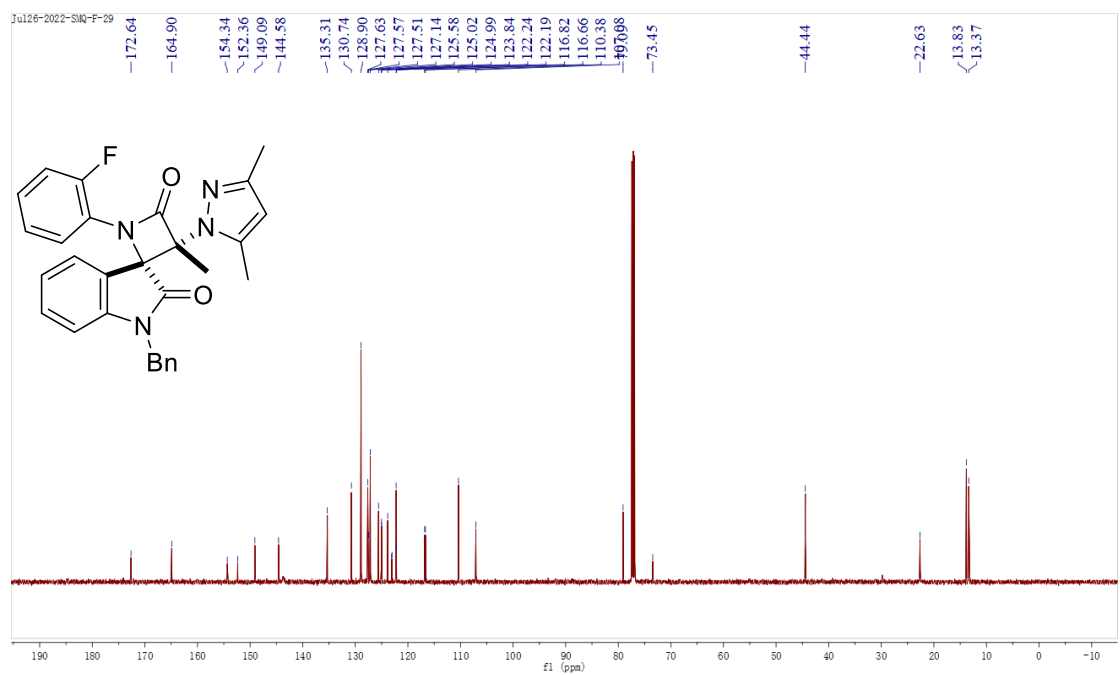

**<sup>19</sup>F NMR (376 MHz, CDCl<sub>3</sub>) spectra for 3h**

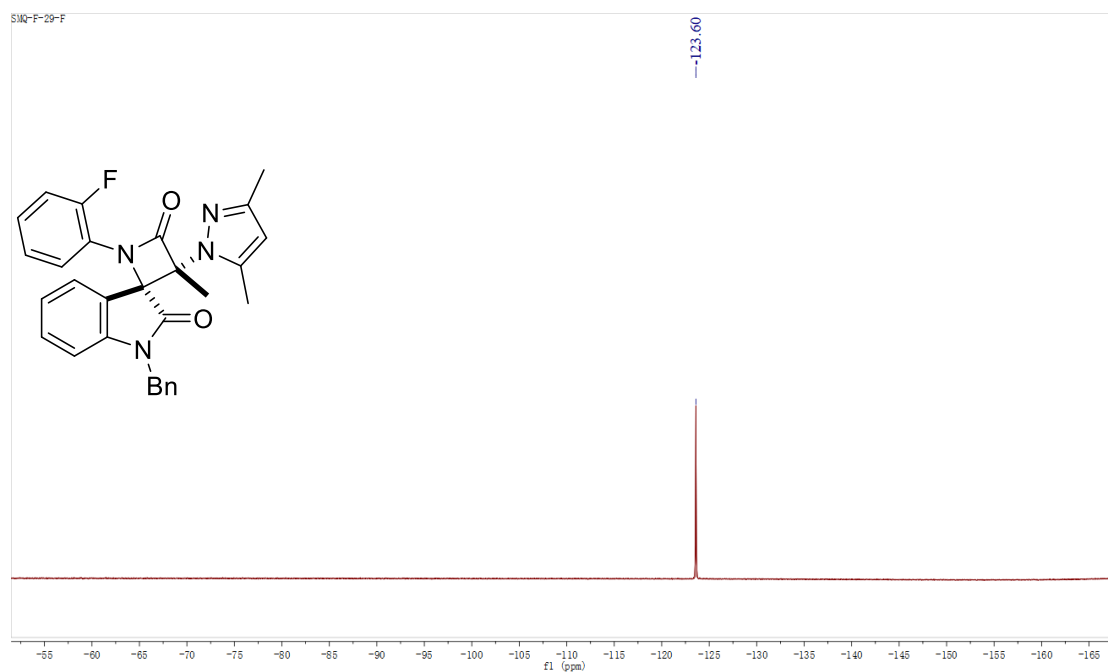

**$^1\text{H}$  NMR (500 MHz,  $\text{CDCl}_3$ ) and  $^{13}\text{C}$  NMR (125 MHz,  $\text{CDCl}_3$ ) spectra for **3i****

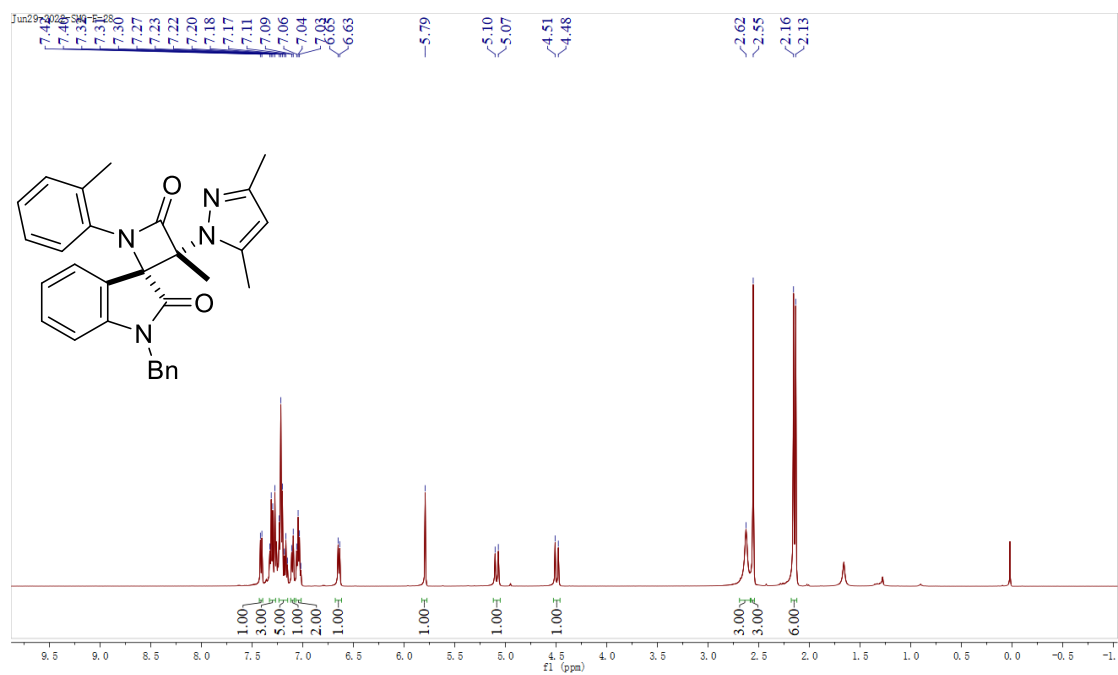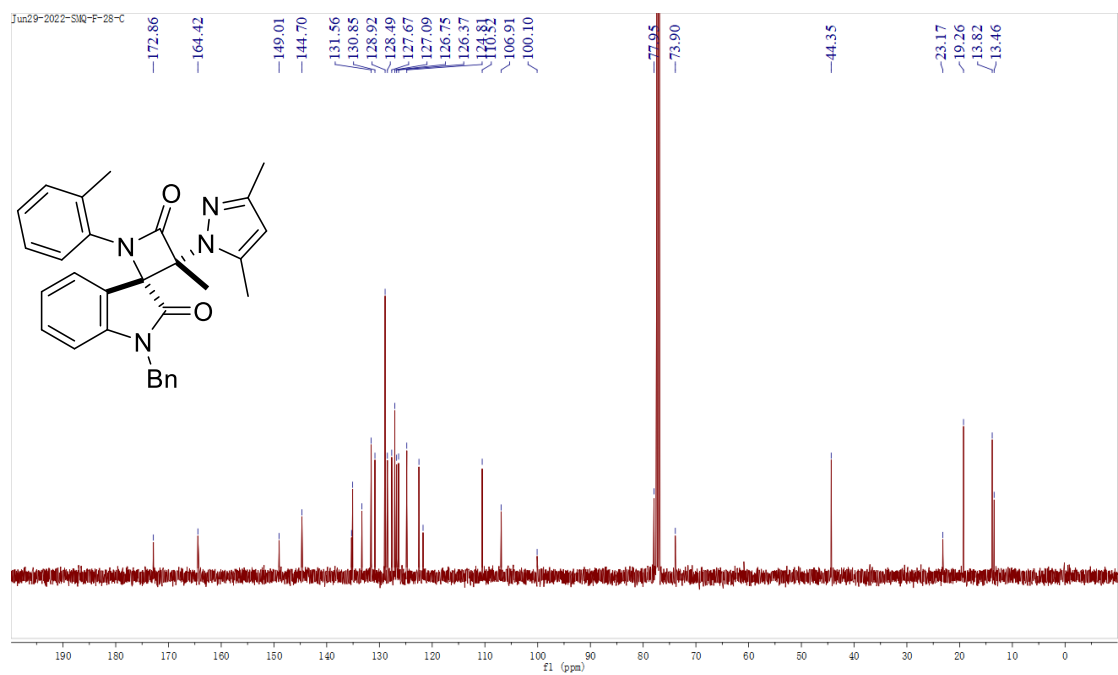

<sup>1</sup>H NMR (500 MHz, CDCl<sub>3</sub>) and <sup>13</sup>C NMR (125 MHz, CDCl<sub>3</sub>) spectra for 3j

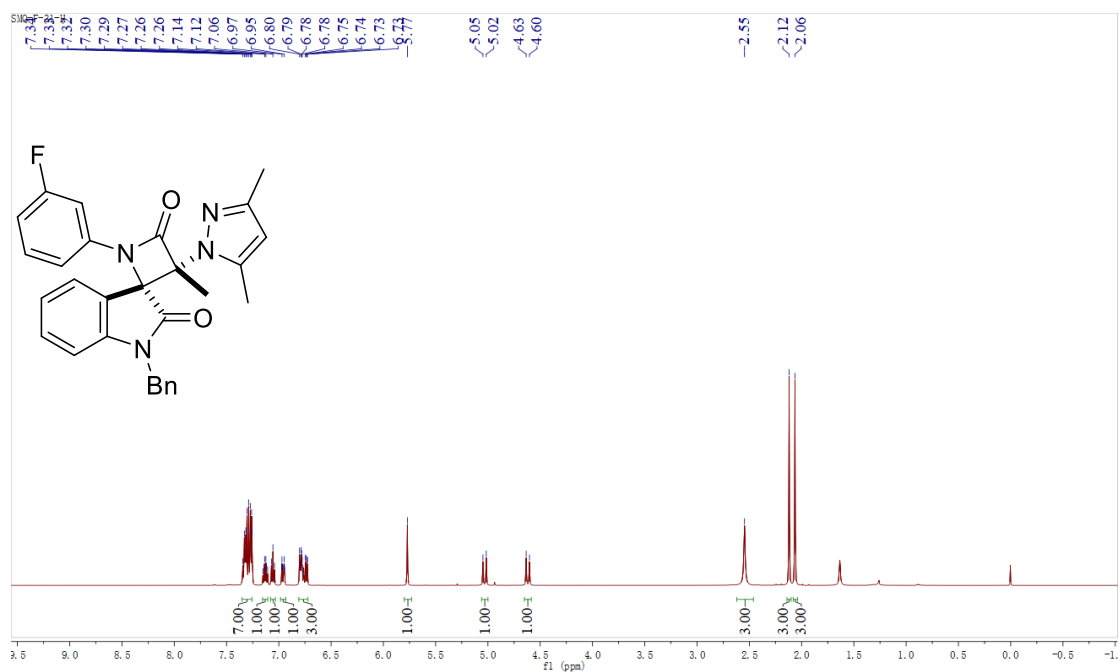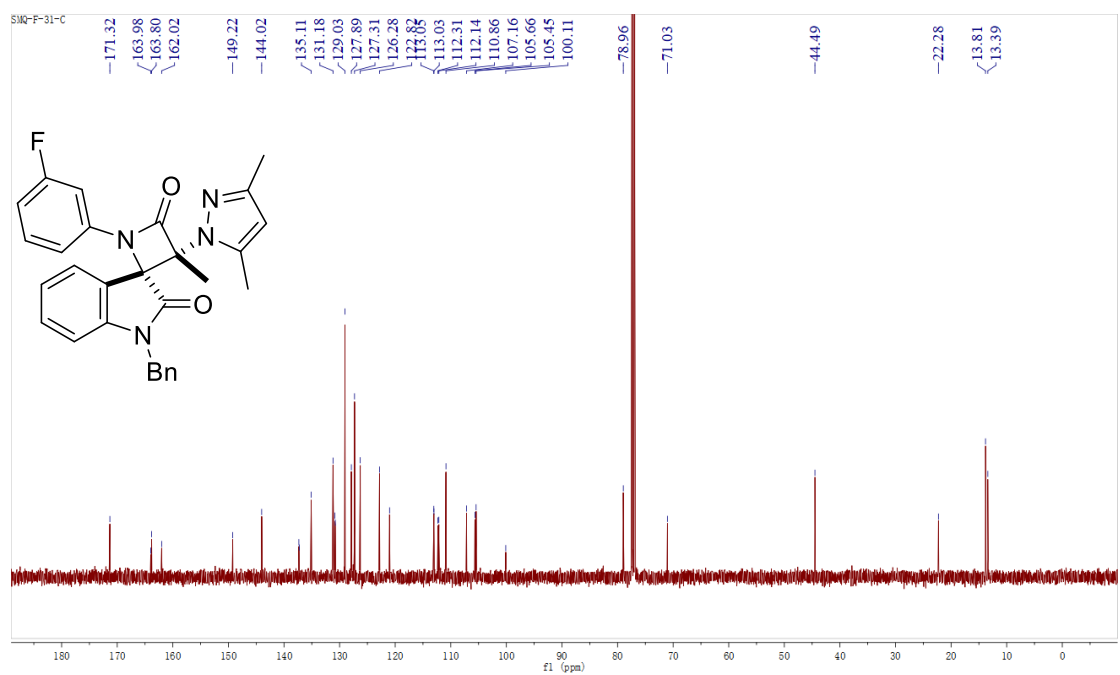

**<sup>19</sup>F NMR (376 MHz, CDCl<sub>3</sub>) and spectra for 3j**

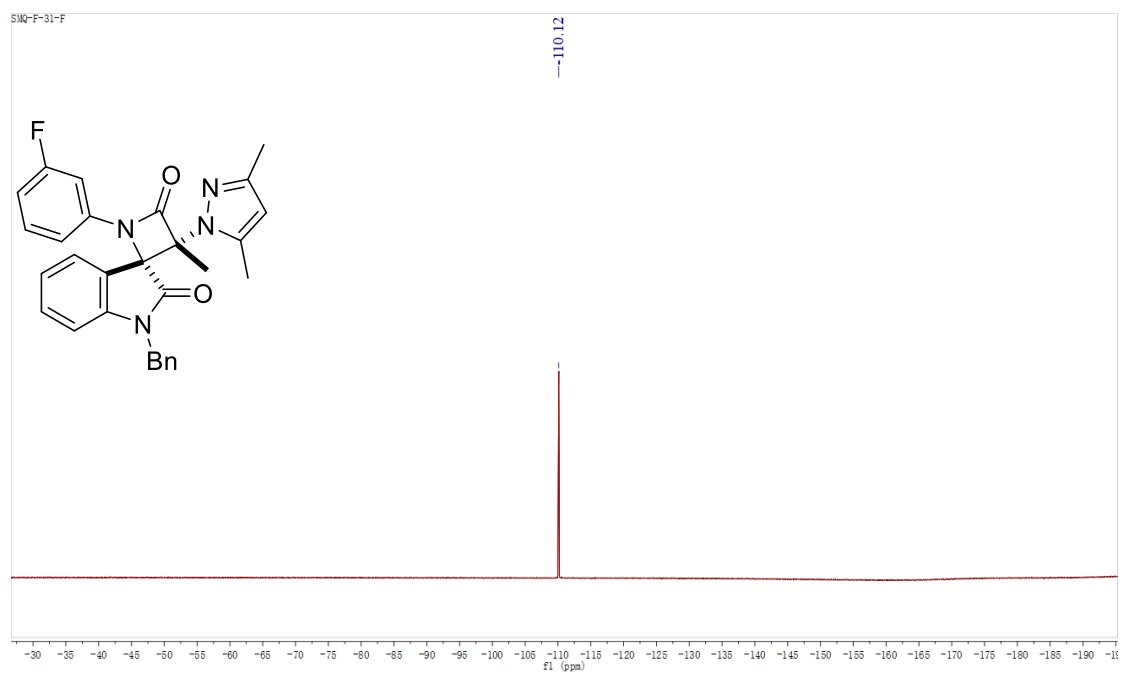

**<sup>1</sup>H NMR (500 MHz, CDCl<sub>3</sub>) and <sup>13</sup>C NMR (125 MHz, CDCl<sub>3</sub>) spectra for 3k**

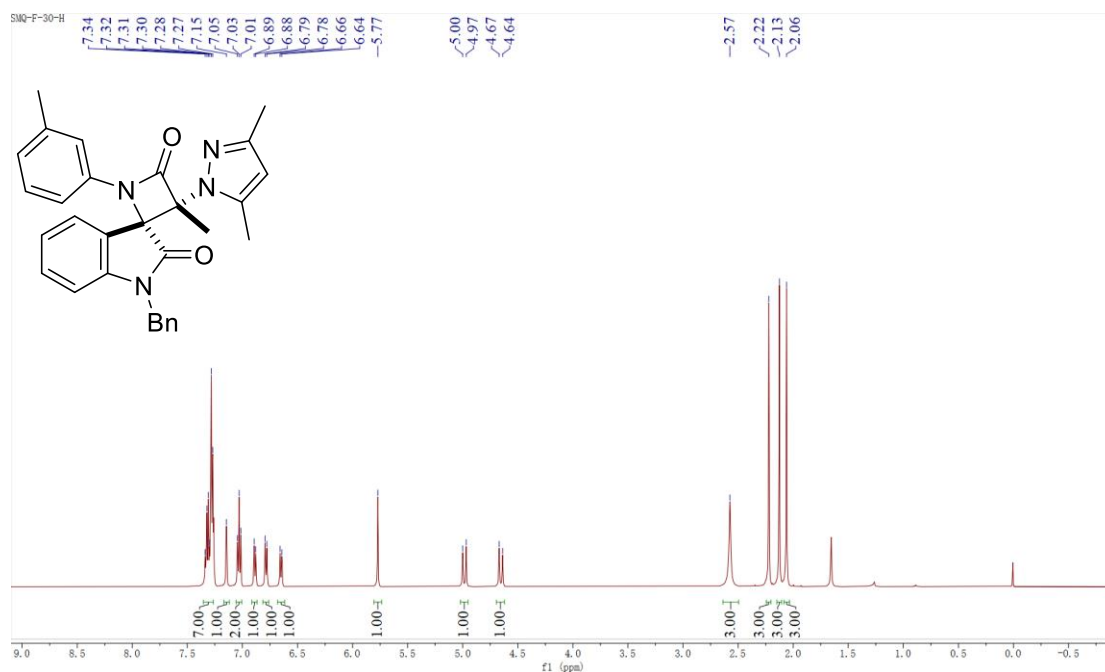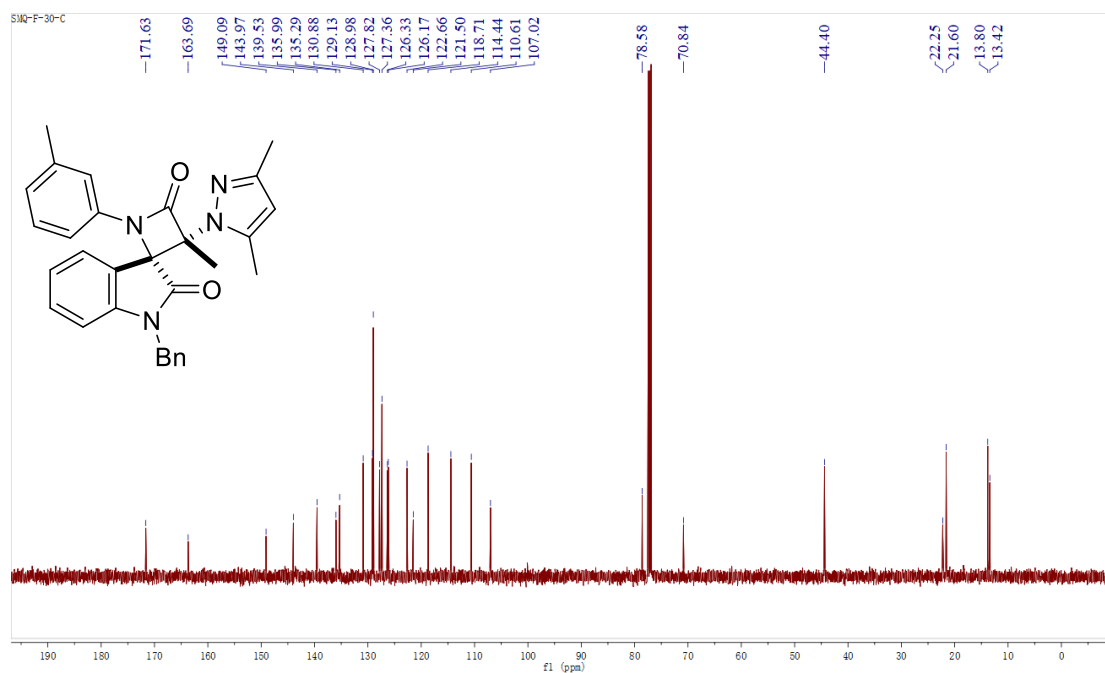



**<sup>1</sup>H NMR (500 MHz, CDCl<sub>3</sub>) and <sup>13</sup>C NMR (125 MHz, CDCl<sub>3</sub>) spectra for 3l**

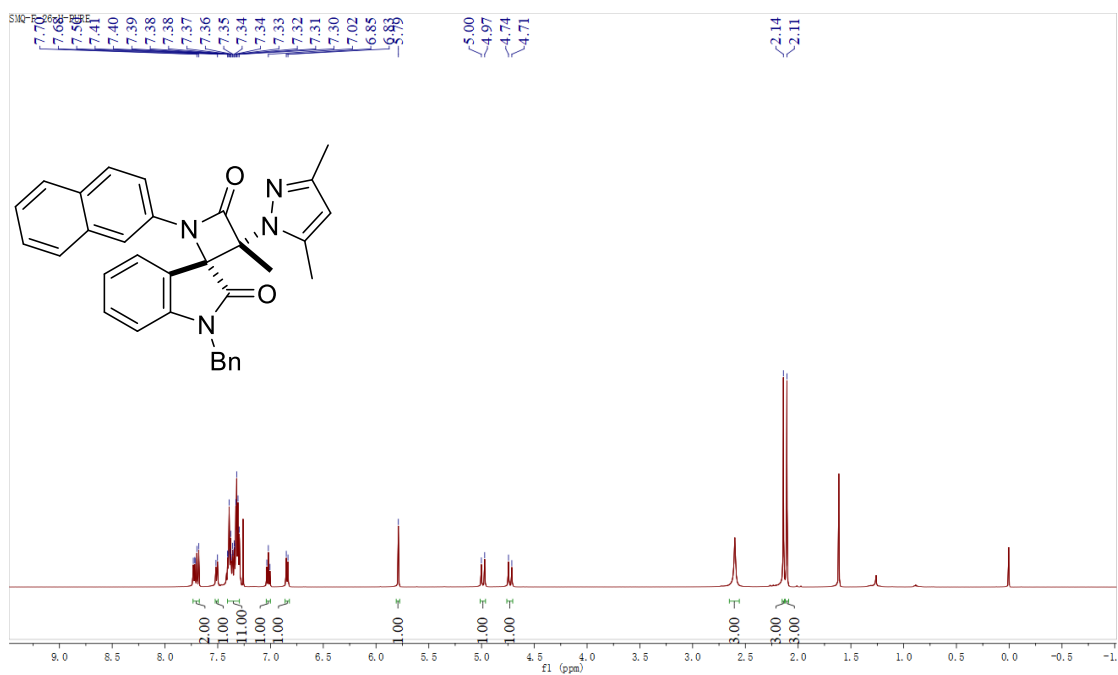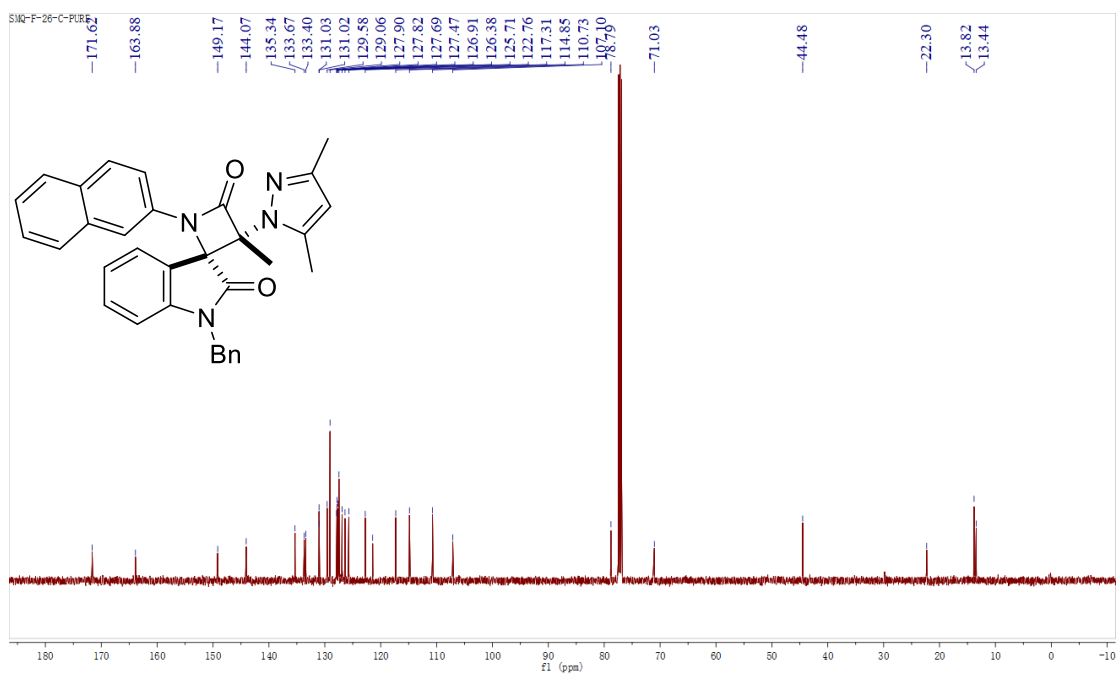

**$^1\text{H}$  NMR (500 MHz,  $\text{CDCl}_3$ ) and  $^{13}\text{C}$  NMR (125 MHz,  $\text{CDCl}_3$ ) spectra for 3m**

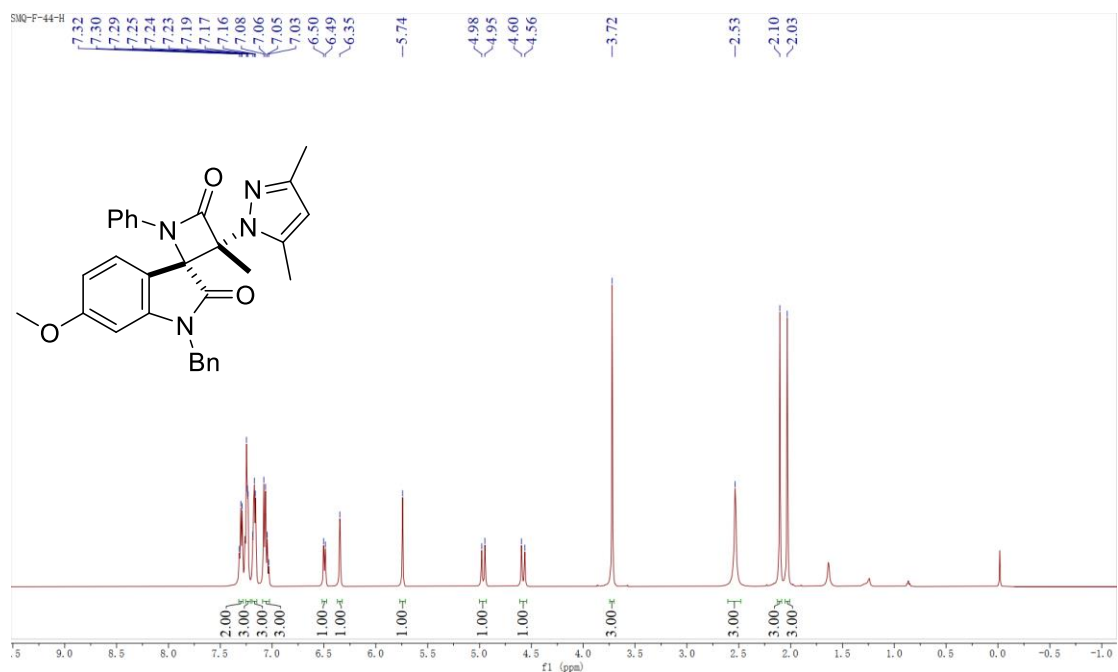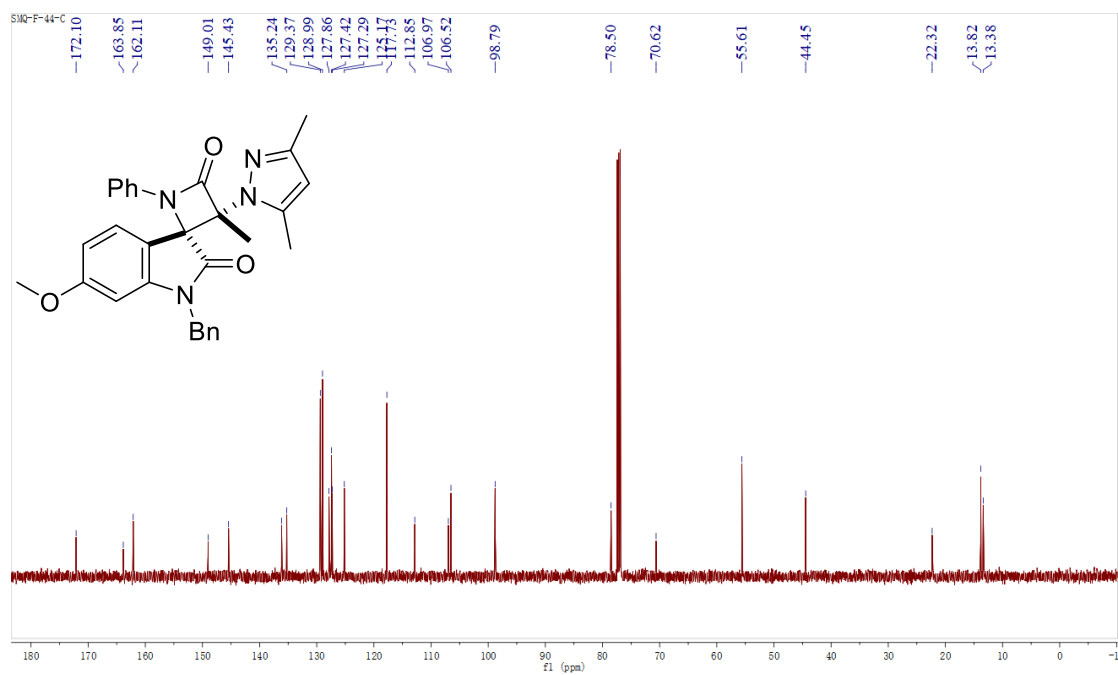

**$^1\text{H}$  NMR (500 MHz,  $\text{CDCl}_3$ ) and  $^{13}\text{C}$  NMR (125 MHz,  $\text{CDCl}_3$ ) spectra for 3n**

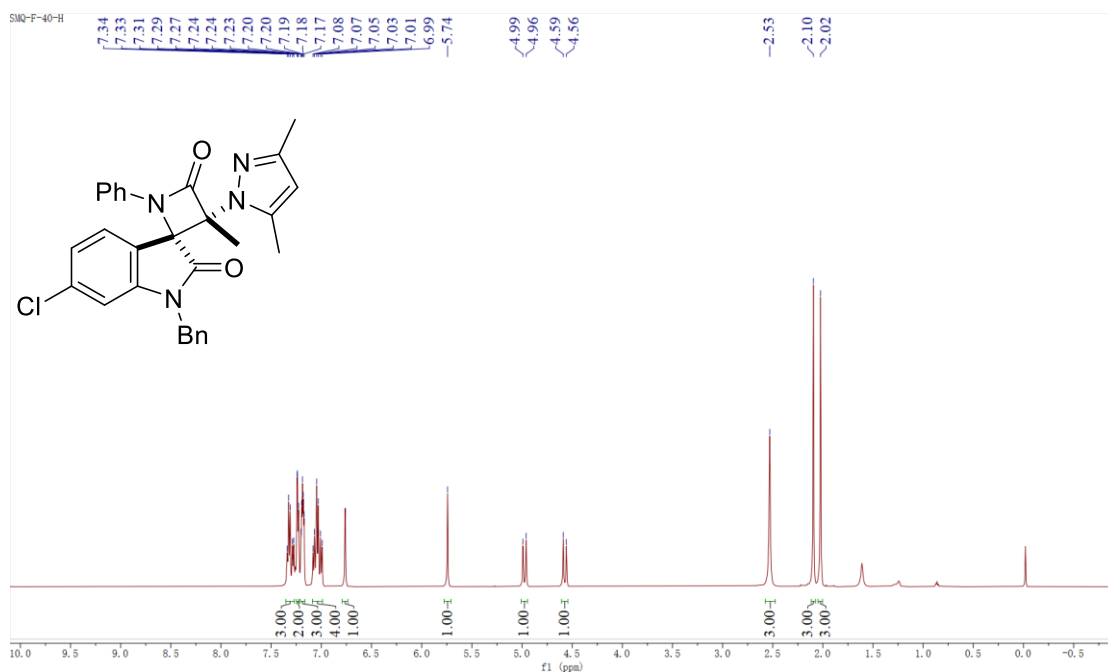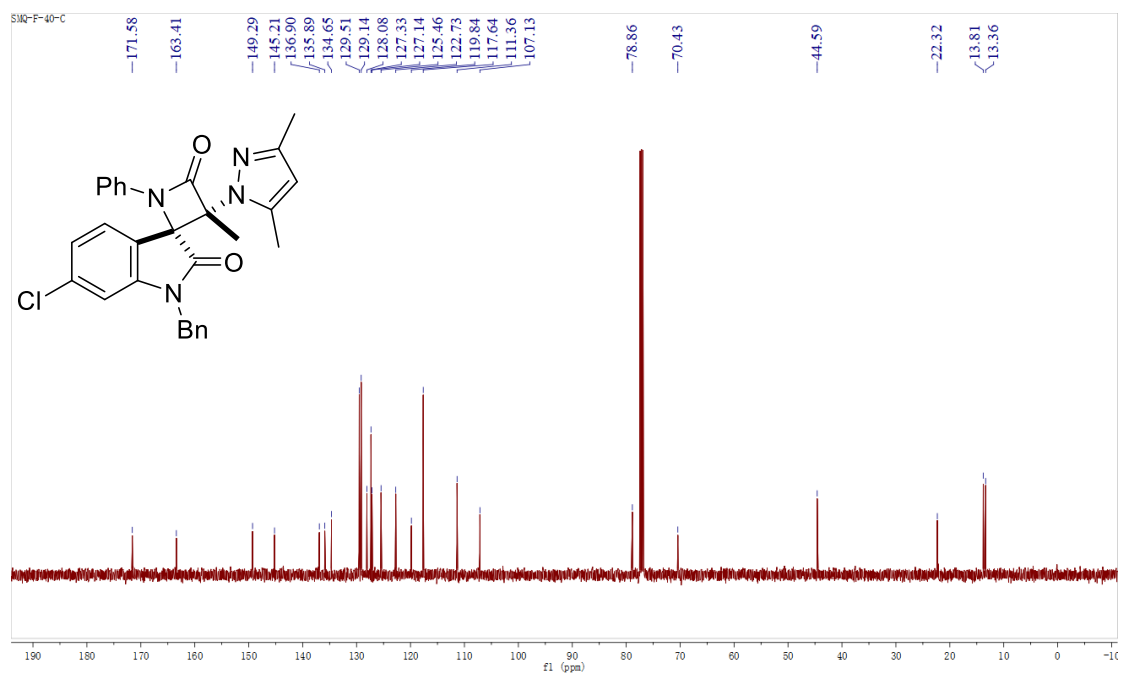

**<sup>1</sup>H NMR (500 MHz, CDCl<sub>3</sub>) and <sup>13</sup>C NMR (125 MHz, CDCl<sub>3</sub>) spectra for 3o**

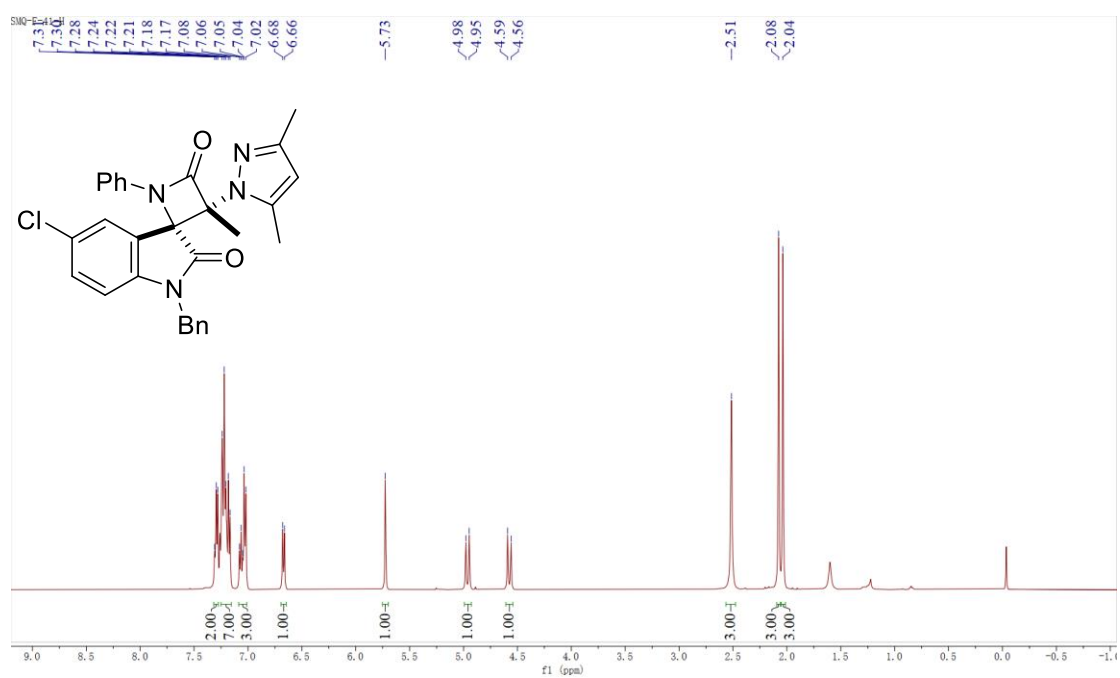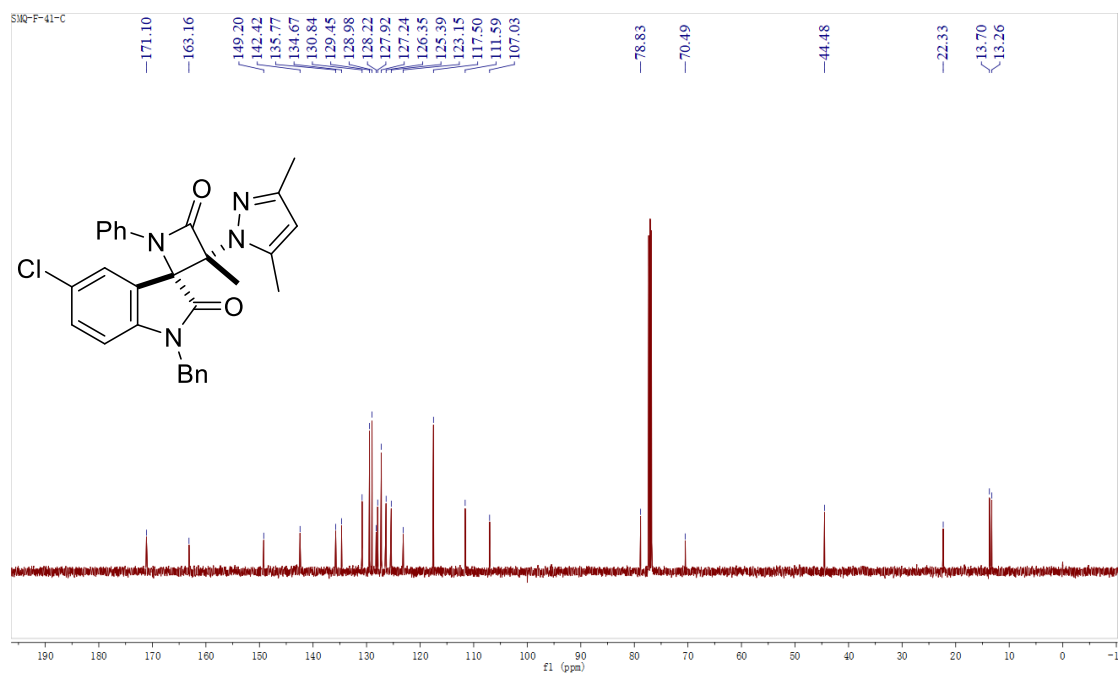

**$^1\text{H}$  NMR (500 MHz,  $\text{CDCl}_3$ ) and  $^{13}\text{C}$  NMR (125 MHz,  $\text{CDCl}_3$ ) spectra for 3p**

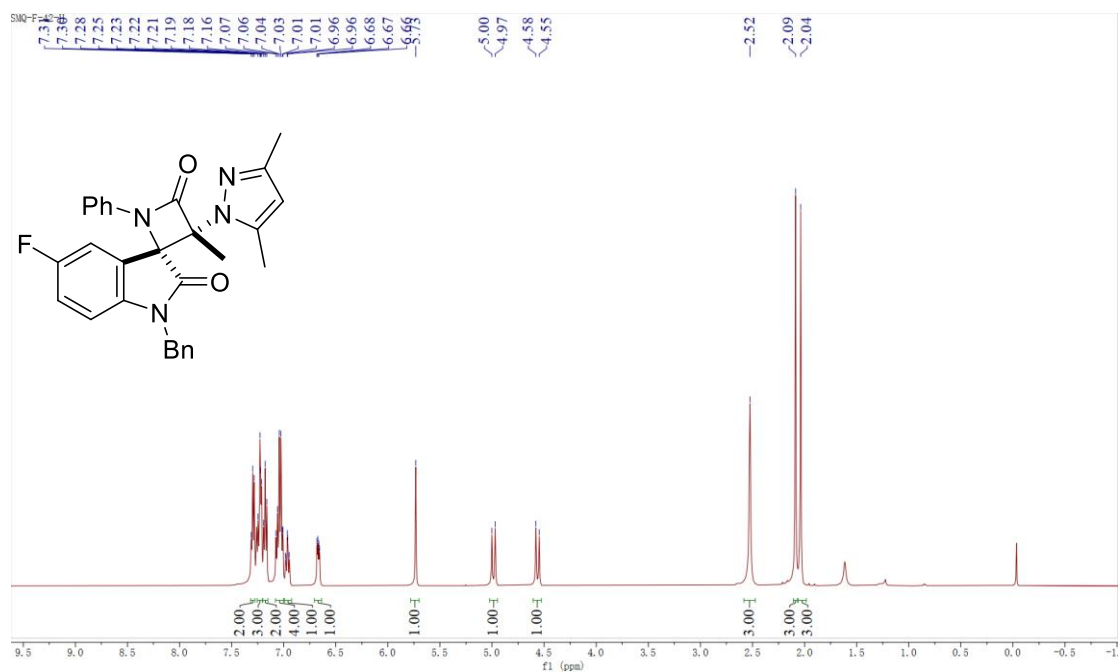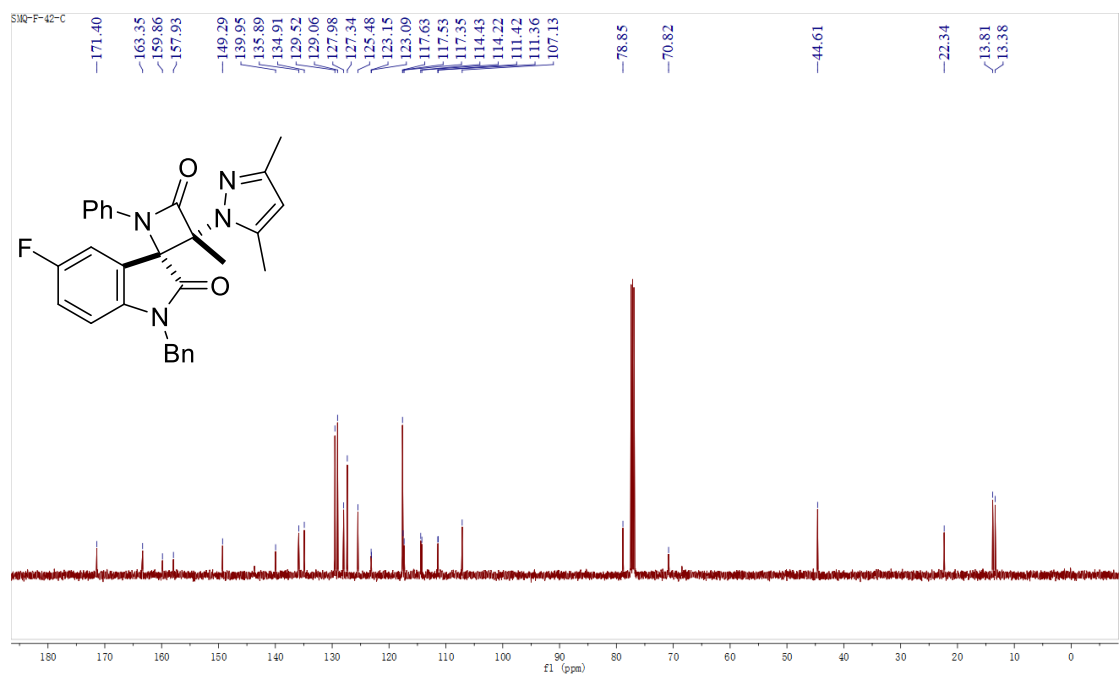

**<sup>19</sup>F NMR (376 MHz, CDCl<sub>3</sub>) spectra for 3p**

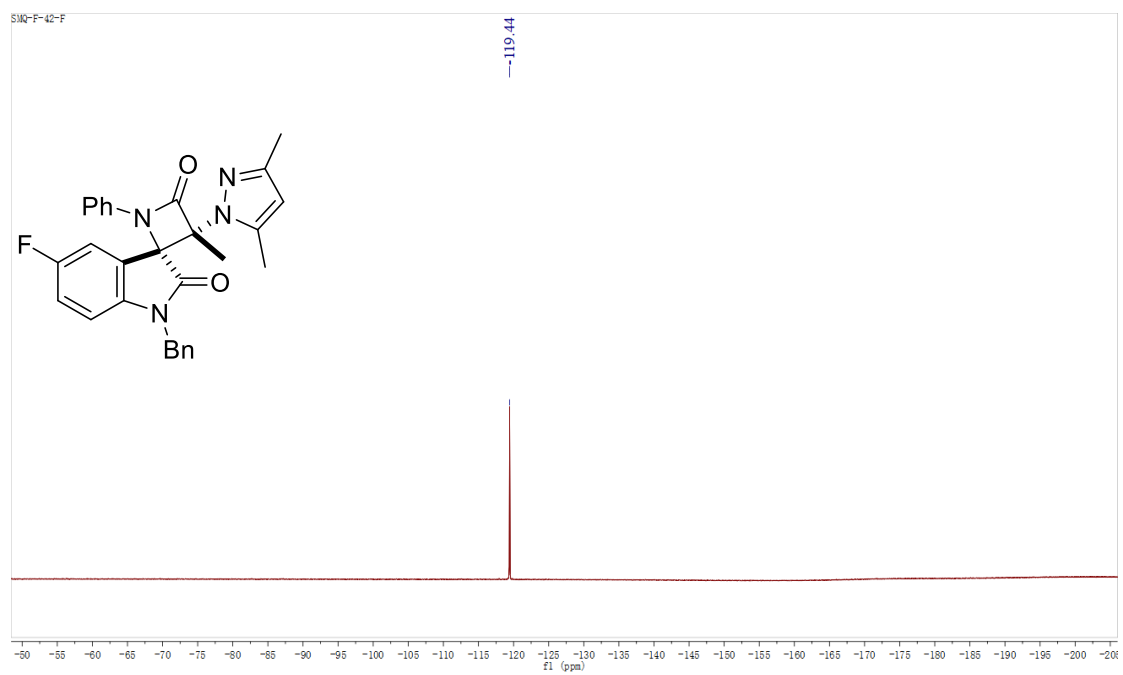

**<sup>1</sup>H NMR (500 MHz, CDCl<sub>3</sub>) and <sup>13</sup>C NMR (125 MHz, CDCl<sub>3</sub>) spectra for 3q**

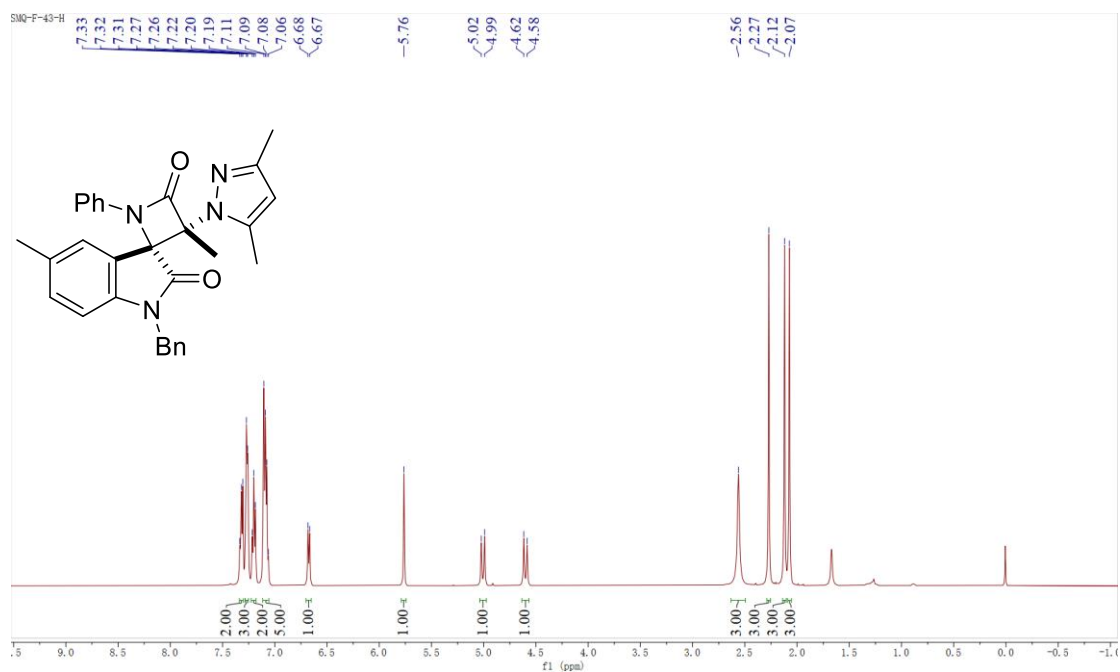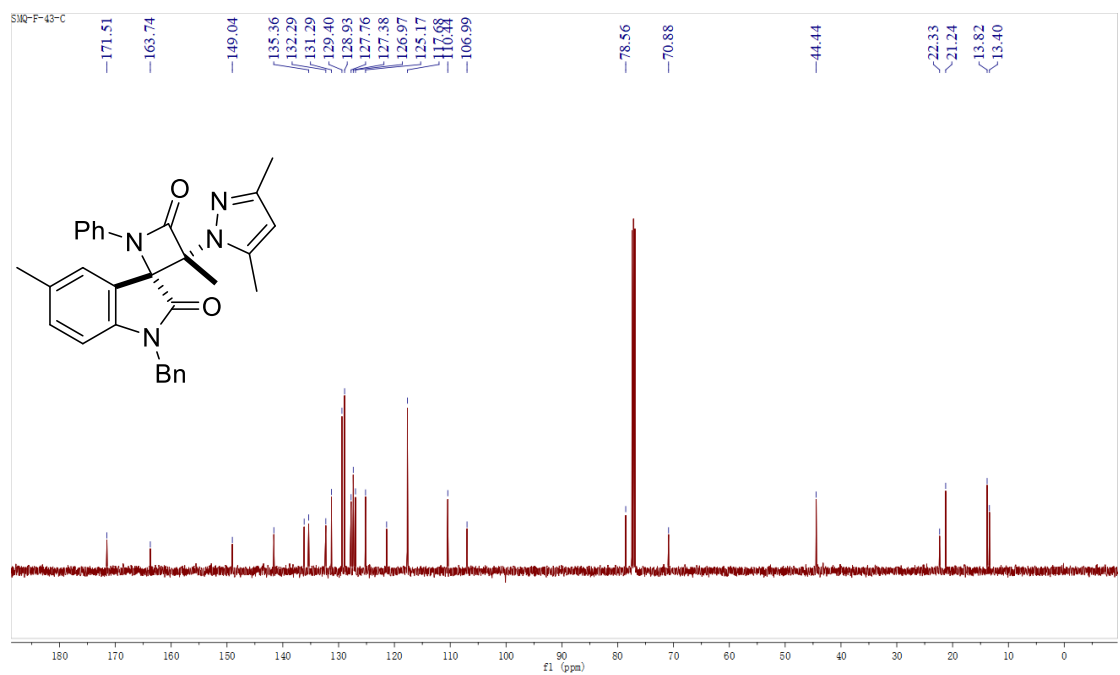

**$^1\text{H}$  NMR (400 MHz,  $\text{CDCl}_3$ ) and  $^{13}\text{C}$  NMR (125 MHz,  $\text{CDCl}_3$ ) spectra for 3r**

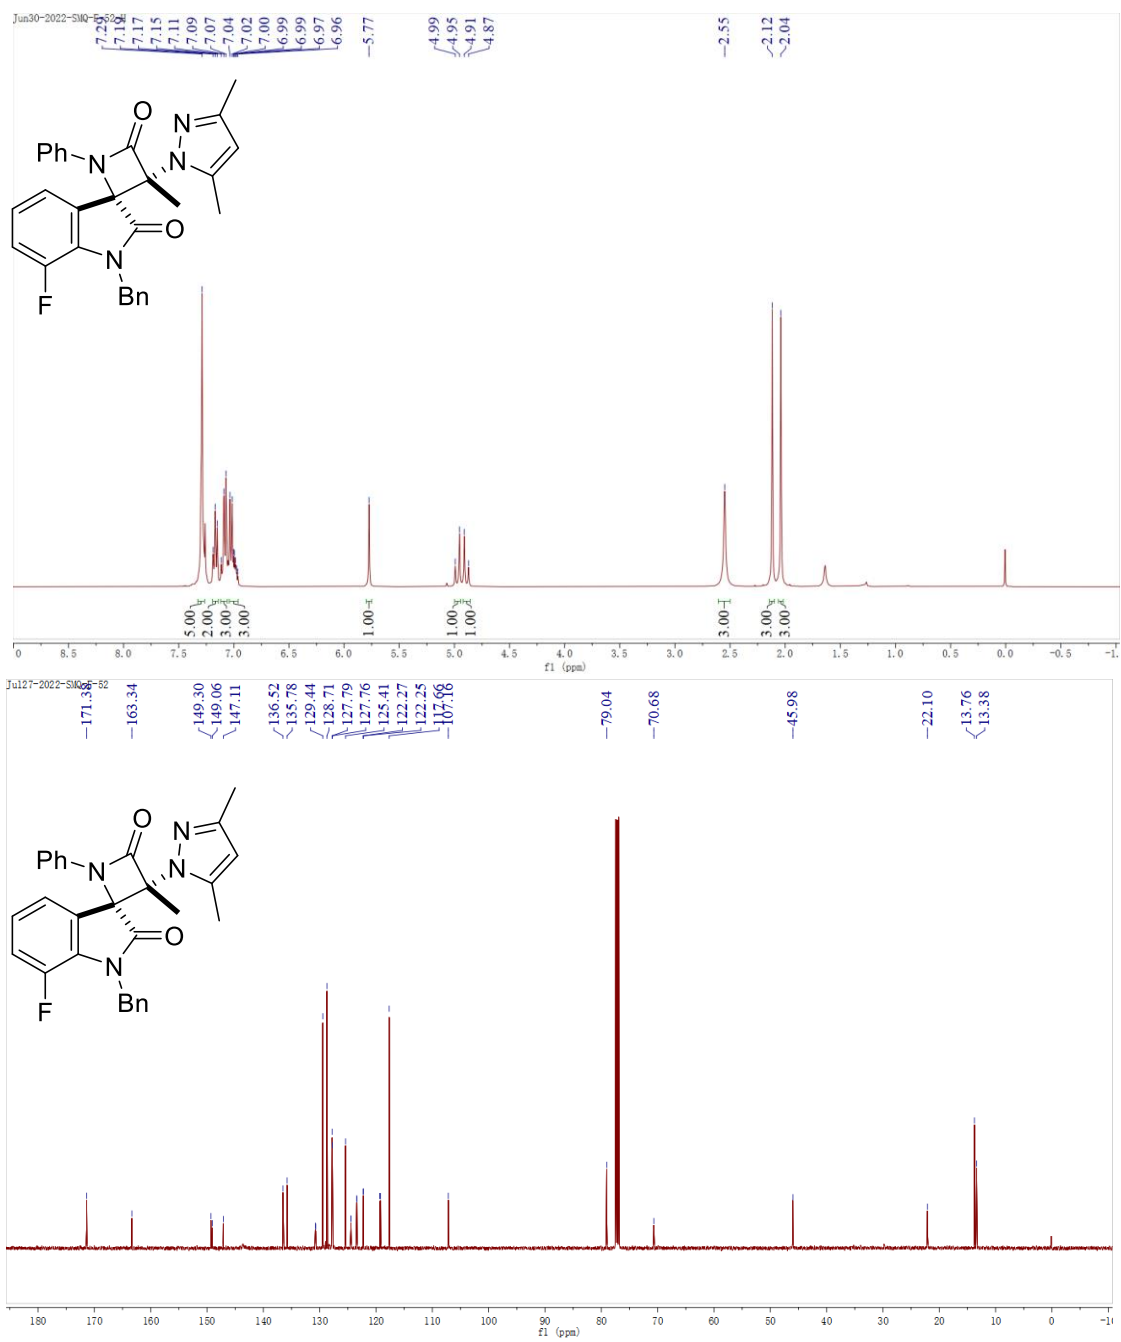



**<sup>19</sup>F NMR (376 MHz, CDCl<sub>3</sub>) spectra for 3r**

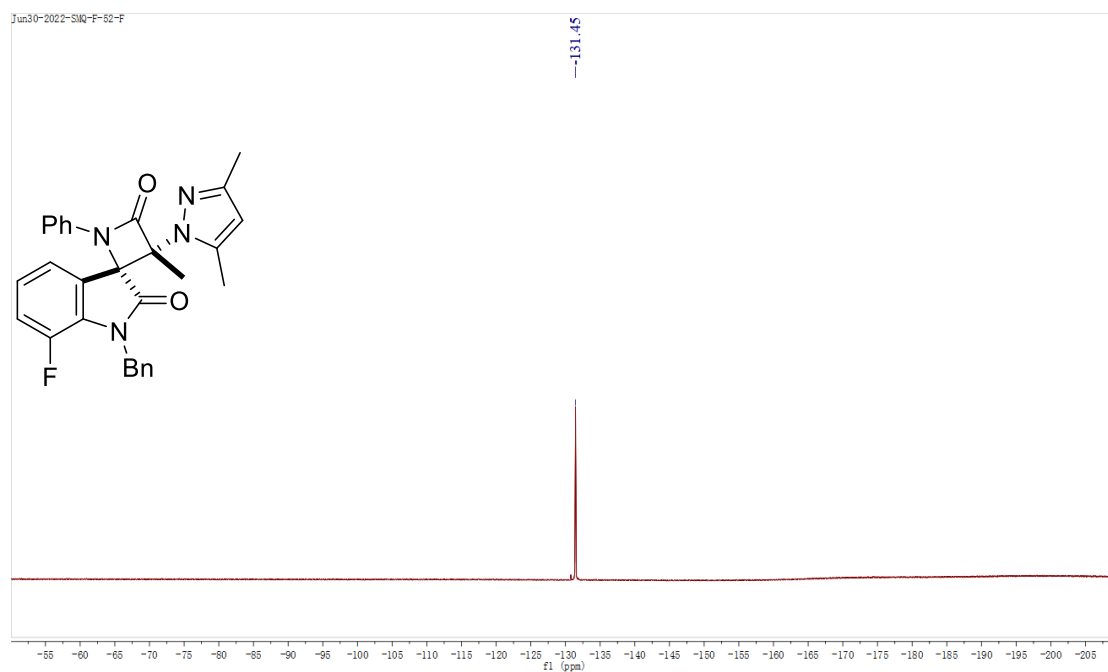

**<sup>1</sup>H NMR (500 MHz, CDCl<sub>3</sub>) and <sup>13</sup>C NMR (125 MHz, CDCl<sub>3</sub>) spectra for 3s**

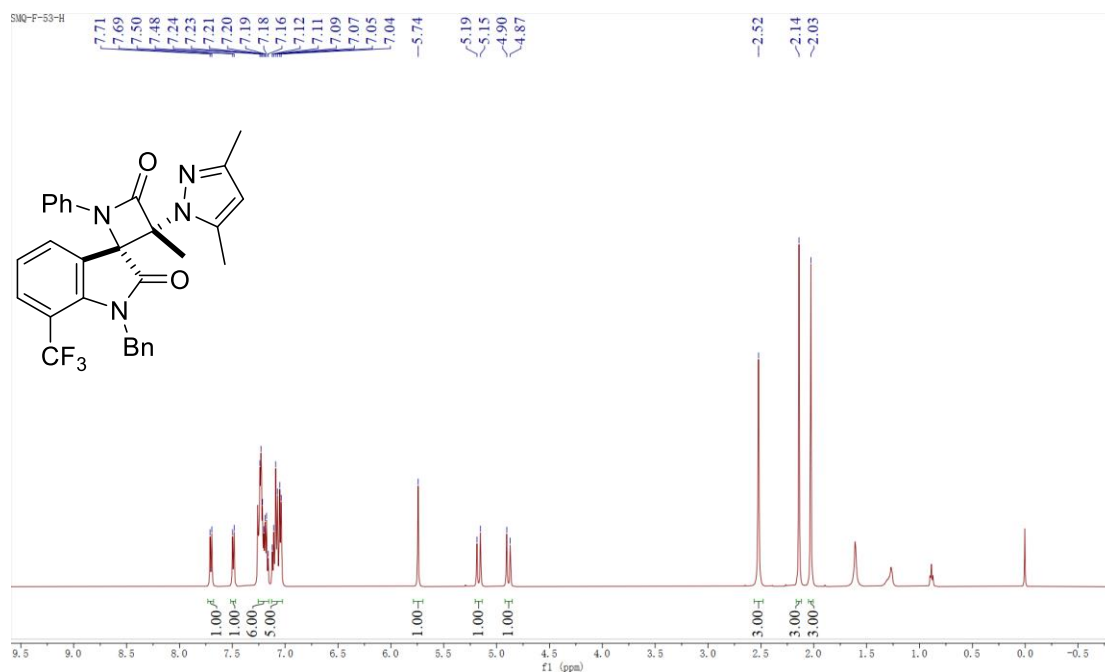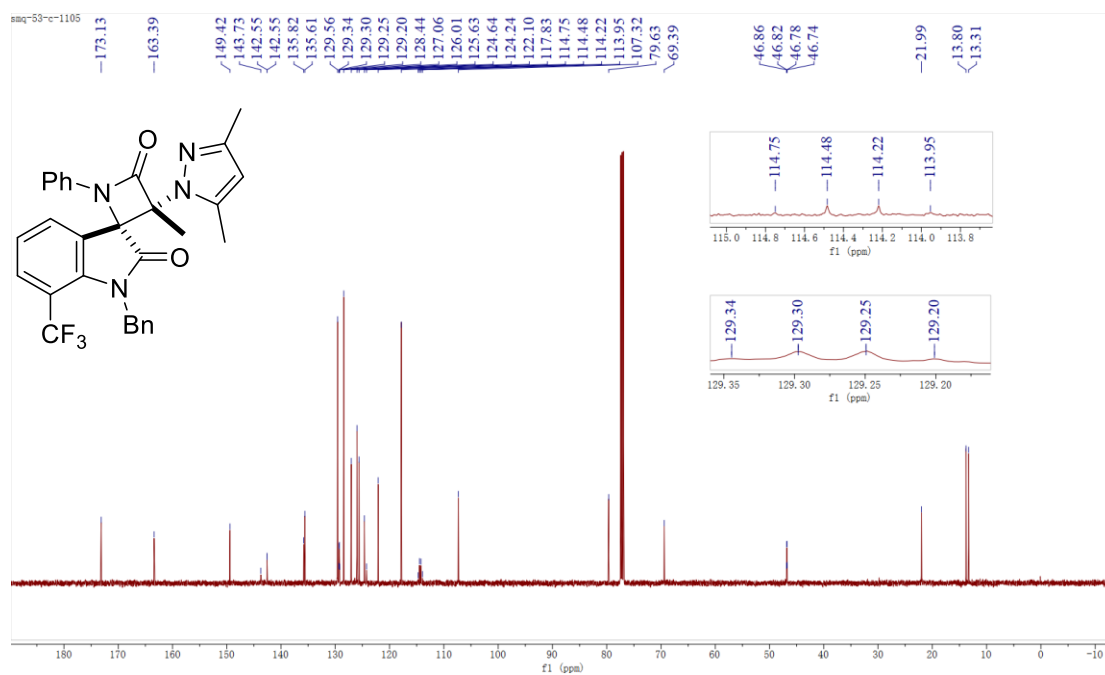

**<sup>19</sup>F NMR (376 MHz, CDCl<sub>3</sub>) spectra for 3s**

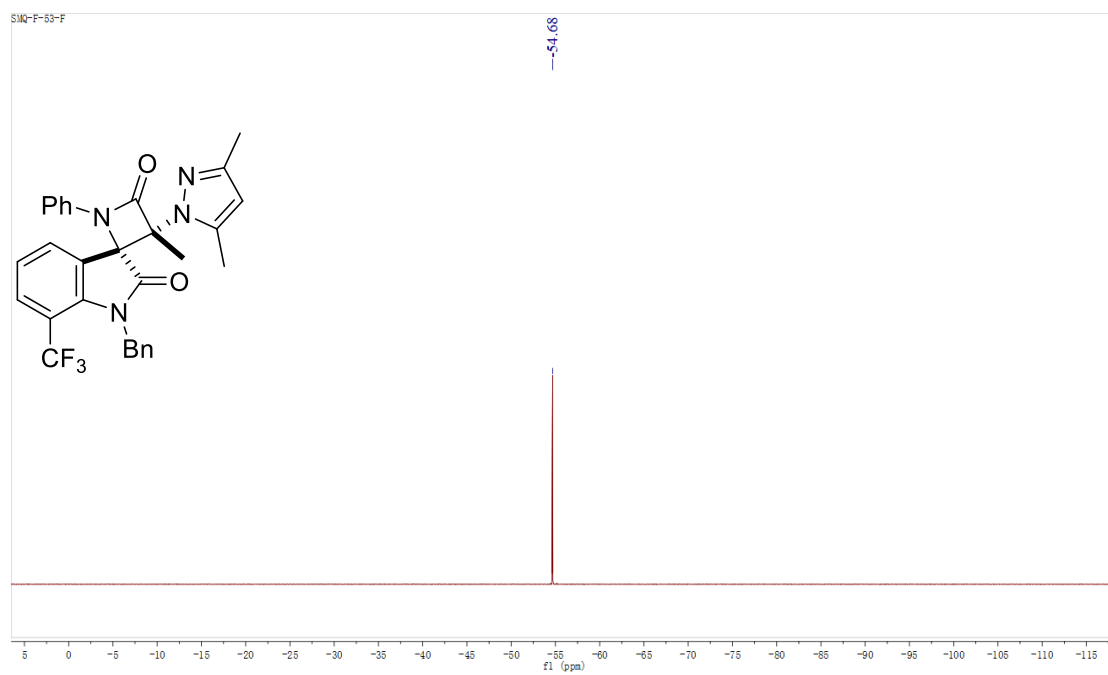

**$^1\text{H}$  NMR (400 MHz,  $\text{CDCl}_3$ ) and  $^{13}\text{C}$  NMR (100 MHz,  $\text{CDCl}_3$ ) spectra for 3t**

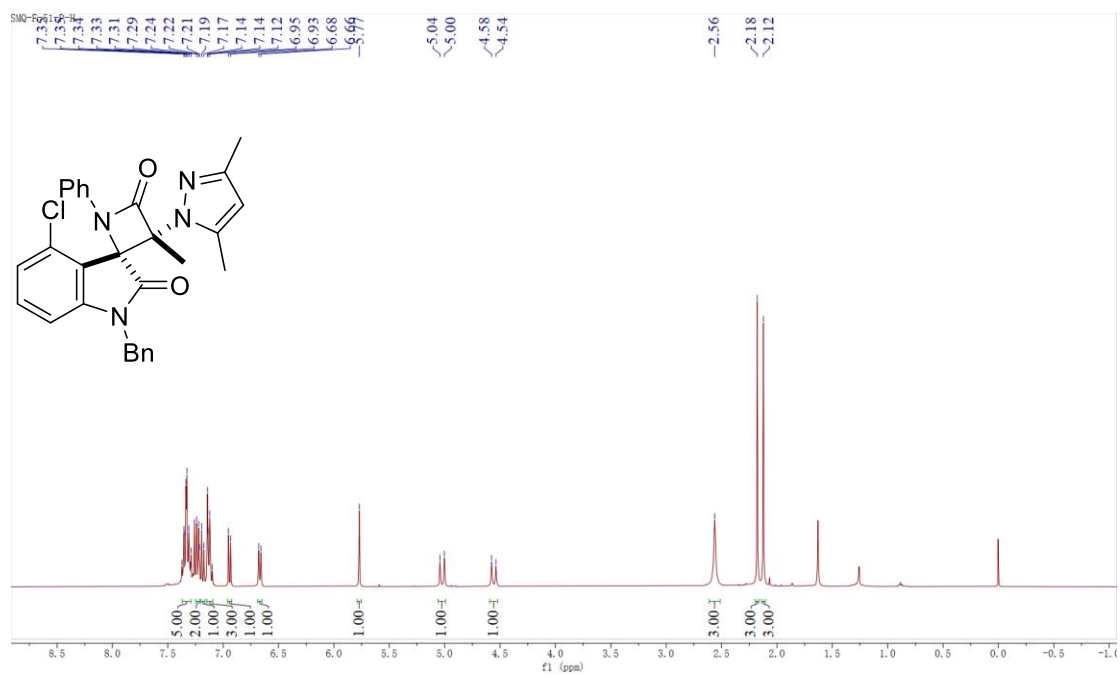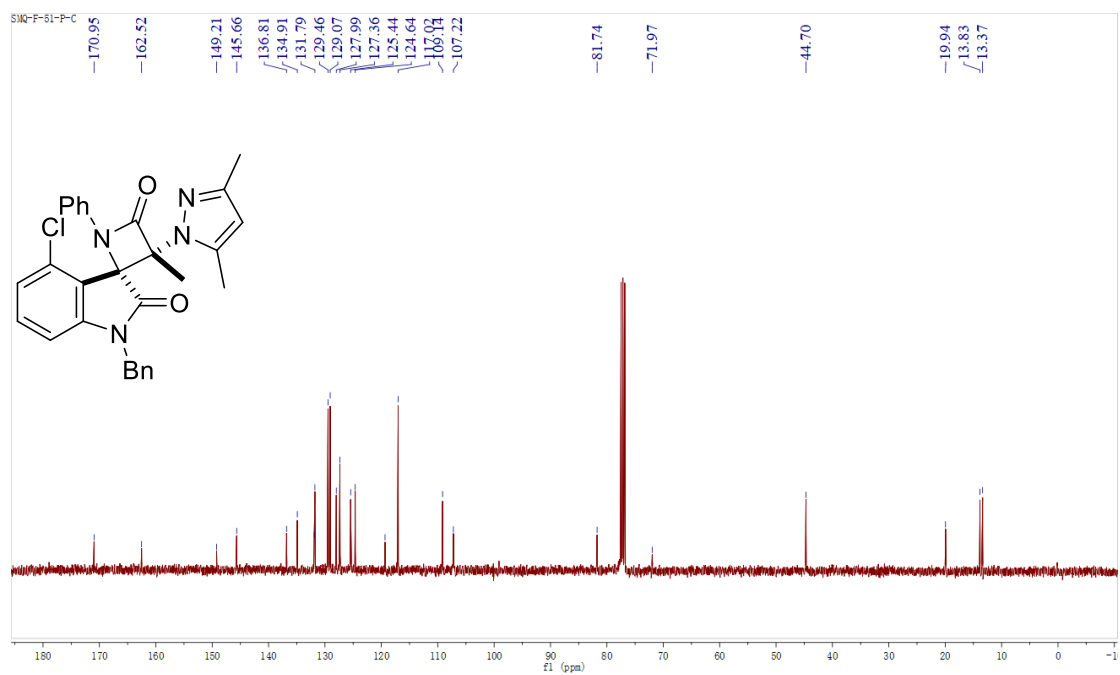

**<sup>1</sup>H NMR (500 MHz, CDCl<sub>3</sub>) and <sup>13</sup>C NMR (125 MHz, CDCl<sub>3</sub>) spectra for 4a**

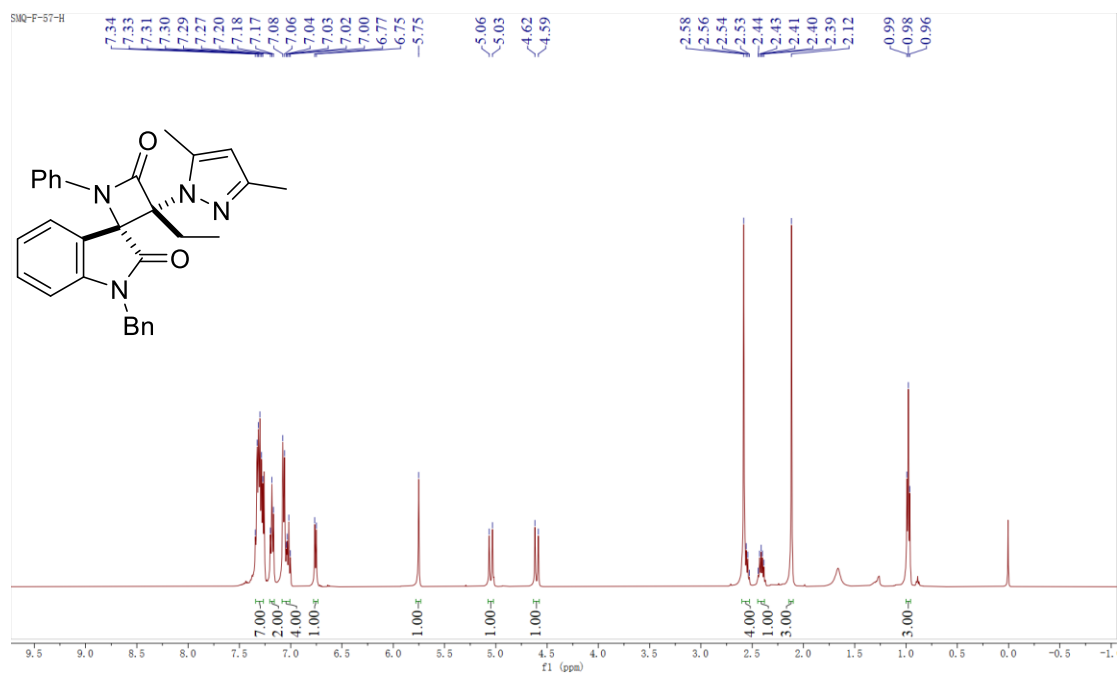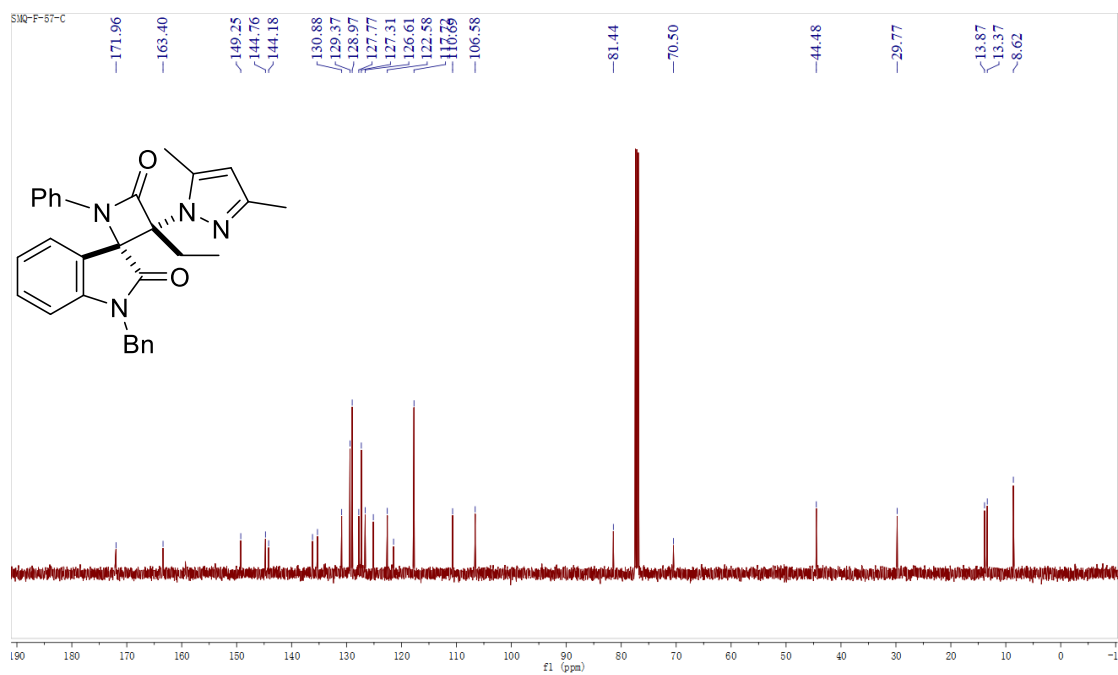

**<sup>1</sup>H NMR (400 MHz, CDCl<sub>3</sub>) and <sup>13</sup>C NMR (100 MHz, CDCl<sub>3</sub>) spectra for 4b**

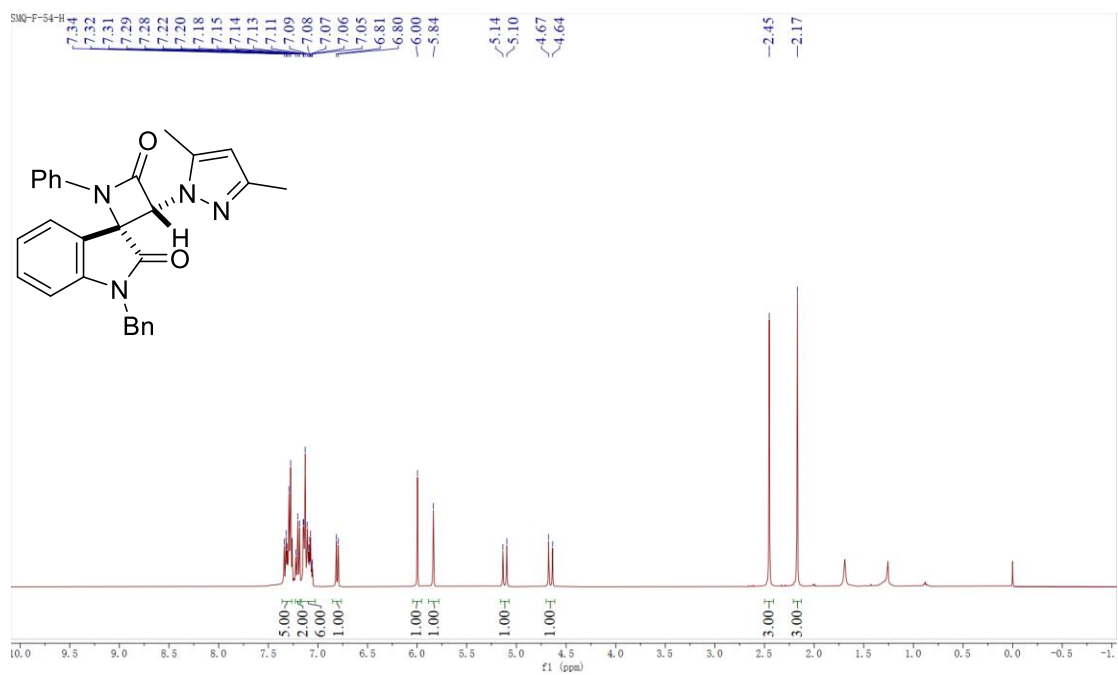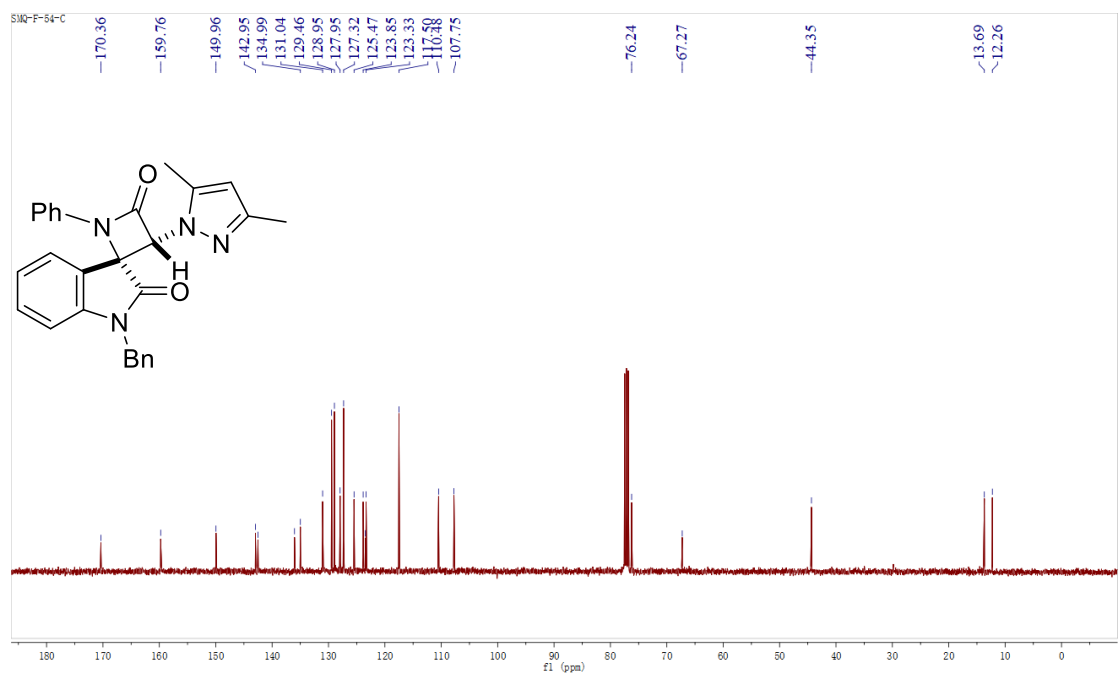

**<sup>1</sup>H NMR (500 MHz, CDCl<sub>3</sub>) and <sup>13</sup>C NMR (125 MHz, CDCl<sub>3</sub>) spectra for 4c**

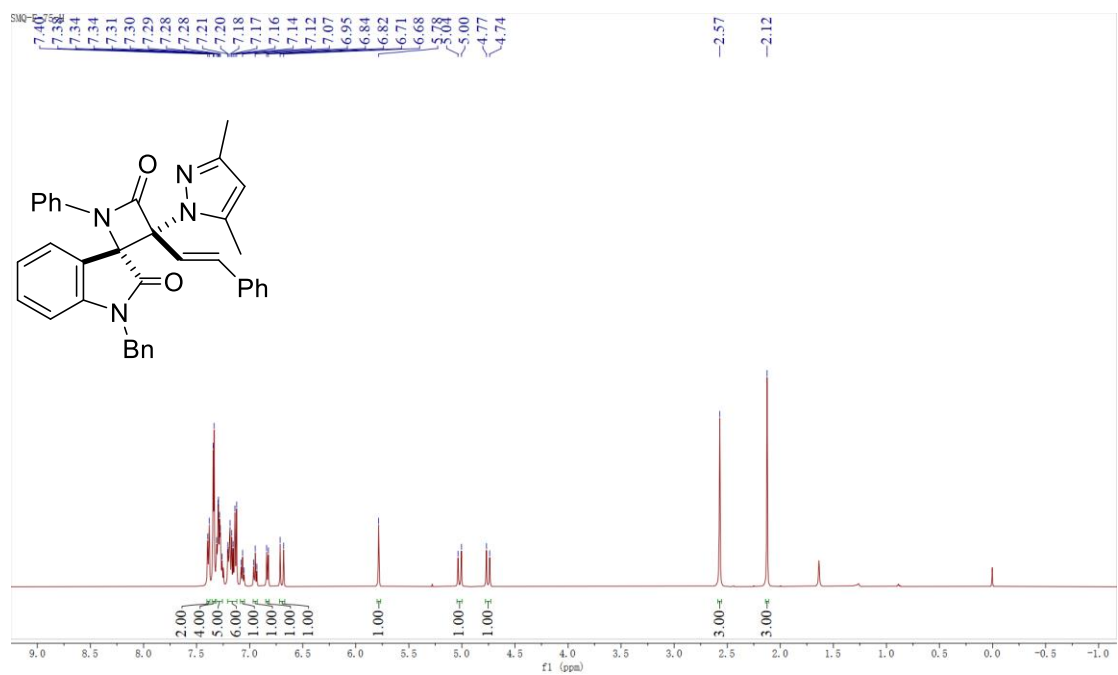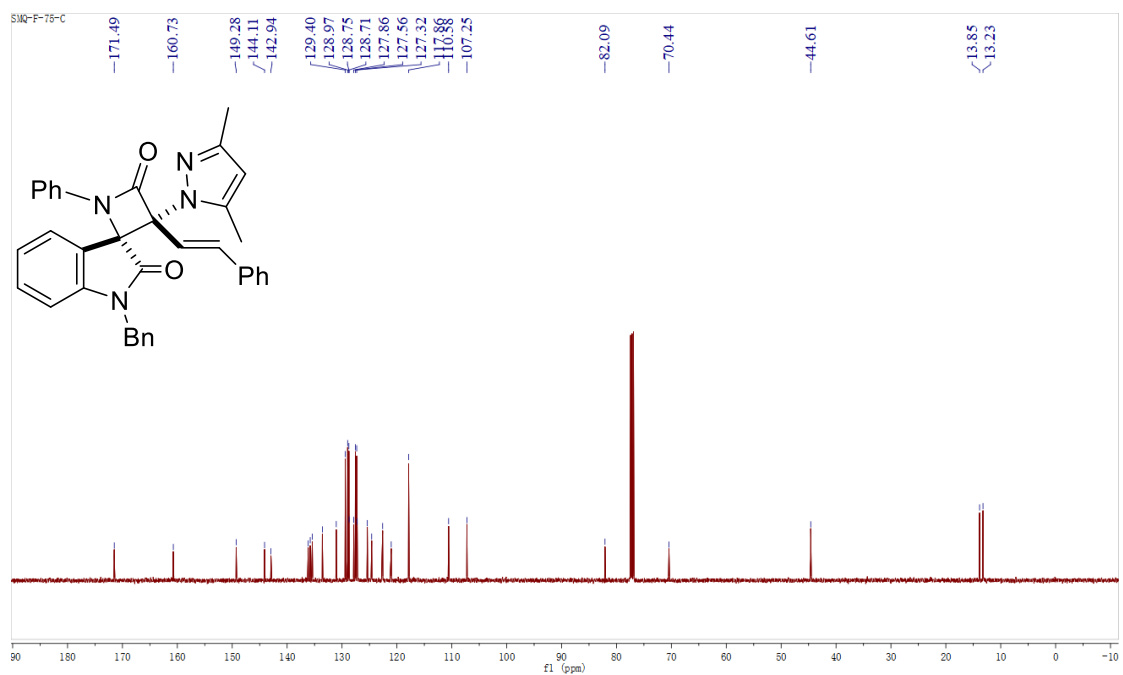

**<sup>1</sup>H NMR (400 MHz, CDCl<sub>3</sub>) and <sup>13</sup>C NMR (125 MHz, CDCl<sub>3</sub>) spectra for 5a**

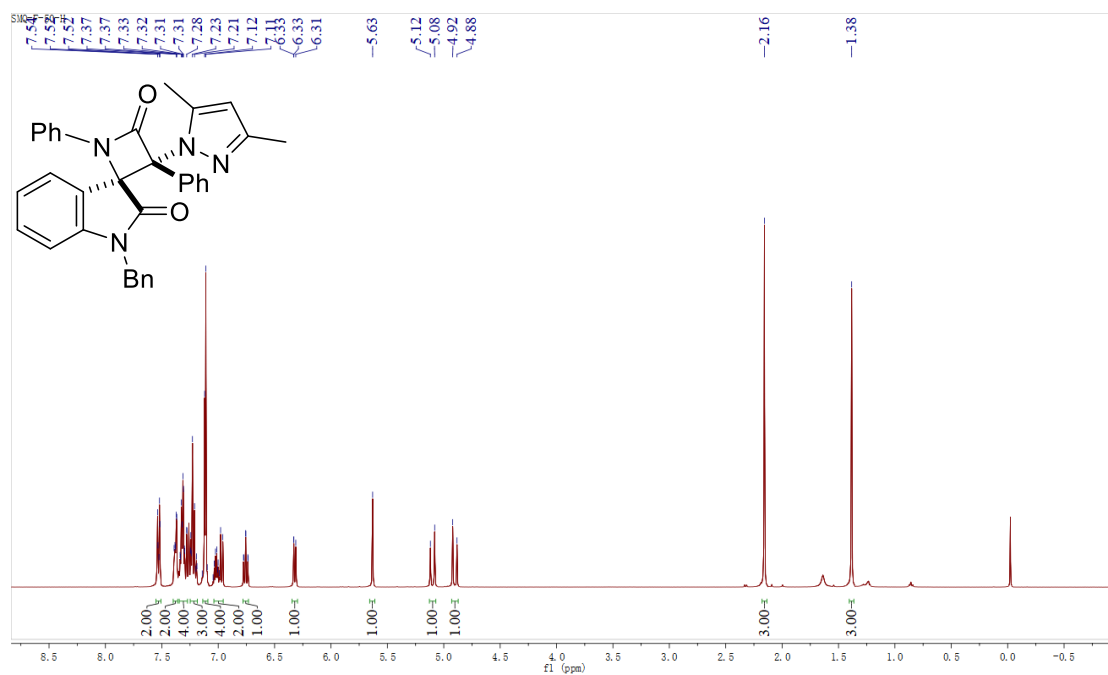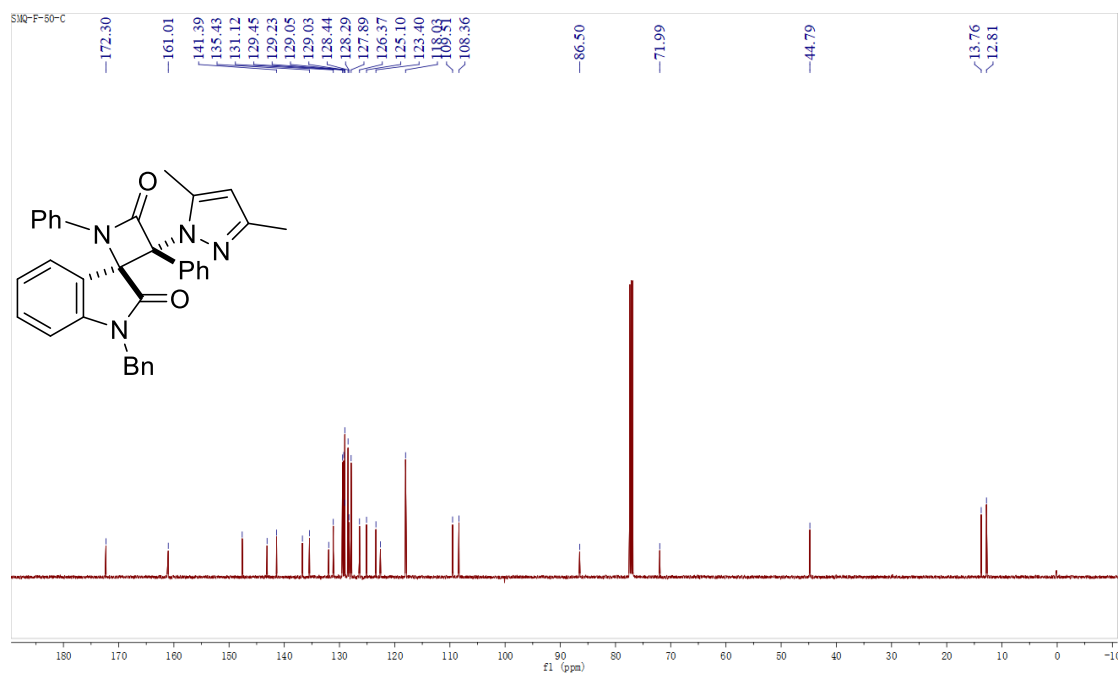



**<sup>1</sup>H NMR (500 MHz, CDCl<sub>3</sub>) and <sup>13</sup>C NMR (125 MHz, CDCl<sub>3</sub>) spectra for 5b**

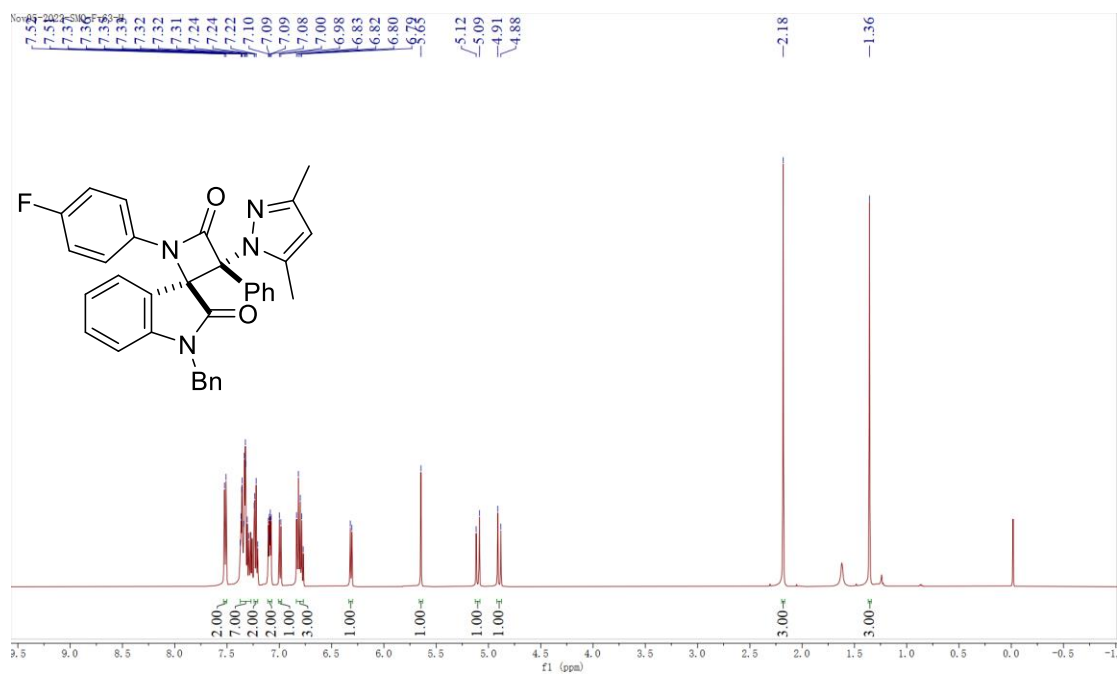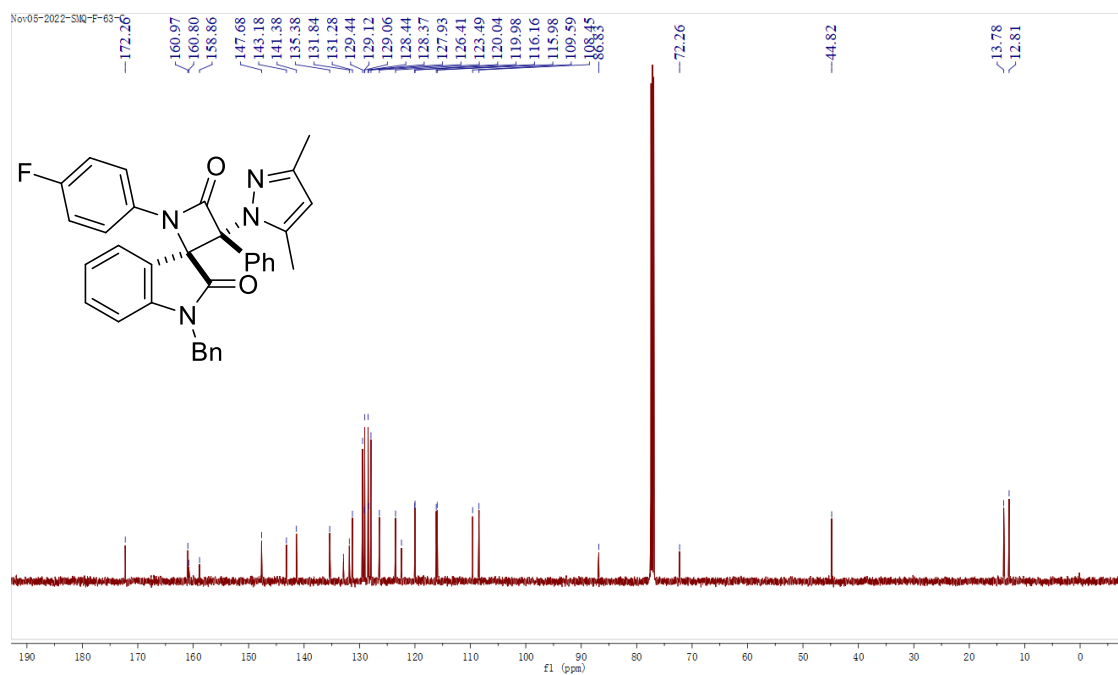

**$^{19}\text{F}$  NMR (376 MHz,  $\text{CDCl}_3$ ) spectra for 5b**

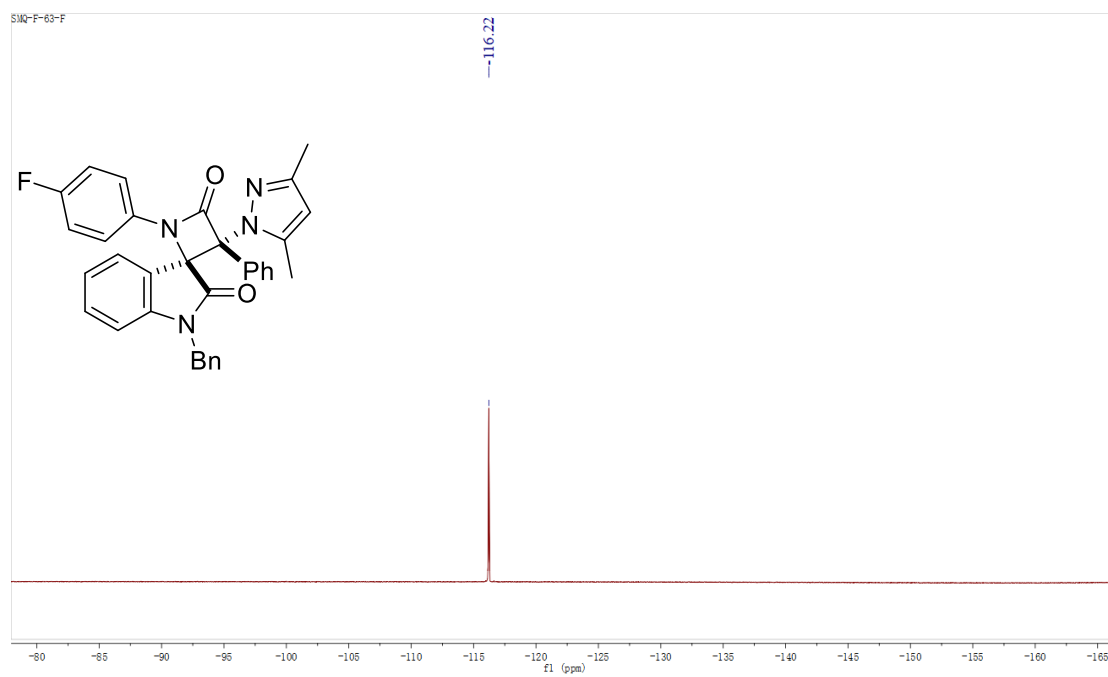

**<sup>1</sup>H NMR (500 MHz, CDCl<sub>3</sub>) and <sup>13</sup>C NMR (100 MHz, CDCl<sub>3</sub>) spectra for 5c**

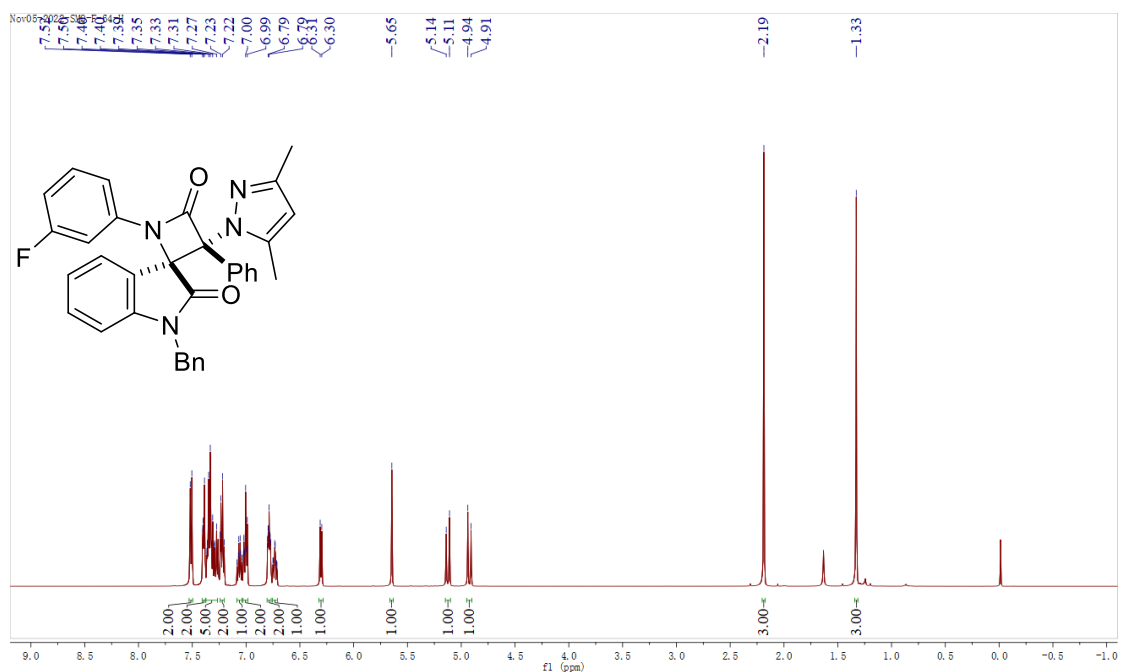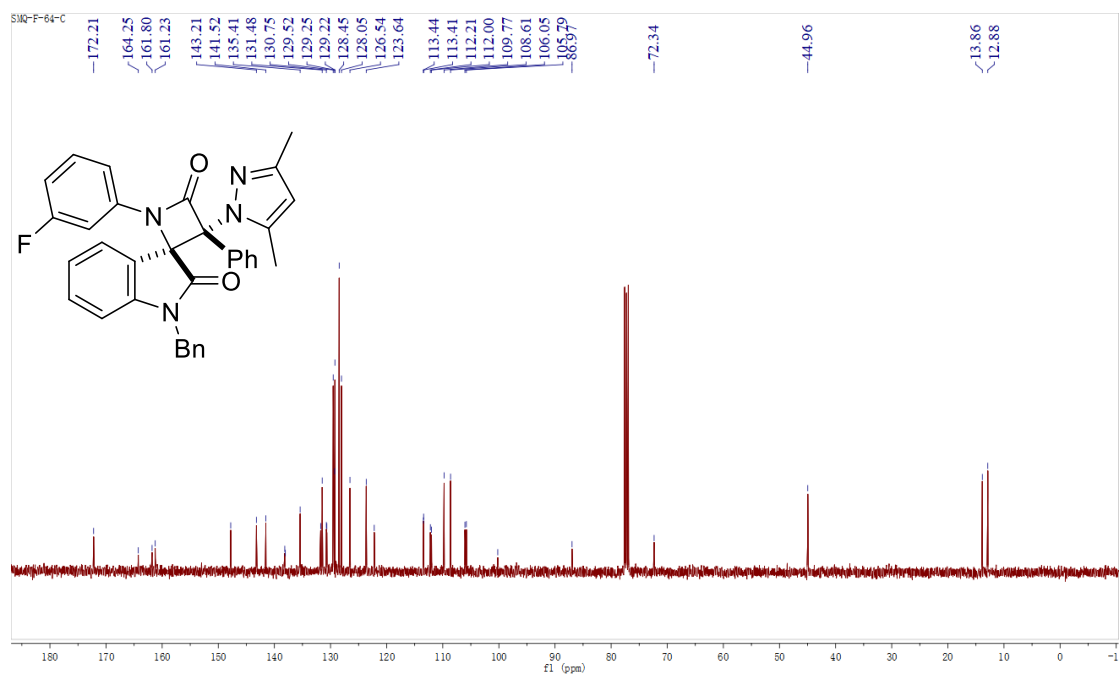

**$^{19}\text{F}$  NMR (500 MHz,  $\text{CDCl}_3$ ) spectra for 5c**

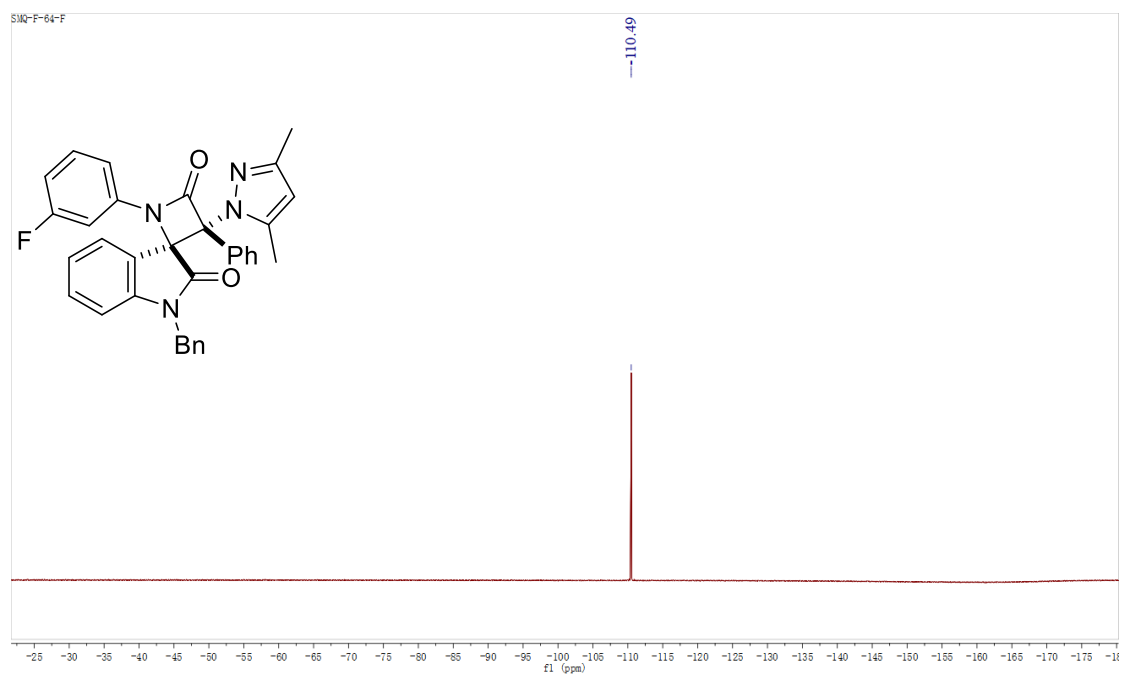

**<sup>1</sup>H NMR (400 MHz, CDCl<sub>3</sub>) and <sup>13</sup>C NMR (100 MHz, CDCl<sub>3</sub>) spectra for 5d**

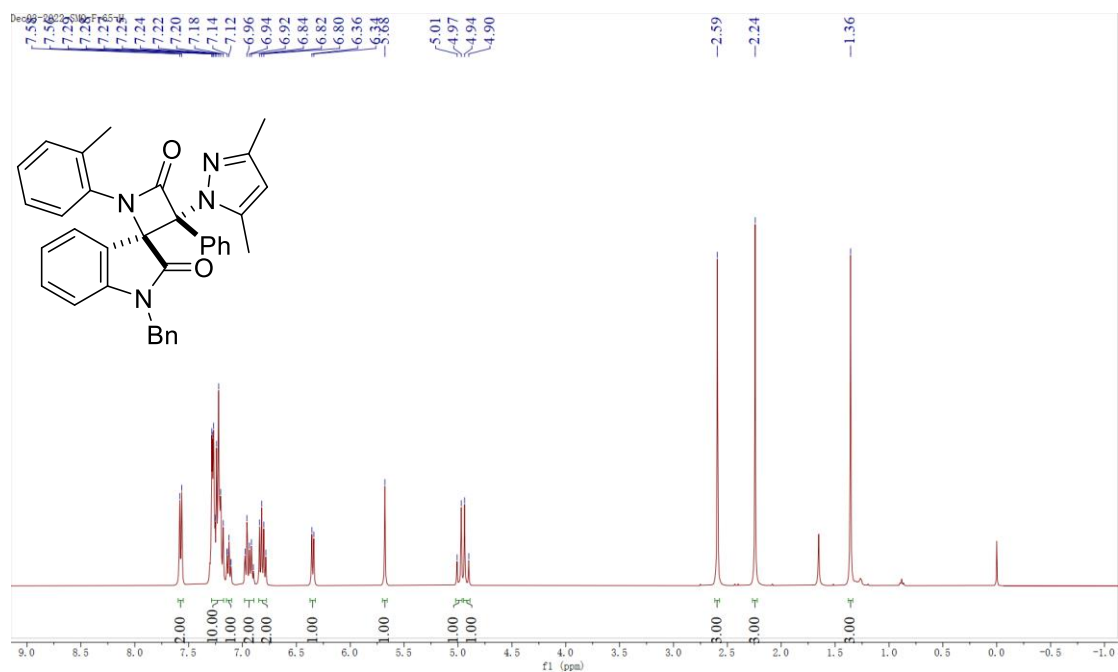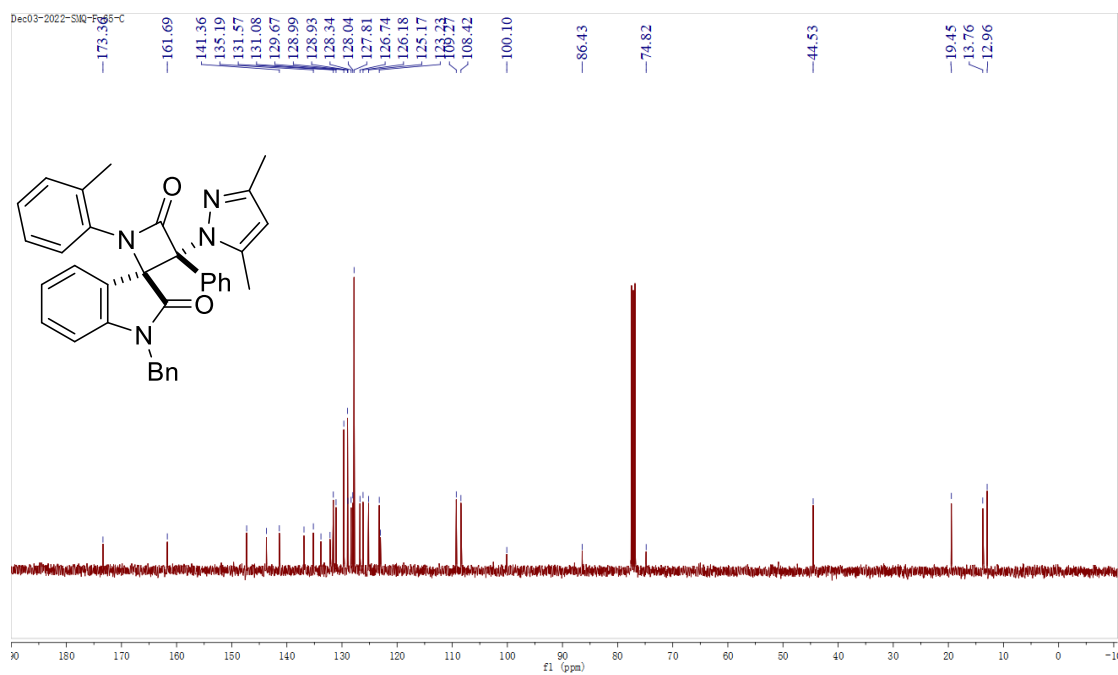

**$^1\text{H}$  NMR (500 MHz,  $\text{CDCl}_3$ ) and  $^{13}\text{C}$  NMR (125 MHz,  $\text{CDCl}_3$ ) spectra for 5e**

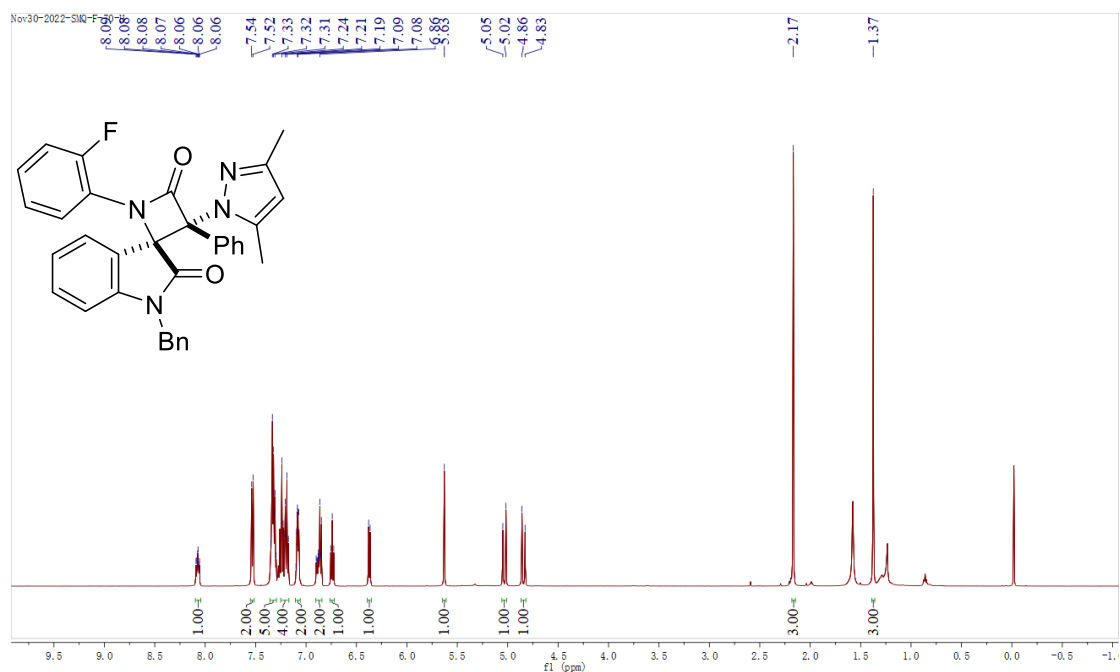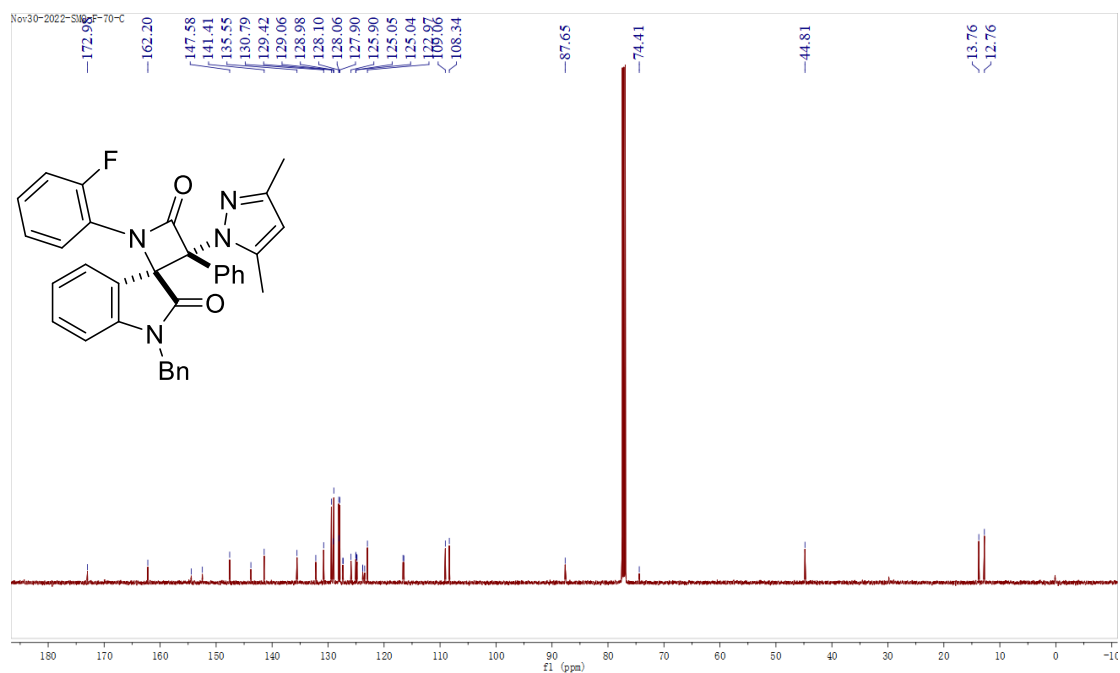

**<sup>19</sup>F NMR (376 MHz, CDCl<sub>3</sub>) spectra for 5e**

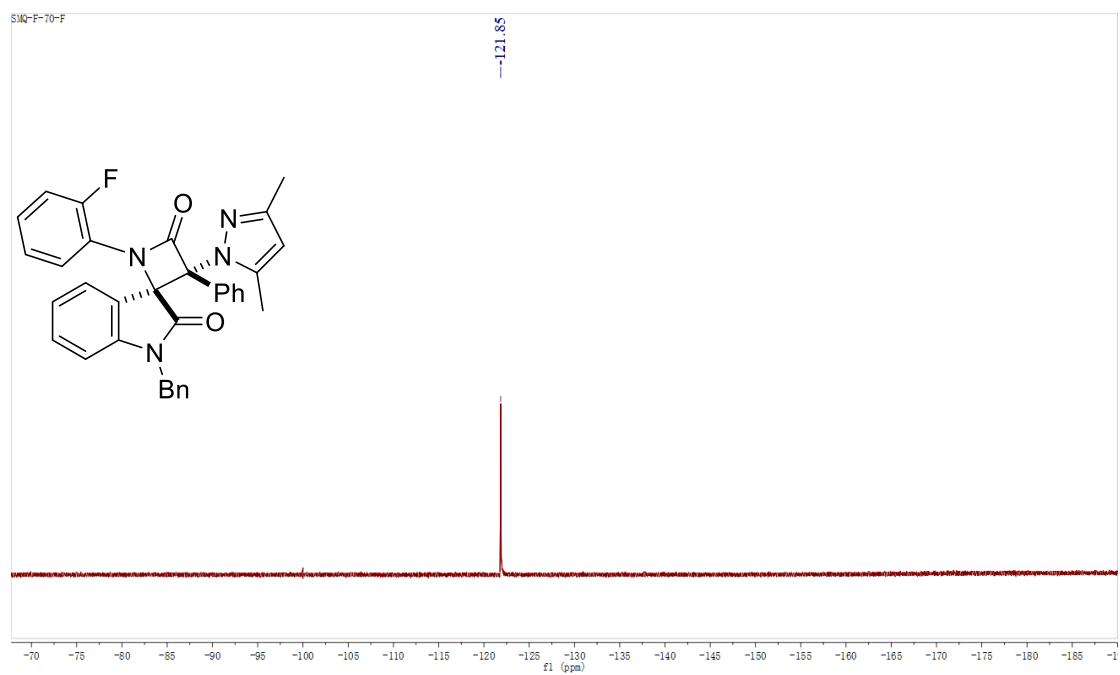

**$^1\text{H}$  NMR (500 MHz,  $\text{CDCl}_3$ ) and  $^{13}\text{C}$  NMR (125 MHz,  $\text{CDCl}_3$ ) spectra for 5f**

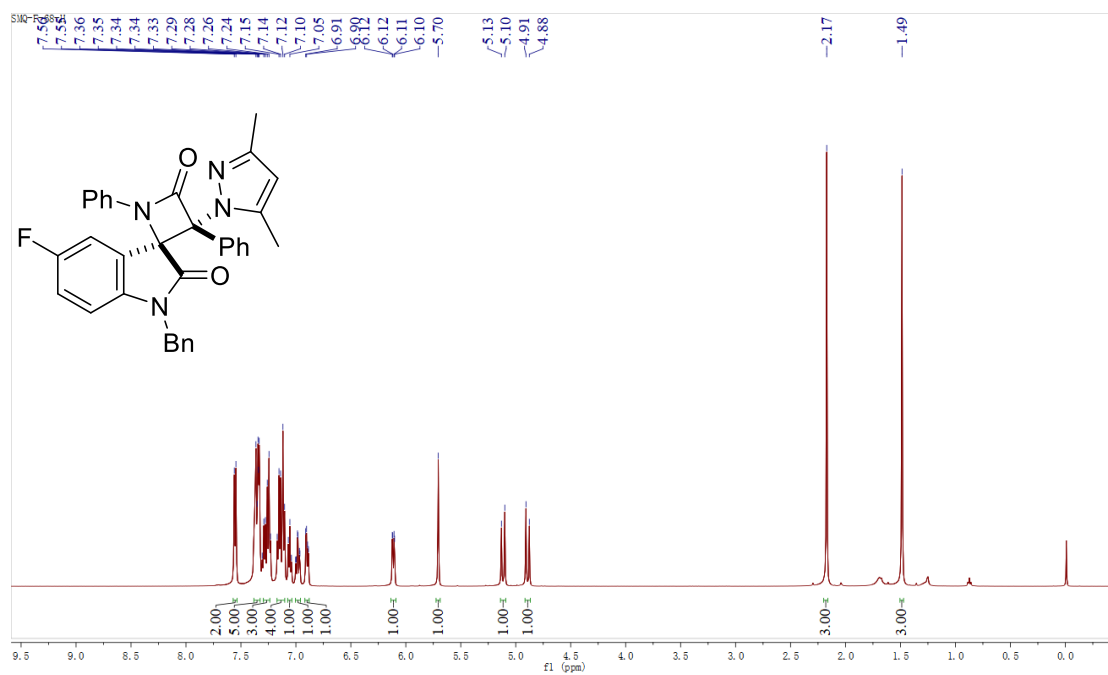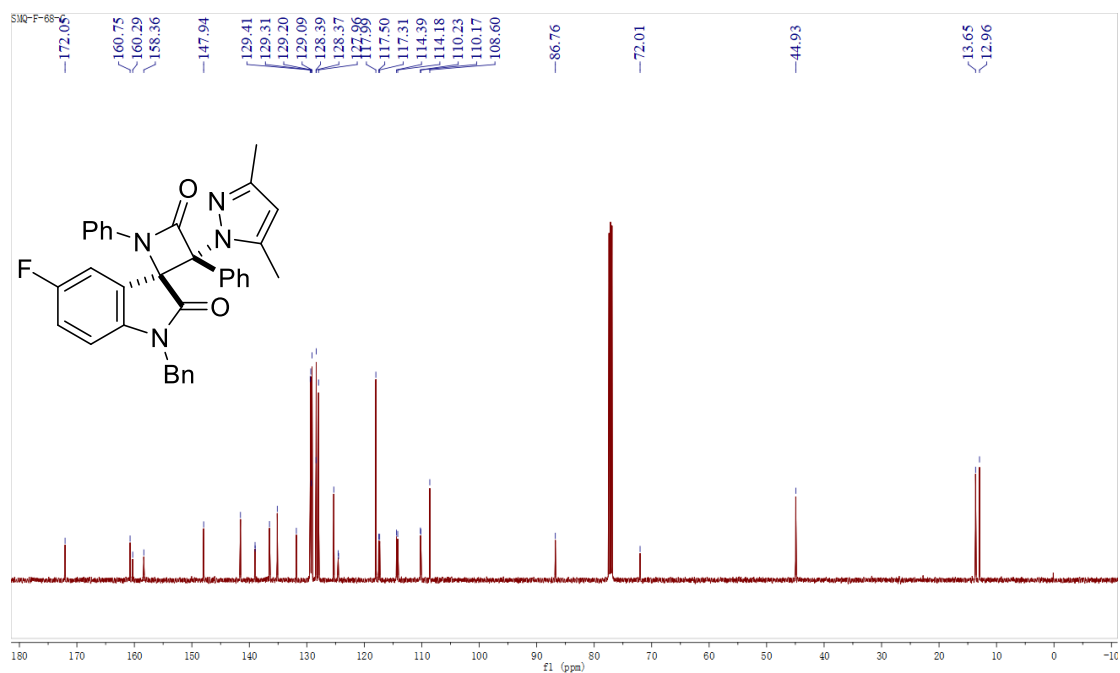



**<sup>19</sup>F NMR (376 MHz, CDCl<sub>3</sub>) spectra for 5f**

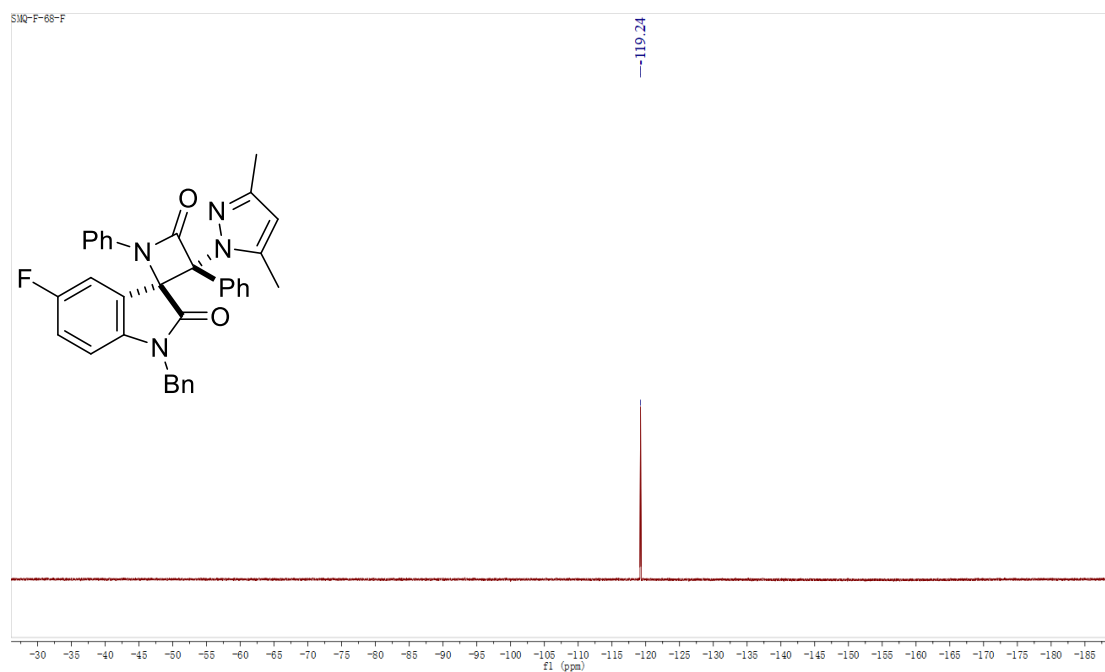

**<sup>1</sup>H NMR (500 MHz, CDCl<sub>3</sub>) and <sup>13</sup>C NMR (125 MHz, CDCl<sub>3</sub>) spectra for 5g**

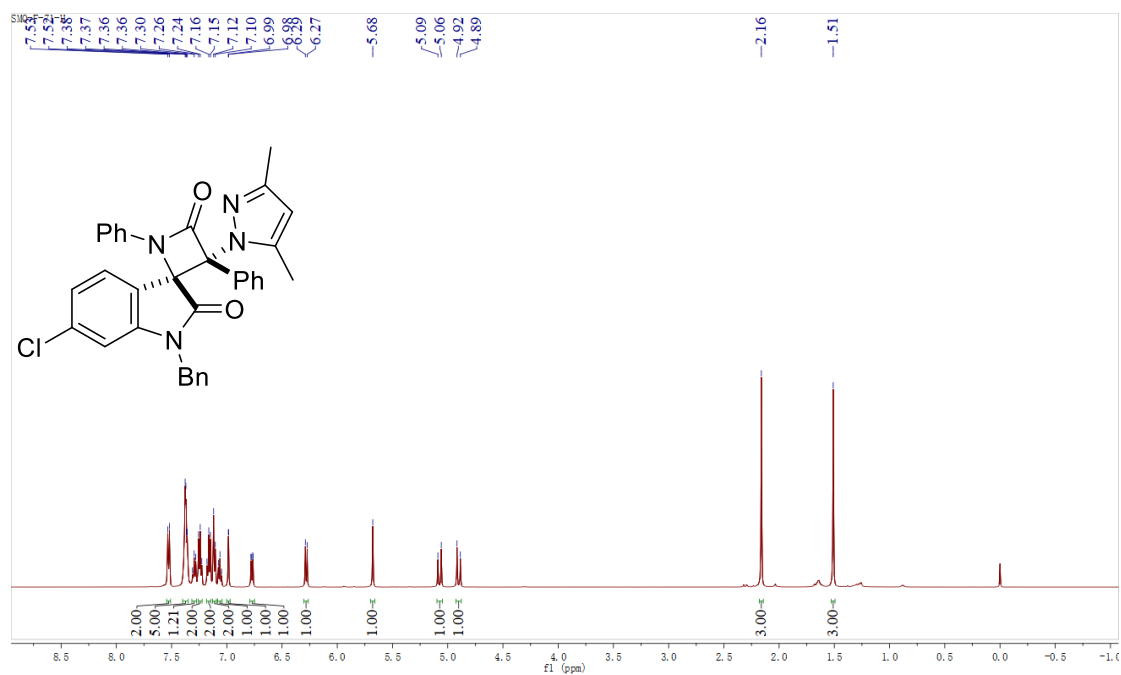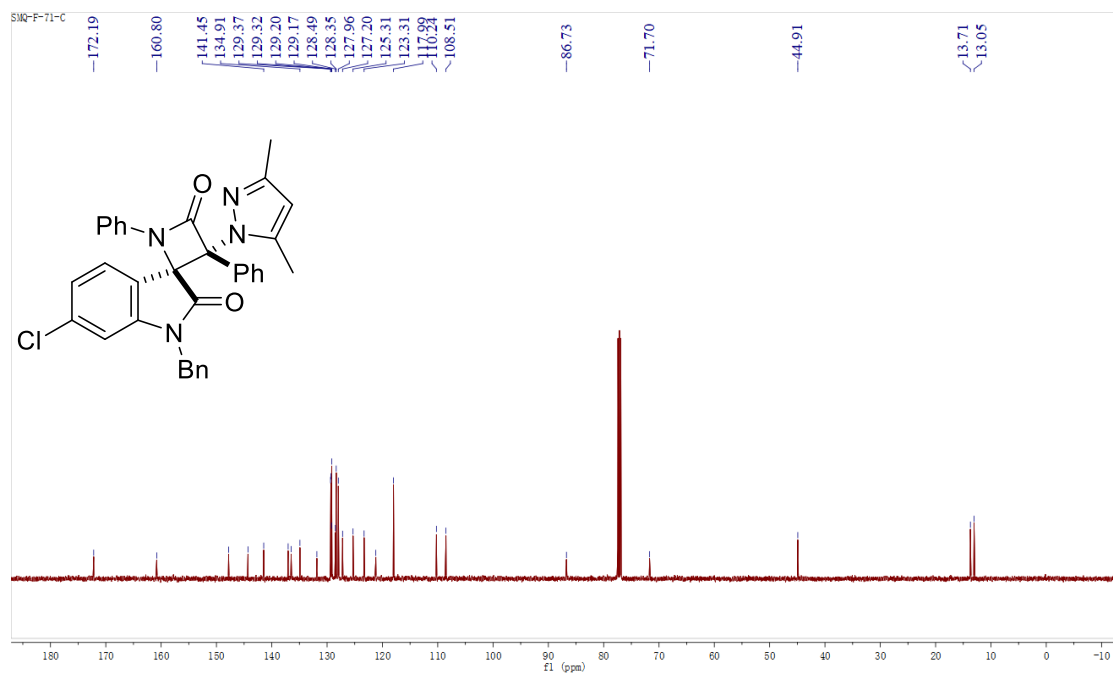

<sup>1</sup>H NMR (500 MHz, CDCl<sub>3</sub>) and <sup>13</sup>C NMR (125 MHz, CDCl<sub>3</sub>) spectra for 5h

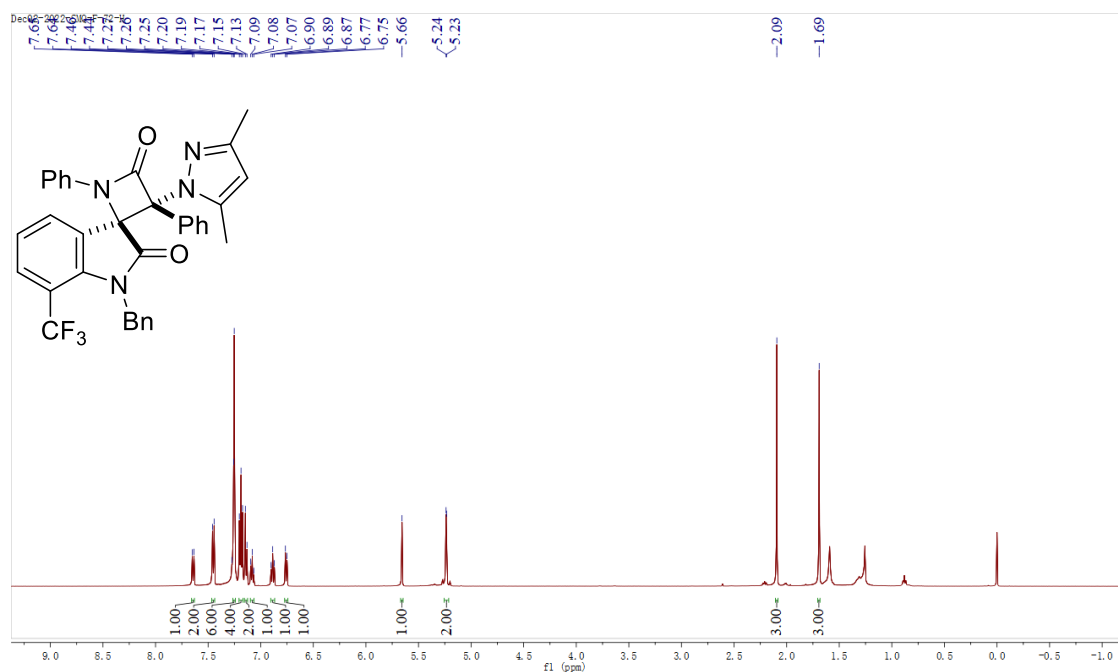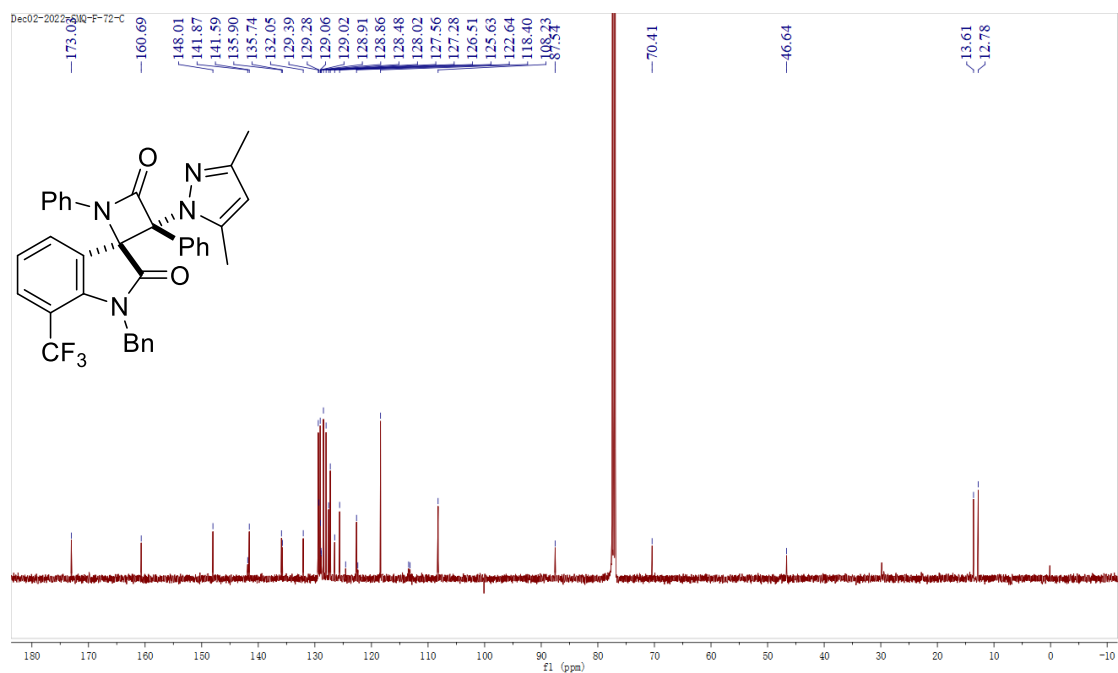

**<sup>19</sup>F NMR (376MHz, CDCl<sub>3</sub>) spectra for 5h**

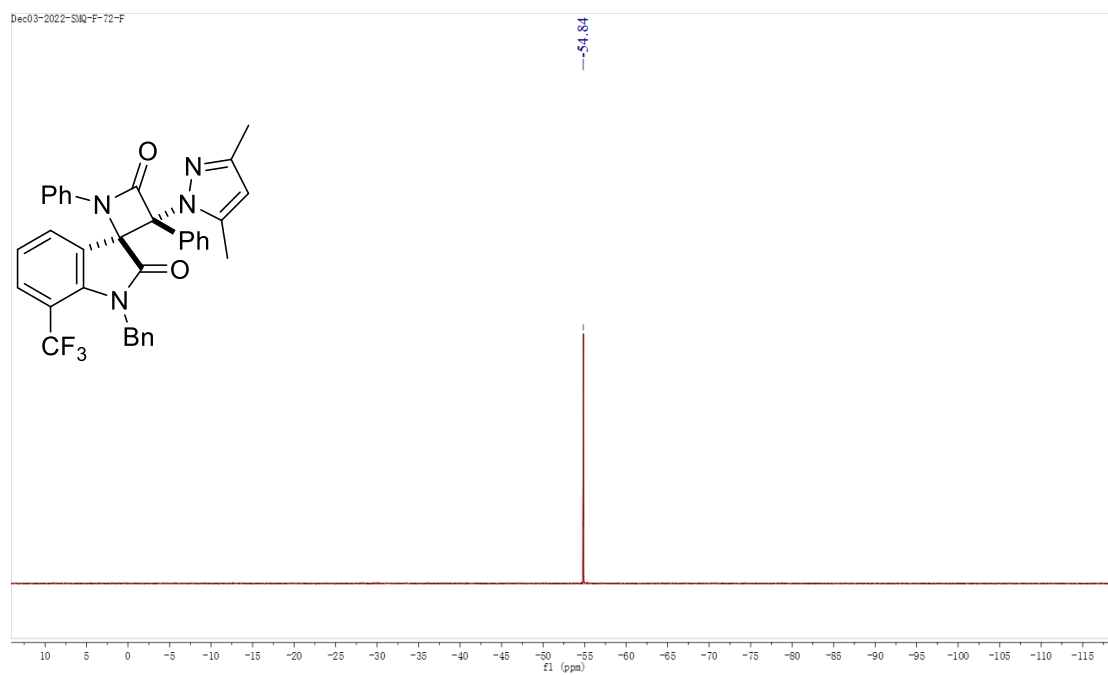

**<sup>1</sup>H NMR (400 MHz, CDCl<sub>3</sub>) and <sup>13</sup>C NMR (100 MHz, CDCl<sub>3</sub>) spectra for 5i**

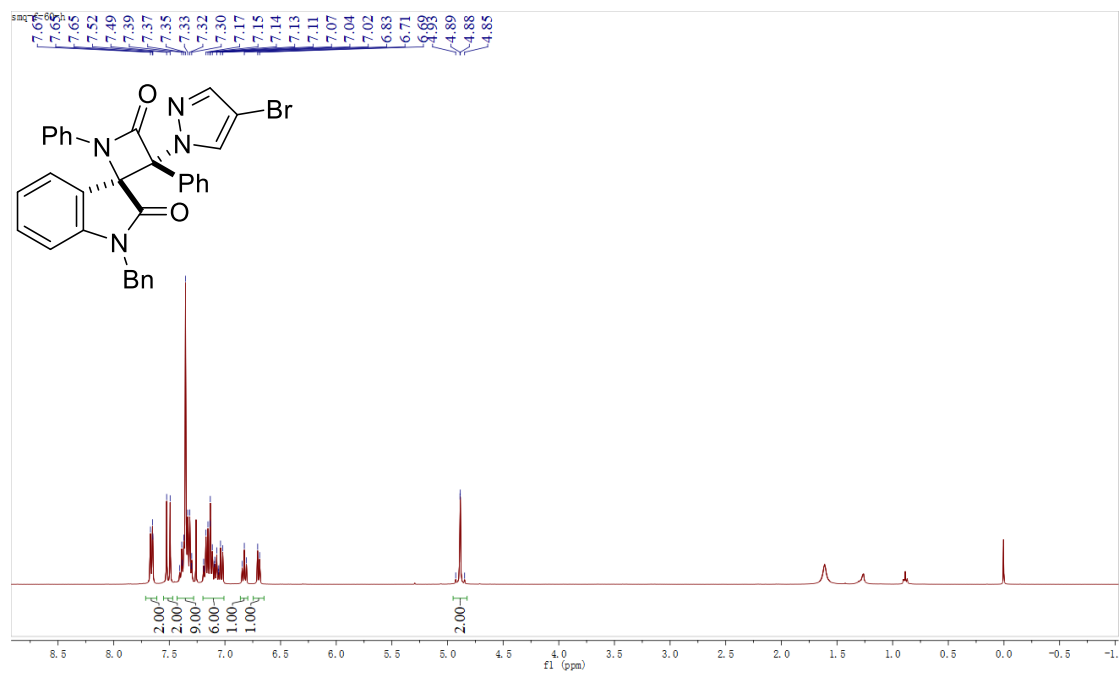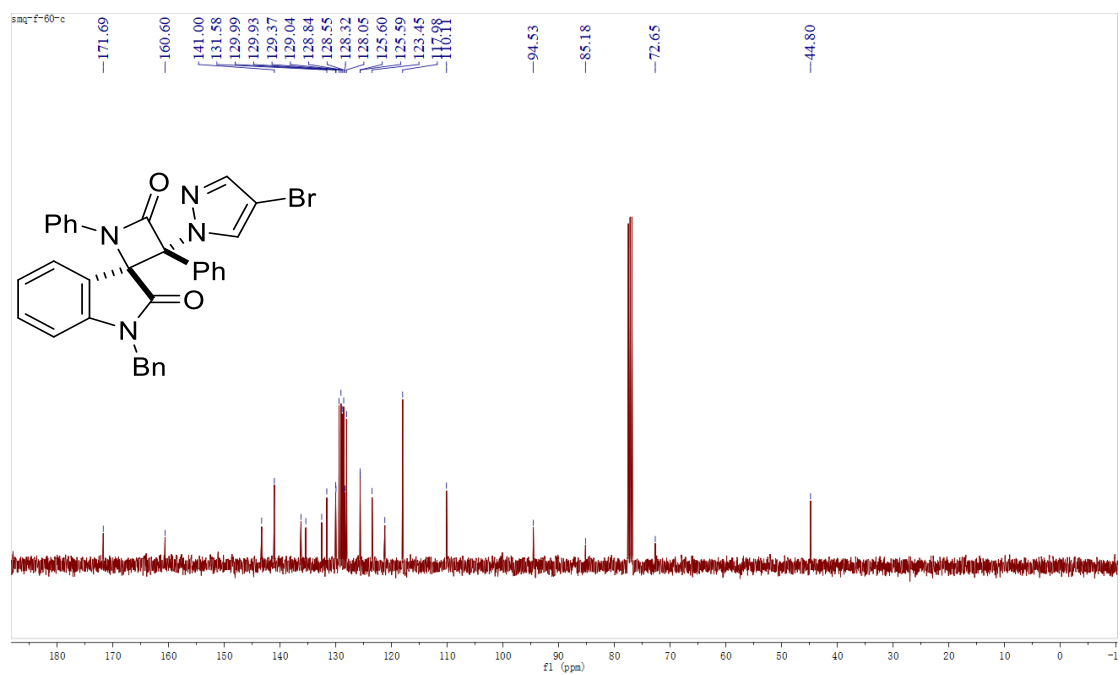

**$^1\text{H}$  NMR (400 MHz,  $\text{CDCl}_3$ ) and  $^{13}\text{C}$  NMR (100 MHz,  $\text{CDCl}_3$ ) spectra for 5j**

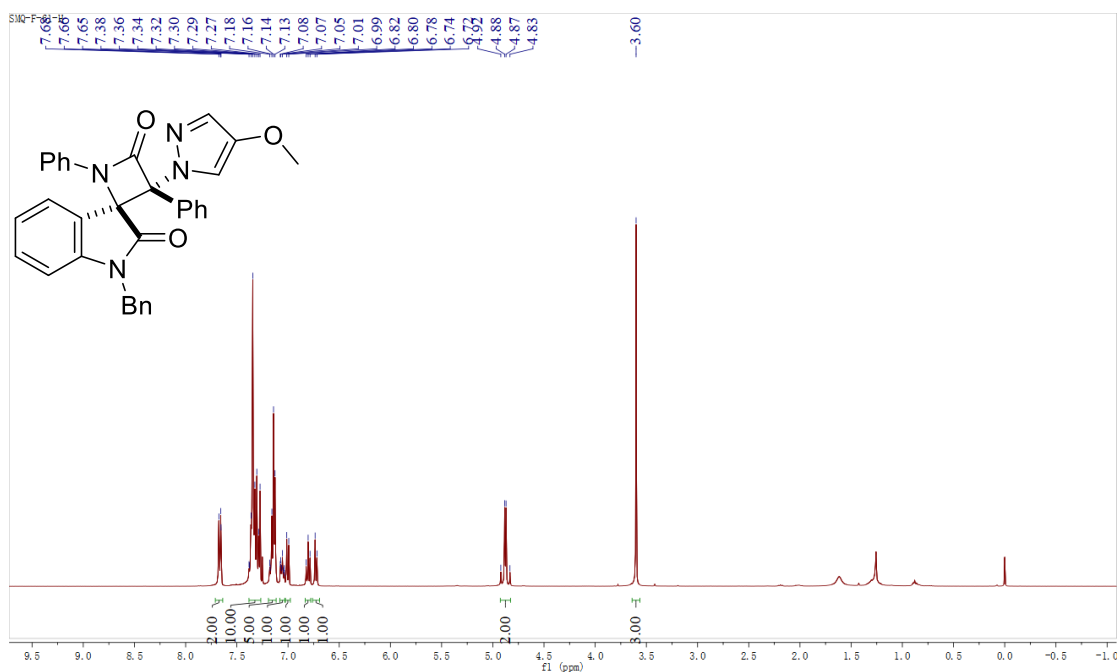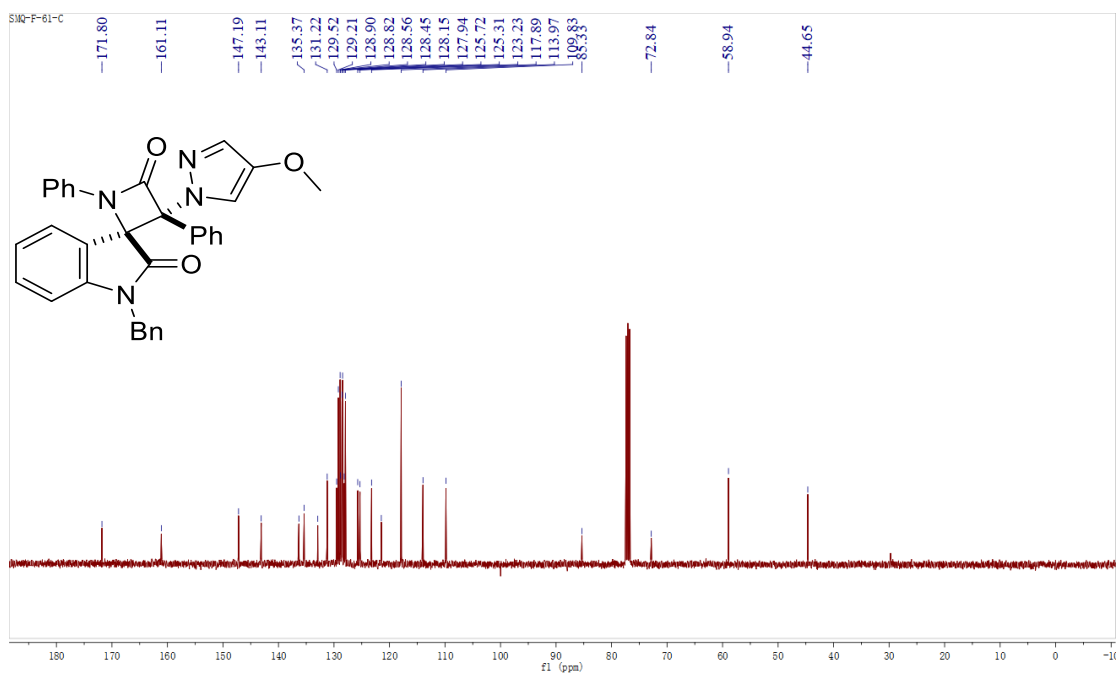

**<sup>1</sup>H NMR (500 MHz, CDCl<sub>3</sub>) and <sup>13</sup>C NMR (125 MHz, CDCl<sub>3</sub>) spectra for 5k**

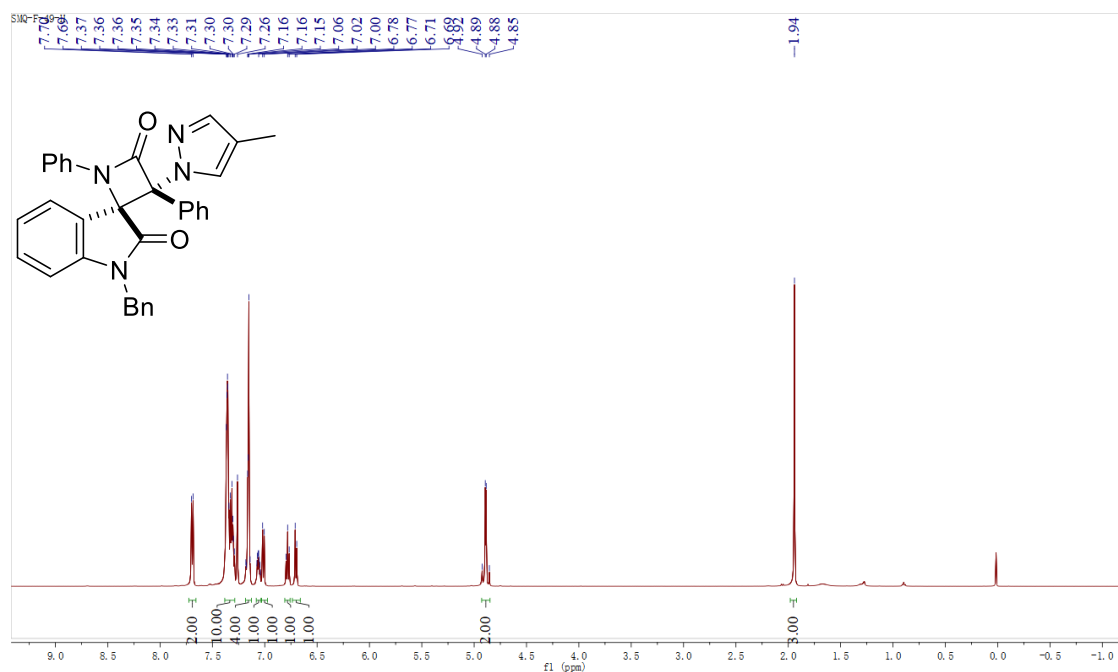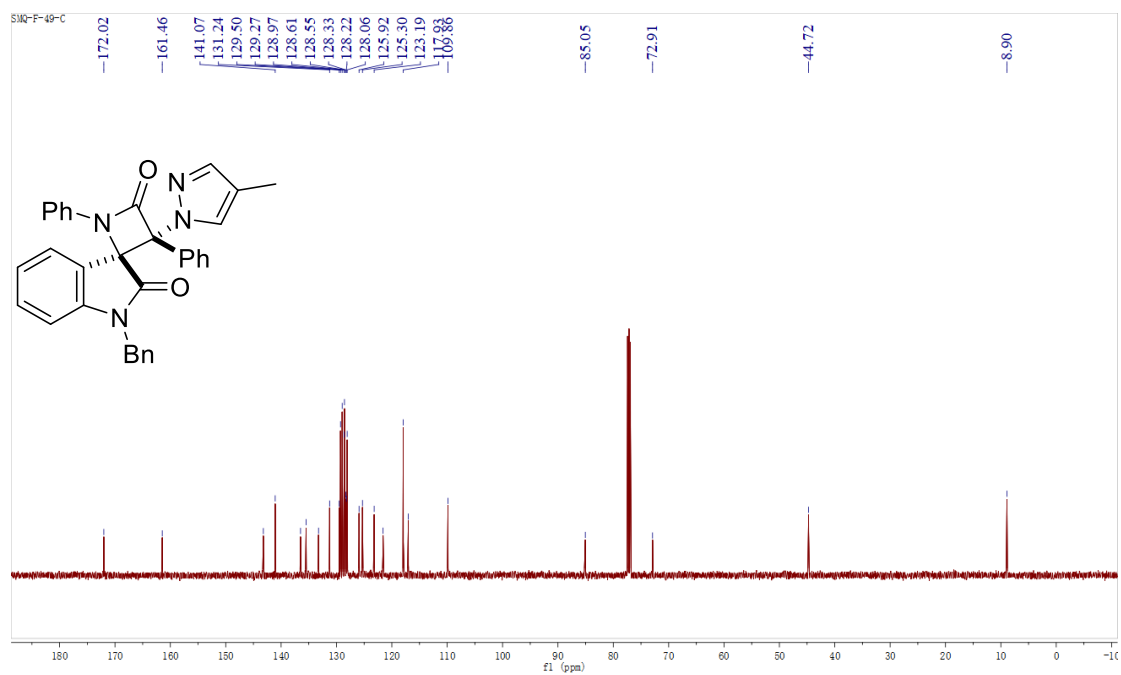

**$^1\text{H}$  NMR (500 MHz,  $\text{CDCl}_3$ ) and  $^{13}\text{C}$  NMR (125 MHz,  $\text{CDCl}_3$ ) spectra for 5l**

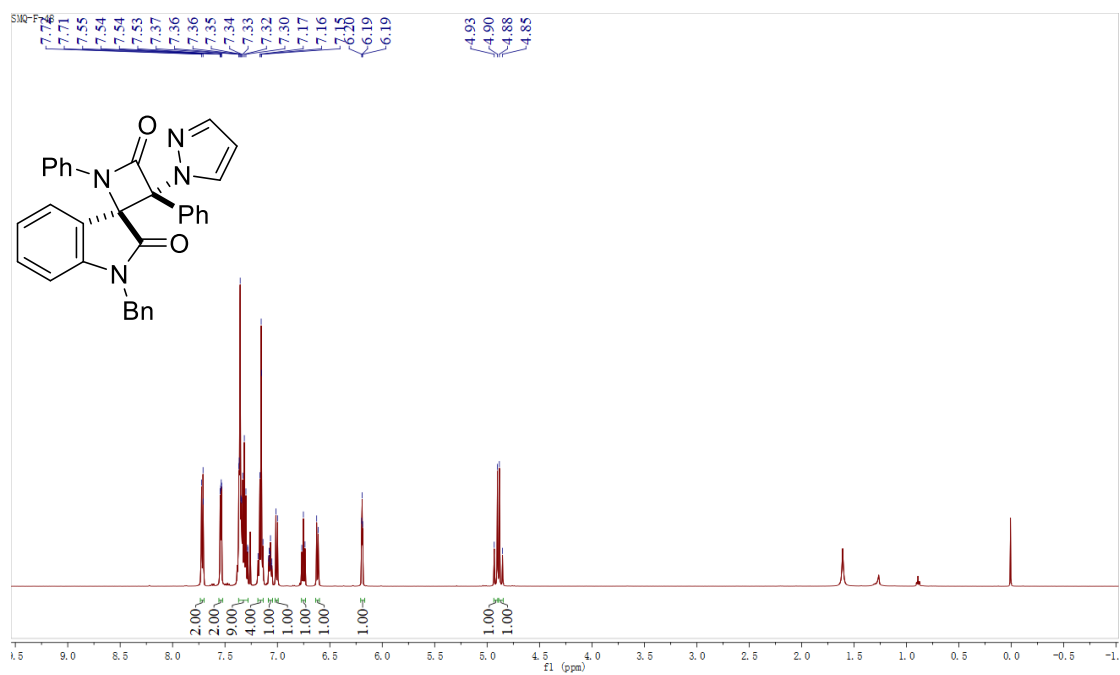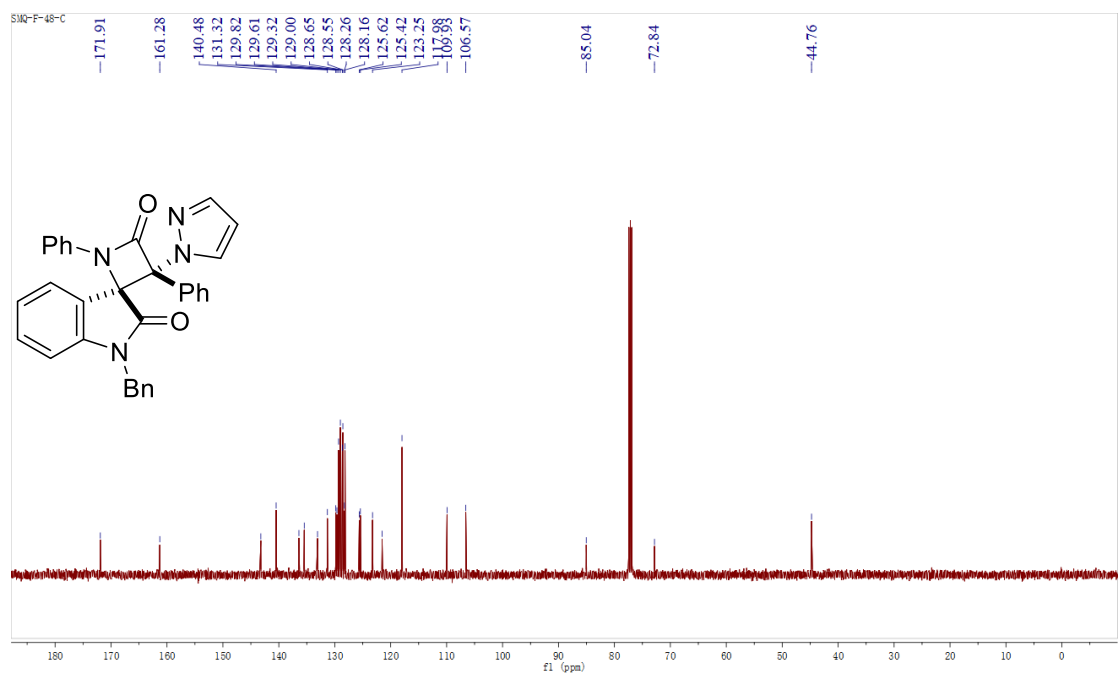



**<sup>1</sup>H NMR (500 MHz, CDCl<sub>3</sub>) and <sup>13</sup>C NMR (125 MHz, CDCl<sub>3</sub>) spectra for 5m**

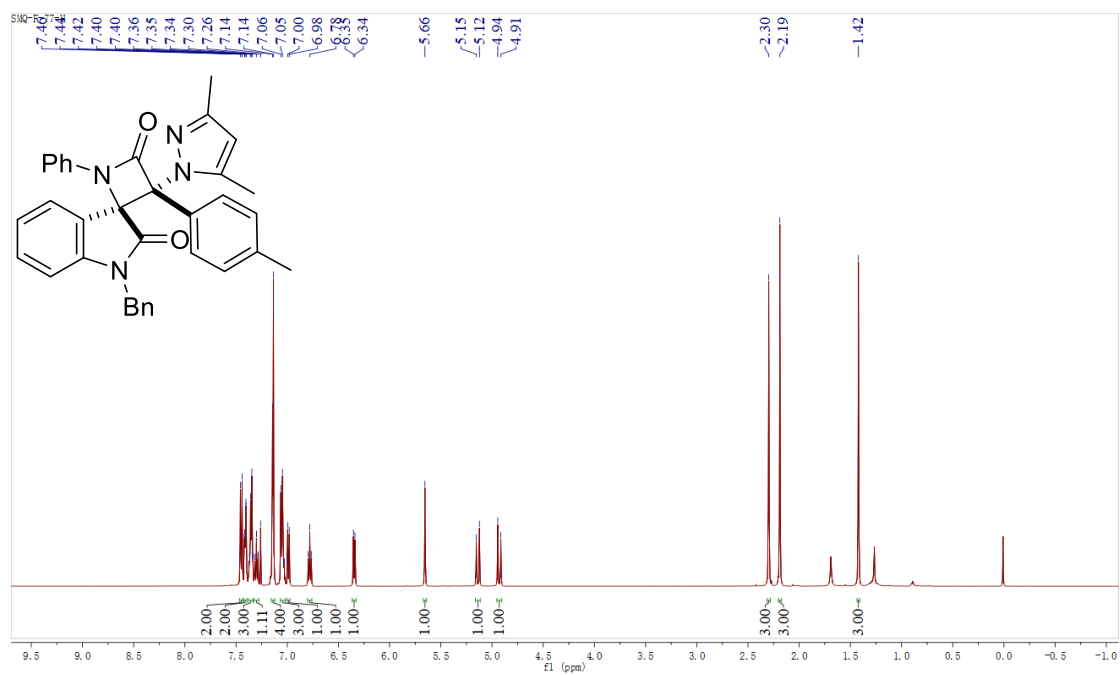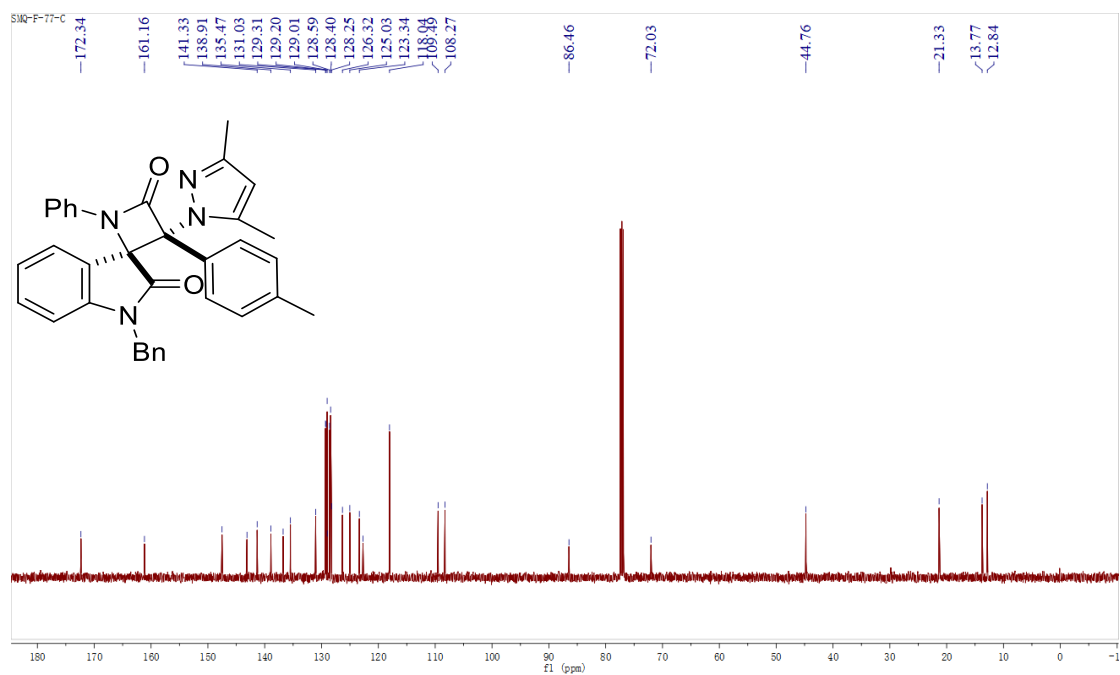

**$^1\text{H}$  NMR (500 MHz,  $\text{CDCl}_3$ ) and  $^{13}\text{C}$  NMR (125 MHz,  $\text{CDCl}_3$ ) spectra for 5n**

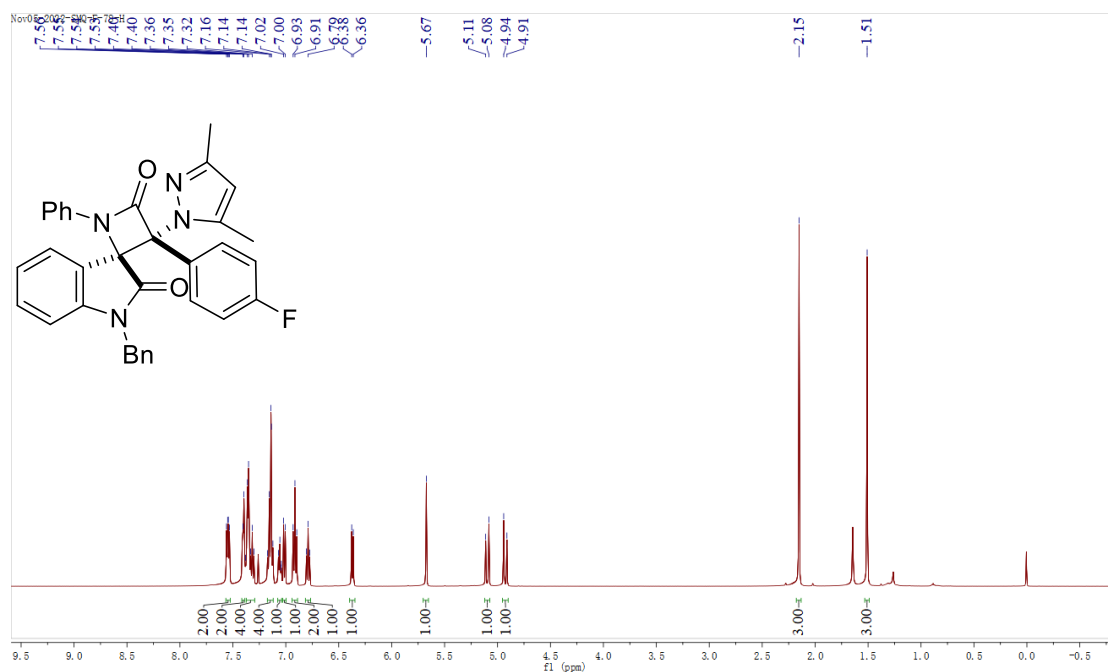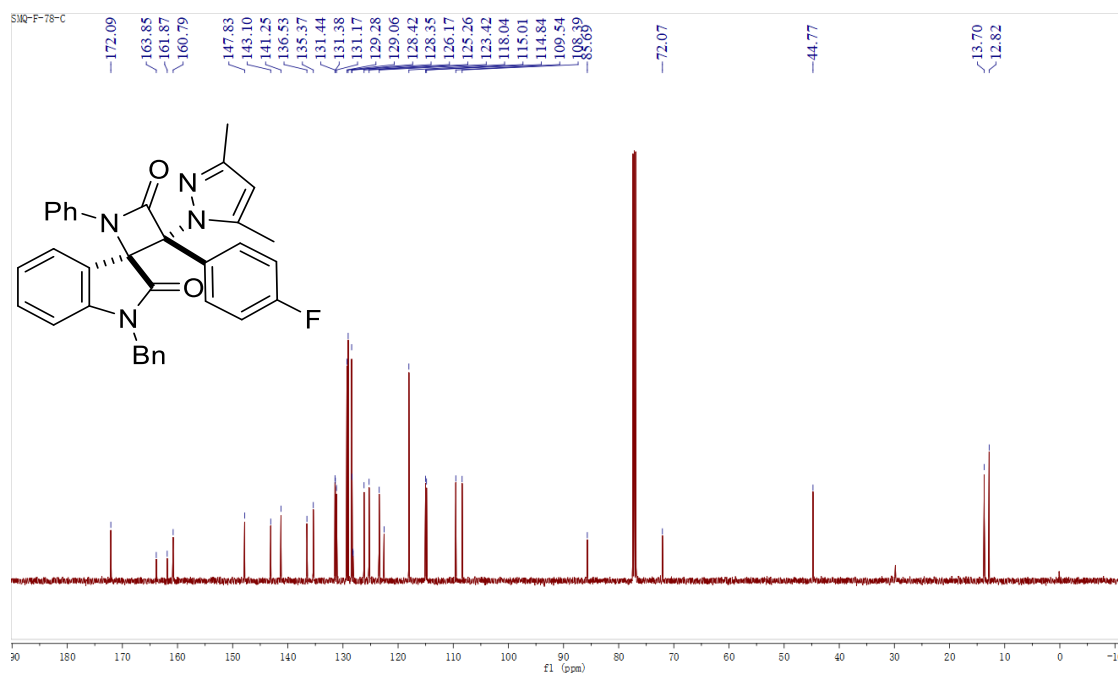

**<sup>19</sup>F NMR (376 MHz, CDCl<sub>3</sub>) spectra for 5n**

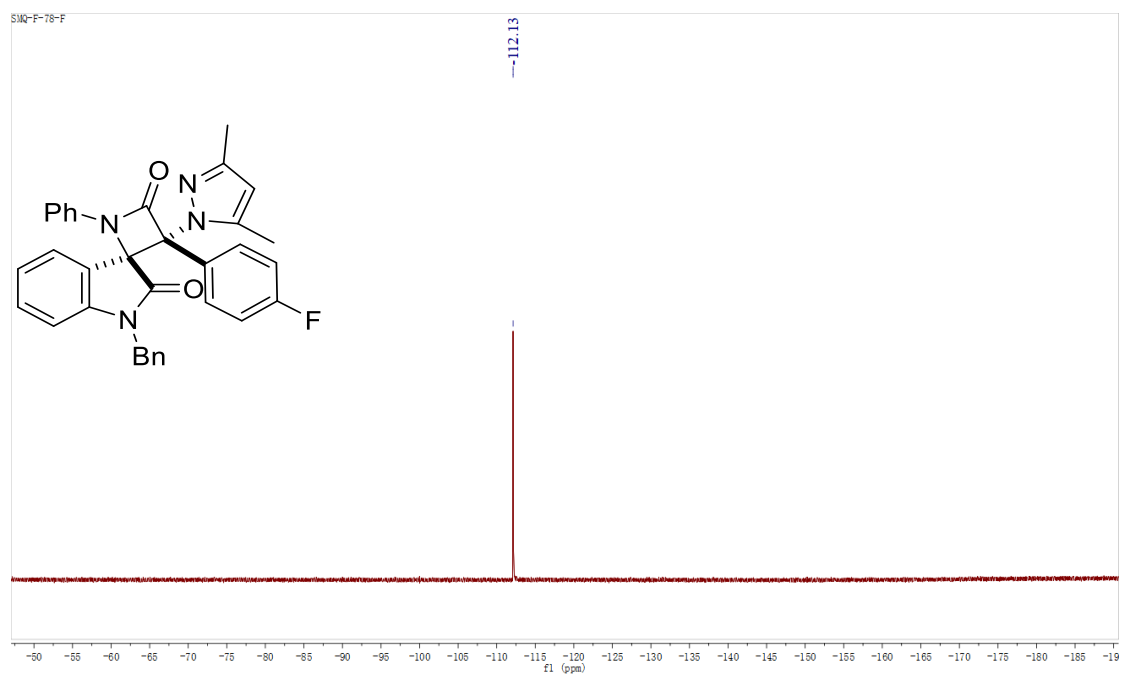

**$^1\text{H}$  NMR (500 MHz,  $\text{CDCl}_3$ ) and  $^{13}\text{C}$  NMR (125 MHz,  $\text{CDCl}_3$ ) spectra for 5'a**

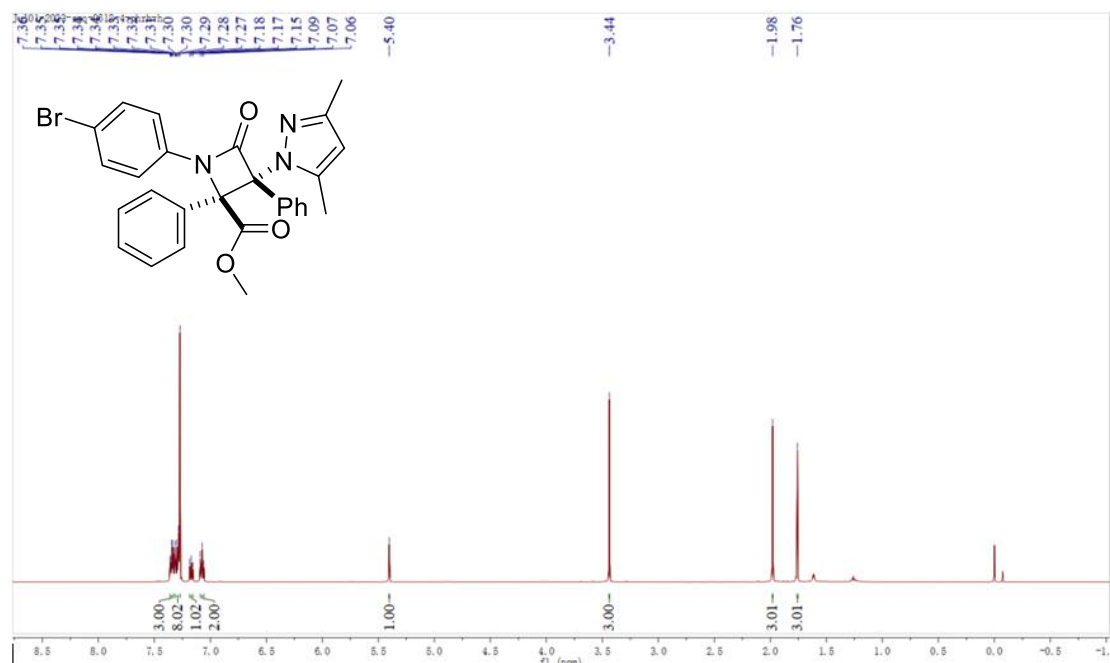

$^{13}\text{C}$  NMR (125 MHz,  $\text{CDCl}_3$ )  $\delta$  168.7, 160.0, 148.4, 141.2, 135.8, 134.1, 131.7, 130.5, 129.2, 129.0, 128.5, 128.3, 127.6, 127.3, 120.5, 117.6, 108.1, 100.0, 87.1, 78.8, 52.6, 29.7, 13.5, 13.0.

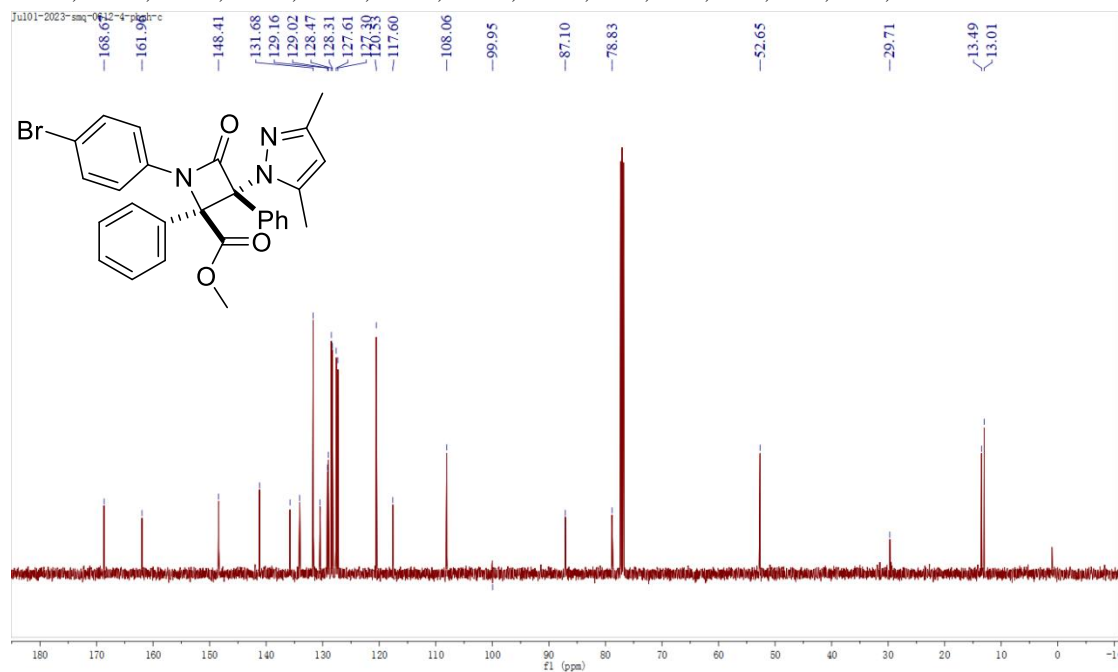

<sup>1</sup>H NMR (500 MHz, CDCl<sub>3</sub>) and <sup>13</sup>C NMR (125 MHz, CDCl<sub>3</sub>) spectra for 5'b

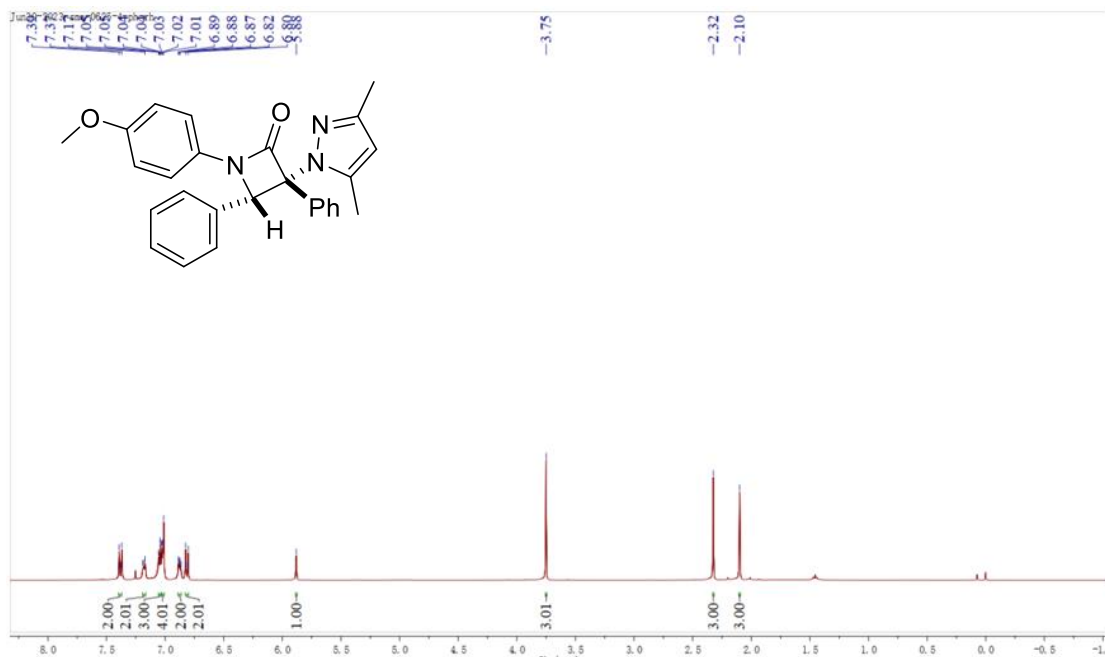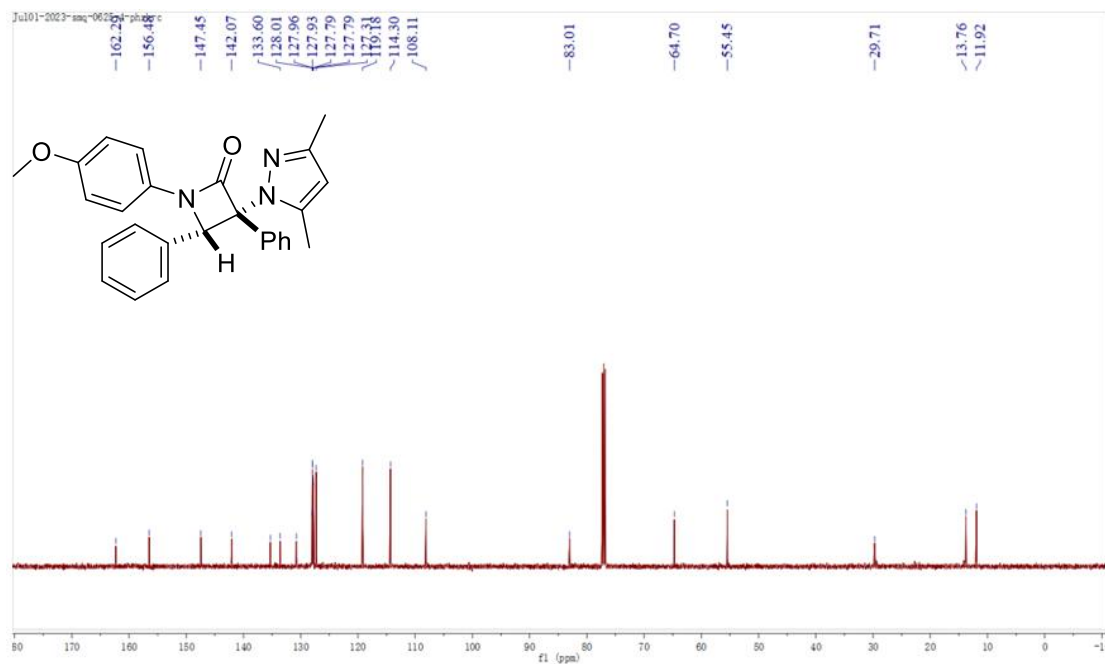

<sup>1</sup>H NMR (500 MHz, CDCl<sub>3</sub>) and <sup>13</sup>C NMR (125 MHz, CDCl<sub>3</sub>) spectra for 6a

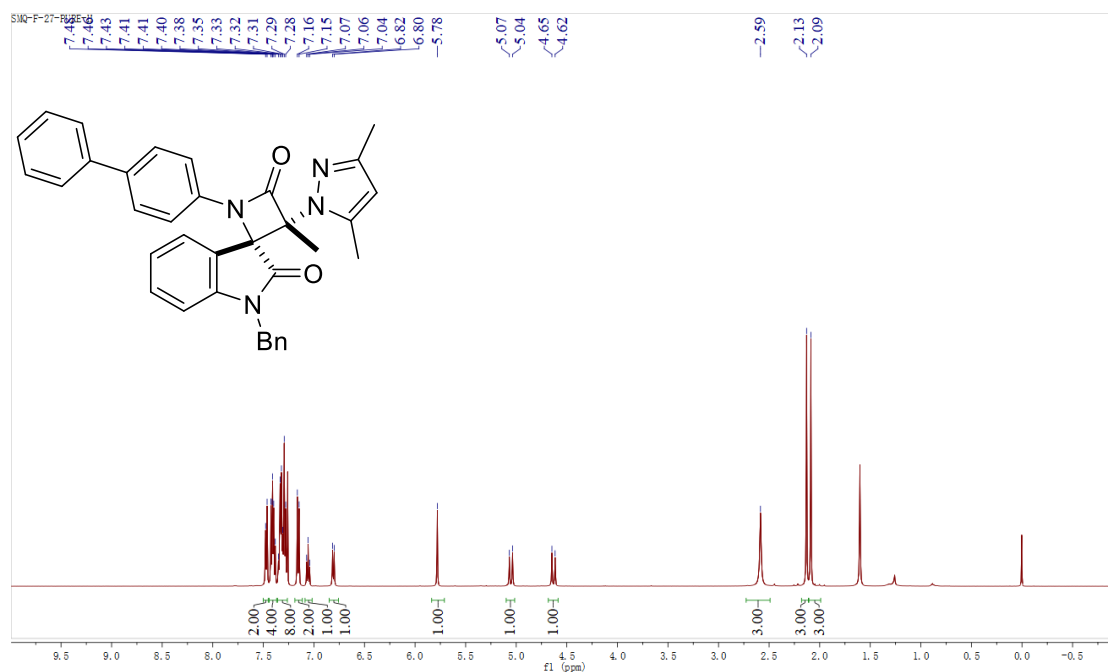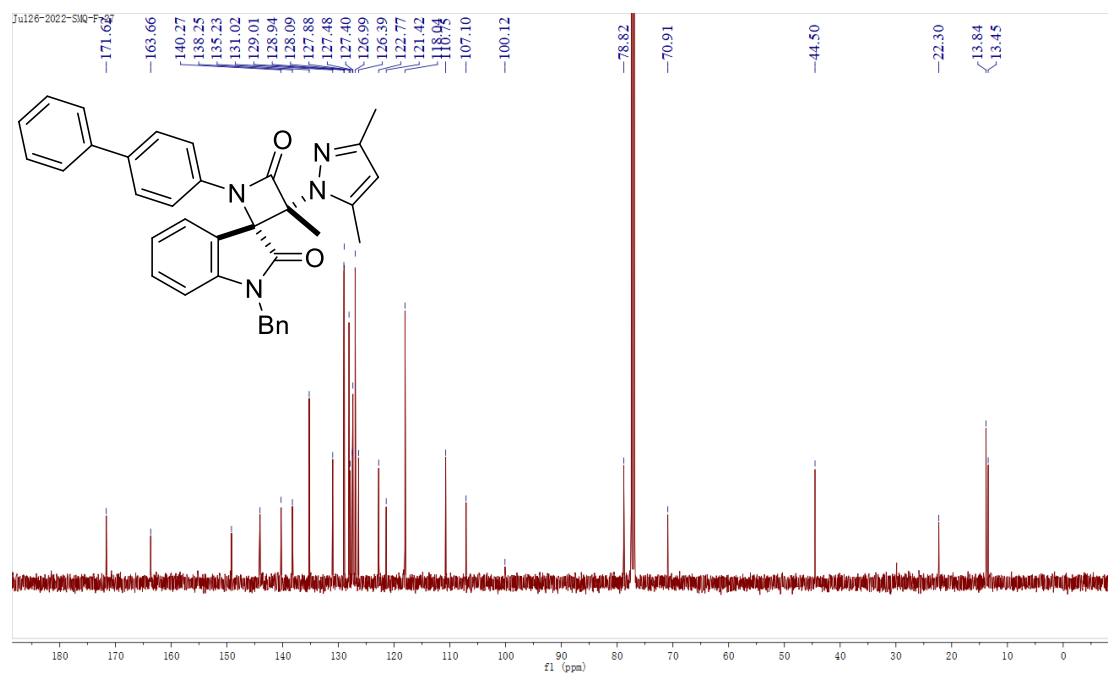

**<sup>1</sup>H NMR (400 MHz, CDCl<sub>3</sub>) and <sup>13</sup>C NMR (100 MHz, CDCl<sub>3</sub>) spectra for 6b**

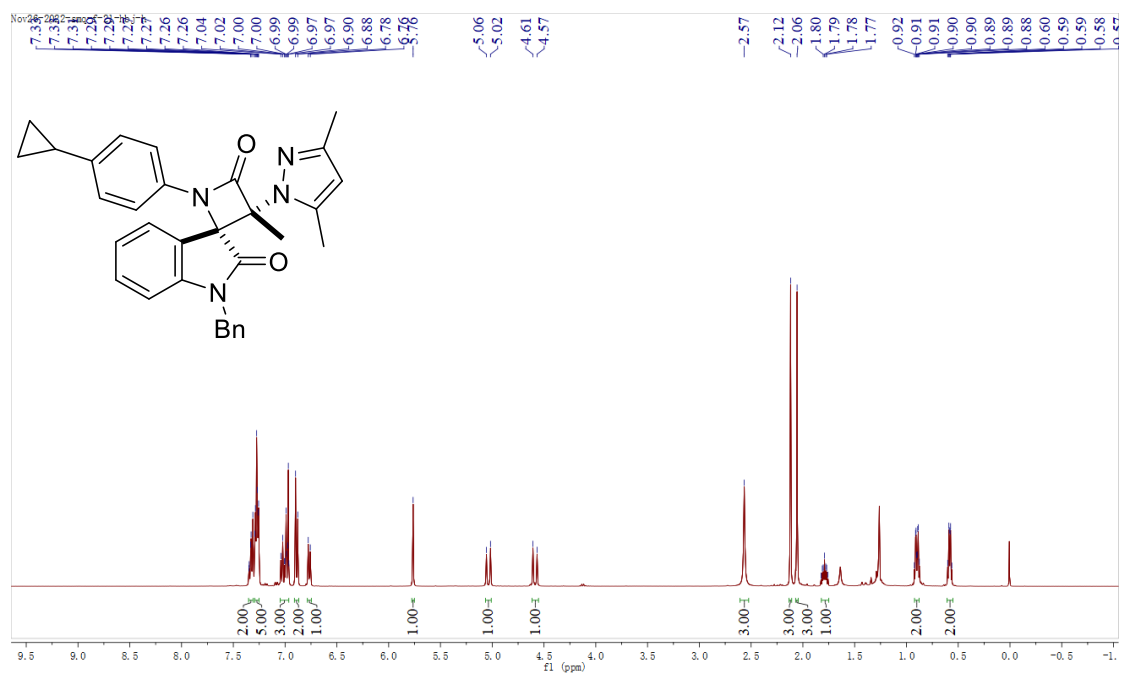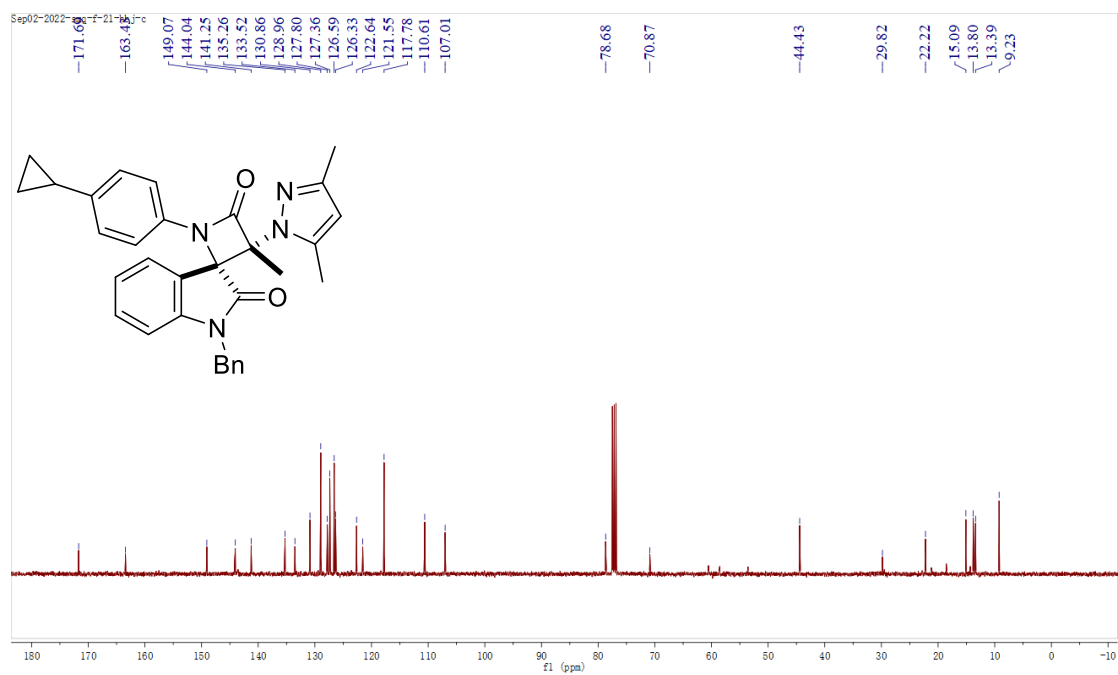

**<sup>1</sup>H NMR (500 MHz, DMSO-d<sub>6</sub>) and <sup>13</sup>C NMR (125 MHz, DMSO-d<sub>6</sub>) spectra for 7**

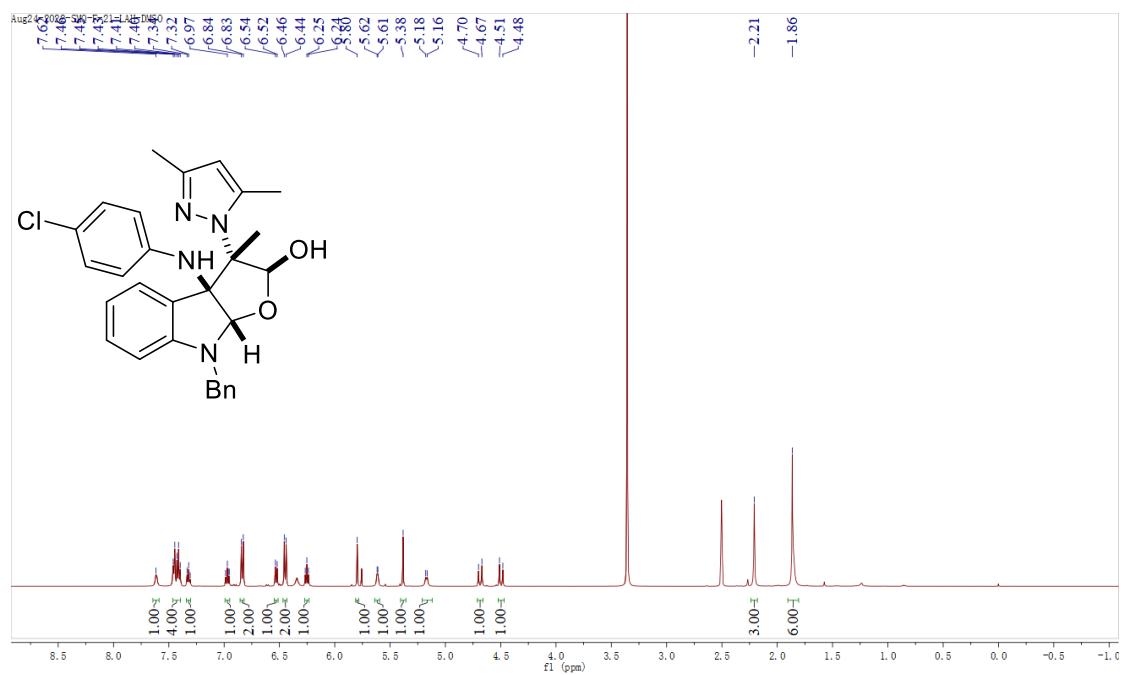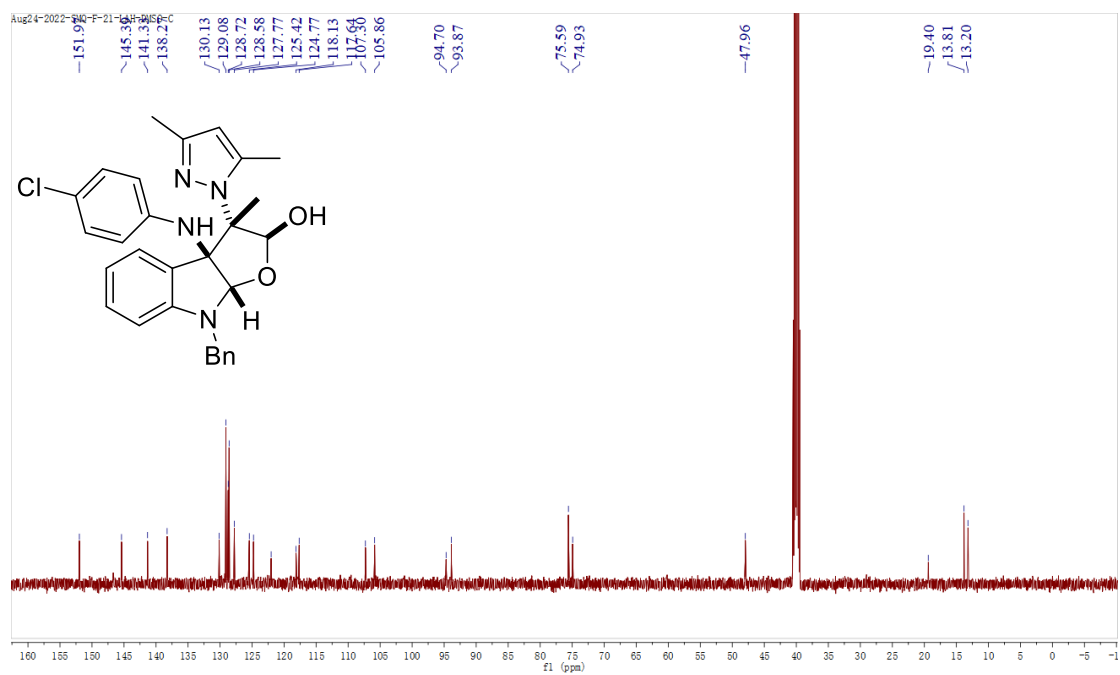



**<sup>1</sup>H NMR (500 MHz, CDCl<sub>3</sub>) and <sup>13</sup>C NMR (125 MHz, CDCl<sub>3</sub>) spectra for 8**

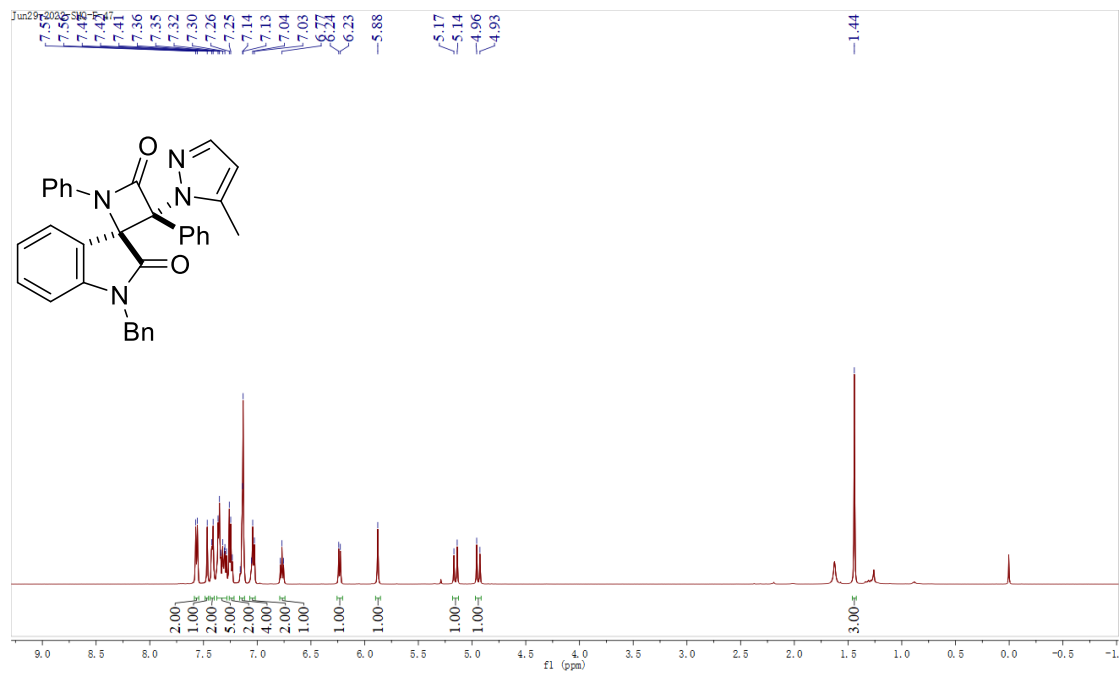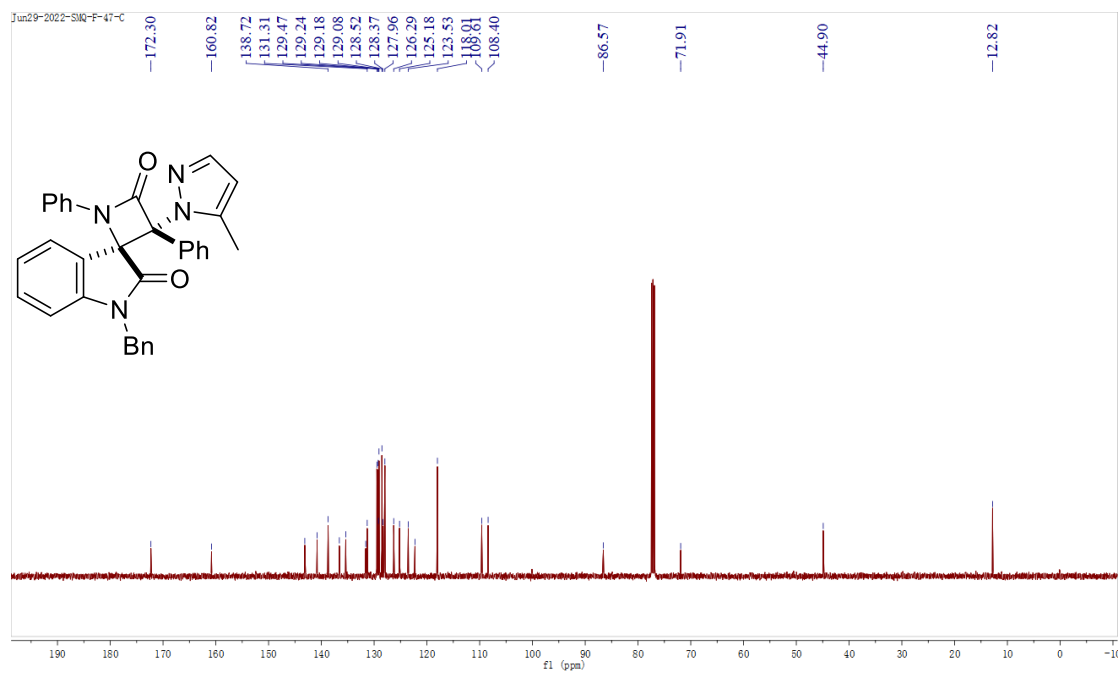

## 9. Single crystal X-ray diffraction data

### Single crystal X-ray diffraction data of 3a (CDCC No.: 2173515)

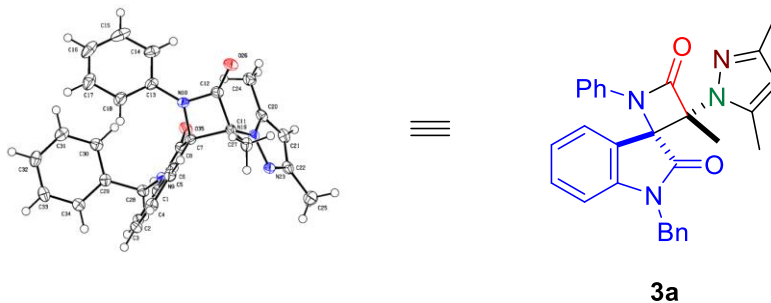

Bond precision: C-C = 0.0019 Å

Wavelength=1.54184

Cell: a=12.0222 (2)  
alpha=90

b=8.7354 (2)  
beta=95.275 (1)

c=22.4535 (3)  
gamma=90

Temperature: 100 K

|                                     | Calculated                                                    |
|-------------------------------------|---------------------------------------------------------------|
| Volume                              | 2348.05 (7)                                                   |
| Space group                         | P 21/n                                                        |
| Hall group                          | -P 2yn                                                        |
| Moiety formula                      | C <sub>29</sub> H <sub>26</sub> N <sub>4</sub> O <sub>2</sub> |
| Sum formula                         | C <sub>29</sub> H <sub>26</sub> N <sub>4</sub> O <sub>2</sub> |
| Mr                                  | 462.54                                                        |
| D <sub>x</sub> , g cm <sup>-3</sup> | 1.308                                                         |
| Z                                   | 4                                                             |
| Mu (mm <sup>-1</sup> )              | 0.668                                                         |
| F <sub>000</sub>                    | 976.0                                                         |
| F <sub>000</sub> '                  | 978.80                                                        |
| h, k, lmax                          | 15, 10, 28                                                    |
| Nref                                | 4854                                                          |
| Tmin, Tmax                          | 0.792, 0.818                                                  |
| Tmin'                               | 0.792                                                         |

|                                     | Reported                                                      |
|-------------------------------------|---------------------------------------------------------------|
| Volume                              | 2348.05 (7)                                                   |
| Space group                         | P 1 21/n 1                                                    |
| Hall group                          | -P 2yn                                                        |
| Moiety formula                      | C <sub>29</sub> H <sub>26</sub> N <sub>4</sub> O <sub>2</sub> |
| Sum formula                         | C <sub>29</sub> H <sub>26</sub> N <sub>4</sub> O <sub>2</sub> |
| Mr                                  | 462.54                                                        |
| D <sub>x</sub> , g cm <sup>-3</sup> | 1.308                                                         |
| Z                                   | 4                                                             |
| Mu (mm <sup>-1</sup> )              | 0.668                                                         |
| F <sub>000</sub>                    | 976.0                                                         |
| h, k, lmax                          | 15, 10, 27                                                    |
| Nref                                | 4632                                                          |
| Tmin, Tmax                          | 0.530, 1.000                                                  |

Correction method= # Reported T Limits: Tmin=0.530 Tmax=1.000  
AbsCorr = MULTI-SCAN

Data completeness= 0.954

Theta (max)= 75.300

R(reflections)= 0.0392 ( 4098)

wR2(reflections)=  
0.1041 ( 4632)

S = 1.065

Npar= 320

Single crystal X-ray diffraction data of 5a (CDCC No.: 2223042)

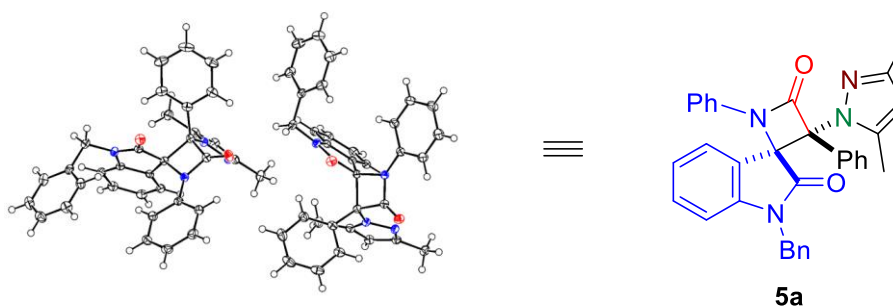

Bond precision: C-C = 0.0020 Å Wavelength=1.54184  
 Cell: a=16.8499(1) b=16.0418(1) c=19.5299(1)  
 alpha=90 beta=90.450(1) gamma=90  
 Temperature: 100 K

|                        | Calculated    | Reported      |
|------------------------|---------------|---------------|
| Volume                 | 5278.82(5)    | 5278.82(5)    |
| Space group            | P 21/c        | P 1 21/c 1    |
| Hall group             | -P 2ybc       | -P 2ybc       |
| Moiety formula         | C34 H28 N4 O2 | C34 H28 N4 O2 |
| Sum formula            | C34 H28 N4 O2 | C34 H28 N4 O2 |
| Mr                     | 524.60        | 524.60        |
| Dx, g cm <sup>-3</sup> | 1.320         | 1.320         |
| Z                      | 8             | 8             |
| Mu (mm <sup>-1</sup> ) | 0.663         | 0.663         |
| F000                   | 2208.0        | 2208.0        |
| F000'                  | 2214.30       |               |
| h, k, lmax             | 21, 20, 24    | 21, 19, 24    |
| Nref                   | 10972         | 10510         |
| Tmin, Tmax             | 0.820, 0.876  | 0.848, 1.000  |
| Tmin'                  | 0.767         |               |

Correction method= # Reported T Limits: Tmin=0.848 Tmax=1.000  
 AbsCorr = MULTI-SCAN

Data completeness= 0.958 Theta(max)= 75.668

R(reflections)= 0.0404( 10252) wR2(reflections)=  
 0.0943( 10510)  
 S = 1.146 Npar= 725

# Single crystal X-ray diffraction data of 7 (CDCC No.: 2223035)

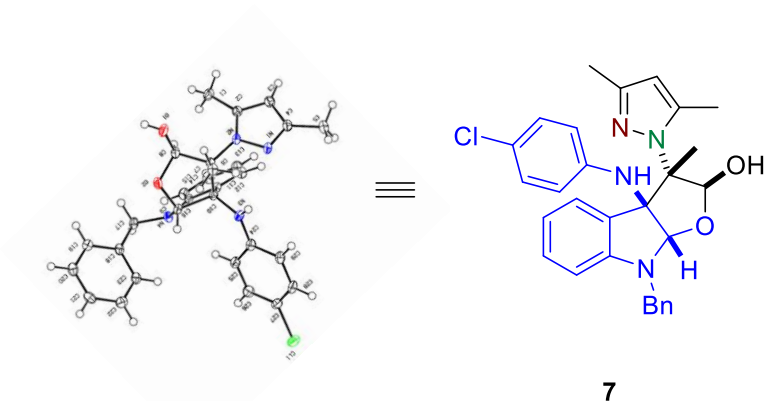

Bond precision: C-C = 0.0069 Å      Wavelength=1.54184

Cell:                a=9.9599 (5)                b=11.0330 (3)                c=11.8000 (5)  
                      alpha=86.694 (3)        beta=71.741 (4)            gamma=86.666 (3)

Temperature:        100 K

|                                     | Calculated                                                       | Reported                                                         |
|-------------------------------------|------------------------------------------------------------------|------------------------------------------------------------------|
| Volume                              | 1228.24 (9)                                                      | 1228.24 (9)                                                      |
| Space group                         | P -1                                                             | P -1                                                             |
| Hall group                          | -P 1                                                             | -P 1                                                             |
| Moiety formula                      | C <sub>29</sub> H <sub>29</sub> Cl N <sub>4</sub> O <sub>2</sub> | C <sub>29</sub> H <sub>29</sub> Cl N <sub>4</sub> O <sub>2</sub> |
| Sum formula                         | C <sub>29</sub> H <sub>29</sub> Cl N <sub>4</sub> O <sub>2</sub> | C <sub>29</sub> H <sub>29</sub> Cl N <sub>4</sub> O <sub>2</sub> |
| Mr                                  | 501.01                                                           | 501.01                                                           |
| Dx, g cm <sup>-3</sup>              | 1.355                                                            | 1.355                                                            |
| Z                                   | 2                                                                | 2                                                                |
| Mu (mm <sup>-1</sup> )              | 1.655                                                            | 1.655                                                            |
| F <sub>000</sub>                    | 528.0                                                            | 528.0                                                            |
| F <sub>000</sub> '                  | 530.13                                                           |                                                                  |
| h, k, l <sub>max</sub>              | 12, 13, 14                                                       | 12, 13, 14                                                       |
| N <sub>ref</sub>                    | 5082                                                             | 4815                                                             |
| T <sub>min</sub> , T <sub>max</sub> | 0.652, 0.847                                                     | 0.339, 1.000                                                     |
| T <sub>min</sub> '                  | 0.570                                                            |                                                                  |

Correction method= # Reported T Limits: T<sub>min</sub>=0.339 T<sub>max</sub>=1.000  
AbsCorr = MULTI-SCAN

Data completeness= 0.947                      Theta(max)= 75.346

R(reflections)= 0.0841 ( 4534)                      wR<sub>2</sub>(reflections)=  
S = 1.020                                              N<sub>par</sub>= 329                      0.2461 ( 4815)

Single crystal X-ray diffraction data of **8** (CDCC No.: 2209013)

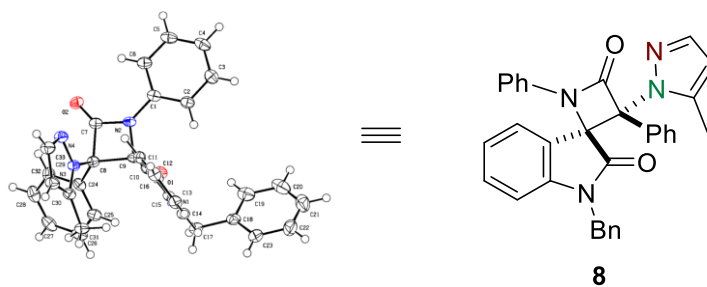

Bond precision: C-C = 0.0029 Å      Wavelength=1.54184

Cell:                    a=13.1778 (4)      b=14.3635 (4)      c=13.5804 (4)  
                               alpha=90            beta=96.473 (3)    gamma=90

Temperature:        100 K

|                        | Calculated    | Reported      |
|------------------------|---------------|---------------|
| Volume                 | 2554.10 (13)  | 2554.10 (13)  |
| Space group            | P 21/n        | P 1 21/n 1    |
| Hall group             | -P 2yn        | -P 2yn        |
| Moiety formula         | C33 H26 N4 O2 | C33 H26 N4 O2 |
| Sum formula            | C33 H26 N4 O2 | C33 H26 N4 O2 |
| Mr                     | 510.58        | 510.58        |
| Dx, g cm <sup>-3</sup> | 1.328         | 1.328         |
| Z                      | 4             | 4             |
| Mu (mm <sup>-1</sup> ) | 0.671         | 0.671         |
| F000                   | 1072.0        | 1072.0        |
| F000'                  | 1075.08       |               |
| h, k, lmax             | 16, 18, 17    | 16, 17, 16    |
| Nref                   | 5311          | 4962          |
| Tmin, Tmax             |               | 0.189, 1.000  |
| Tmin'                  |               |               |

Correction method= # Reported T Limits: Tmin=0.189 Tmax=1.000  
 AbsCorr = MULTI-SCAN

Data completeness= 0.934      Theta (max)= 75.695

R(reflections)= 0.0564 ( 4171)      wR2(reflections)=  
 0.1628 ( 4962)

S = 1.048      Npar= 353

## 10. Computational Studies

### Method

We performed calculations with Gaussian 09 program, We ran the geometry optimization, frequency and structures with m062x/6-31G(d)/Lanl2dz (6-31G(d) is applied to nonmetal elements such as C, H, O, N and Lanl2dz is used for silver element). We added Solvent effect with self-consistent reaction field (SCRF) method based on SMD model in dichloromethane ( $\epsilon=9.1$ ). The 3D optimized structures were displayed by CYLview visualization program.

### DFT studies of intermediate stability ([Ag] = AgOTf)

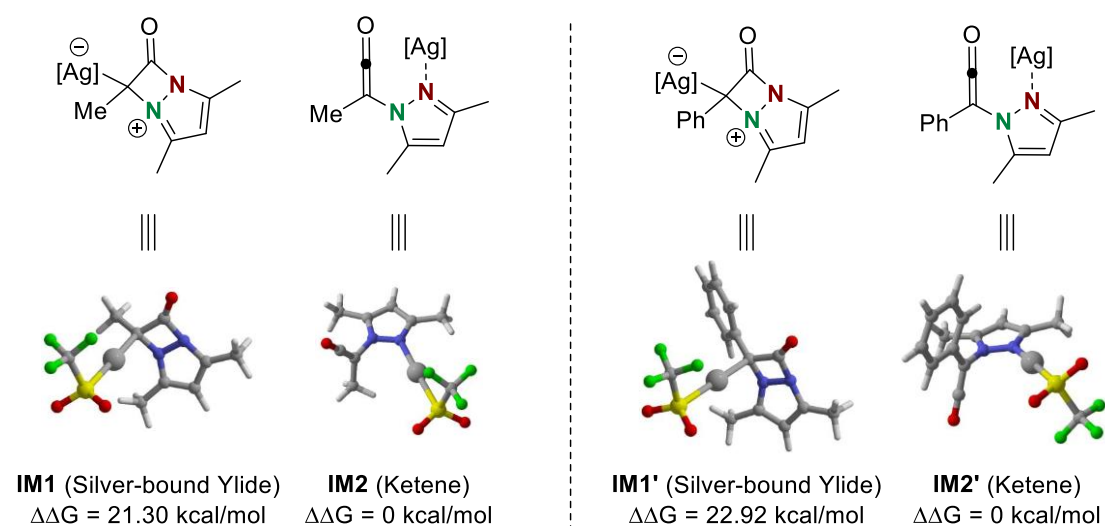

### Reference:

1. Gaussian 09, Revision D.01,

M. J. Frisch, G. W. Trucks, H. B. Schlegel, G. E. Scuseria, M. A. Robb, J. R. Cheeseman, G. Scalmani, V. Barone, B. Mennucci, G. A. Petersson, H. Nakatsuji, M. Caricato, X. Li, H. P. Hratchian, A. F. Izmaylov, J. Bloino, G. Zheng, J. L. Sonnenberg, M. Hada, M. Ehara, K. Toyota, R. Fukuda, J. Hasegawa, M. Ishida, T. Nakajima, Y. Honda, O. Kitao, H. Nakai, T. Vreven, J. A. Montgomery, Jr., J. E. Peralta, F. Ogliaro, M. Bearpark, J. J. Heyd, E. Brothers, K. N. Kudin, V. N. Staroverov, T. Keith, R. Kobayashi, J. Normand, K. Raghavachari, A. Rendell, J. C. Burant, S. S. Iyengar, J. Tomasi, M. Cossi, N. Rega, J. M. Millam, M. Klene, J. E. Knox, J. B. Cross, V. Bakken, C. Adamo, J. Jaramillo, R. Gomperts, R. E. Stratmann, O. Yazyev, A. J. Austin, R. Cammi, C. Pomelli, J. W. Ochterski, R. L. Martin, K. Morokuma, V. G. Zakrzewski, G. A. Voth, P. Salvador, J. J. Dannenberg, S. Dapprich, A. D. Daniels, O. Farkas, J. B. Foresman, J. V. Ortiz, J. Cioslowski, and D. J. Fox, Gaussian, Inc., Wallingford CT, 2013.

### Calculated Enthalpy and Gibbs Free Energy

| Structures | <i>H</i><br>(Hartree) | <i>G</i><br>(Hartree) | $\Delta H$<br>(Kcal/mol) | $\Delta G$<br>(Kcal/mol) |
|------------|-----------------------|-----------------------|--------------------------|--------------------------|
| Me-ketene  | -1526.86              | -1526.94              | 0                        | 0                        |
| Me-ylide   | -1526.82              | -1526.90              | 21.30                    | 23.82                    |
| Ph-ketene  | -1718.47              | -1718.56              | 0                        | 0                        |
| Ph-ylide   | -1718.44              | -1718.52              | 22.92                    | 24.23                    |

### Cartesian Coordinates

#### IM2:ketene

Imaginary sequence 0

0 1

|    |             |             |             |
|----|-------------|-------------|-------------|
| O  | -2.32766400 | -2.98004000 | 1.69258900  |
| C  | -5.25805600 | -0.36027100 | 0.28088100  |
| C  | -1.62269800 | 3.27465900  | 0.18185800  |
| C  | -2.24818900 | -1.90688600 | -1.69126200 |
| C  | -2.48223500 | -1.46281800 | -0.27286100 |
| N  | -2.79488000 | -0.10587600 | 0.00443800  |
| C  | -2.38608500 | -2.26635000 | 0.77756200  |
| N  | -1.81888400 | 0.83574600  | -0.02938900 |
| C  | -2.41335000 | 2.00833100  | 0.15803900  |
| C  | -3.80297100 | 1.81878500  | 0.31387300  |
| C  | -4.01606400 | 0.45952400  | 0.20318800  |
| H  | -6.12442200 | 0.29749700  | 0.36885500  |
| H  | -5.37812400 | -0.97903100 | -0.61408100 |
| H  | -5.23748400 | -1.02520500 | 1.15044900  |
| H  | -1.96627700 | 3.96178500  | -0.59688800 |
| H  | -1.72948600 | 3.78146600  | 1.14545100  |
| H  | -0.56135700 | 3.06245500  | 0.01582700  |
| H  | -3.16045600 | -1.78765400 | -2.28539100 |
| H  | -1.45417200 | -1.30389000 | -2.14829300 |
| H  | -1.94361100 | -2.95553100 | -1.72248000 |
| H  | -4.55269500 | 2.57815400  | 0.48232500  |
| Ag | 0.30489900  | 0.27265000  | -0.38038600 |
| S  | 2.74347000  | -0.30486200 | -0.76901400 |
| O  | 3.51376400  | 0.62519100  | -1.63453500 |
| O  | 3.04978700  | -1.75292800 | -0.90268700 |
| C  | 3.43766300  | 0.06669500  | 0.90785500  |
| F  | 4.72015900  | -0.27083600 | 1.00454200  |
| F  | 2.74739800  | -0.61103600 | 1.83432300  |
| F  | 3.31505100  | 1.37034900  | 1.17930100  |

#### IM1: ylide

Imaginary sequence 0

|     |             |             |             |
|-----|-------------|-------------|-------------|
| 0 1 |             |             |             |
| N   | -3.26952100 | -0.63588500 | 0.25169200  |
| C   | -3.81863600 | 0.07168900  | 1.27214400  |
| C   | -3.73820700 | 1.40975300  | 0.89643100  |
| C   | -3.02428300 | 1.47643600  | -0.31885800 |
| N   | -2.78303500 | 0.21753600  | -0.68297600 |
| C   | -1.68164300 | -0.69777400 | -1.13857300 |
| C   | -2.22760900 | -1.66263400 | -0.16060100 |
| O   | -2.07512000 | -2.75849200 | 0.26960400  |
| C   | -1.67519700 | -1.04886200 | -2.61099500 |
| C   | -4.41762200 | -0.58622600 | 2.46275500  |
| C   | -2.53916700 | 2.63482200  | -1.11296000 |
| Ag  | 0.30022000  | 0.04172500  | -0.35871200 |
| S   | 2.55351800  | 0.90775800  | 0.46591100  |
| O   | 2.68552000  | 1.13206400  | 1.93035000  |
| O   | 3.24117400  | 1.88590900  | -0.41890300 |
| C   | 3.59555700  | -0.60430800 | 0.22569100  |
| F   | 4.86097600  | -0.39947000 | 0.58200500  |
| F   | 3.56799200  | -0.97549400 | -1.06010600 |
| F   | 3.10665100  | -1.61648400 | 0.95207900  |
| H   | -4.14519700 | 2.25036900  | 1.44067700  |
| H   | -3.75367300 | -1.36786700 | 2.84261100  |
| H   | -4.59119900 | 0.15185900  | 3.24679600  |
| H   | -5.37257600 | -1.05120600 | 2.19820400  |
| H   | -2.66673600 | 3.55862300  | -0.54746300 |
| H   | -1.47681100 | 2.50432400  | -1.35240300 |
| H   | -3.09140800 | 2.71612200  | -2.05404800 |
| H   | -0.97390300 | -1.87212100 | -2.77602900 |
| H   | -2.66560200 | -1.35686500 | -2.96958000 |
| H   | -1.33394700 | -0.20020900 | -3.20931600 |

**IM2':ketene**

Imaginary sequence 0

|     |            |             |             |
|-----|------------|-------------|-------------|
| 0 1 |            |             |             |
| O   | 1.86801500 | -0.19113500 | 3.44799100  |
| C   | 4.80687000 | 1.28784700  | 0.74991100  |
| C   | 0.83780100 | 3.55898800  | -1.60401200 |
| C   | 2.20838300 | -1.52554700 | 0.18918400  |
| C   | 2.22422800 | -0.28132900 | 0.98321000  |
| N   | 2.36564000 | 0.98331000  | 0.36039500  |
| C   | 2.02163100 | -0.23802200 | 2.30149800  |
| N   | 1.30243200 | 1.55712300  | -0.26111100 |
| C   | 1.75169200 | 2.66842000  | -0.82976100 |
| C   | 3.13316600 | 2.81414200  | -0.57099000 |



|    |             |             |             |
|----|-------------|-------------|-------------|
| C  | 3.49842300  | 1.71930200  | 0.18351900  |
| C  | 2.29502000  | -1.44513100 | -1.20607900 |
| C  | 2.26727500  | -2.60780500 | -1.97438300 |
| C  | 2.15061700  | -3.85397600 | -1.36558700 |
| C  | 2.06507300  | -3.93399600 | 0.02497100  |
| C  | 2.09521800  | -2.78125800 | 0.80014100  |
| H  | 5.57302900  | 2.02536500  | 0.50559700  |
| H  | 4.75147400  | 1.18756200  | 1.83849300  |
| H  | 5.10773600  | 0.31949500  | 0.33647600  |
| H  | 1.24104500  | 3.75165900  | -2.60207500 |
| H  | -0.14760500 | 3.09374500  | -1.70897700 |
| H  | 0.71687000  | 4.52259300  | -1.09988500 |
| H  | 3.77746000  | 3.61798600  | -0.89642300 |
| H  | 2.38952400  | -0.47748700 | -1.69166800 |
| H  | 2.33771100  | -2.53220000 | -3.05527000 |
| H  | 2.12766700  | -4.75708400 | -1.96681400 |
| H  | 1.97511600  | -4.90060600 | 0.51095000  |
| H  | 2.03483100  | -2.85961800 | 1.88343800  |
| Ag | -0.62094700 | 0.42938100  | -0.39453700 |
| S  | -2.88087700 | -0.73159900 | -0.43730100 |
| O  | -2.97881000 | -2.03008500 | 0.27826500  |
| O  | -3.65490200 | -0.60378900 | -1.69956800 |
| C  | -3.82512900 | 0.39492300  | 0.68993500  |
| F  | -5.09816500 | 0.02865800  | 0.80663400  |
| F  | -3.78211700 | 1.64651100  | 0.21464400  |
| F  | -3.26848100 | 0.40160500  | 1.90631800  |

### IM1'-ylide

Imaginary sequence 0

|     |             |             |             |
|-----|-------------|-------------|-------------|
| 0 1 |             |             |             |
| N   | -2.83825600 | -1.35866900 | -0.76545700 |
| C   | -3.04268600 | -2.67254300 | -0.48996700 |
| C   | -2.91450800 | -2.80269300 | 0.89064400  |
| C   | -2.50716400 | -1.55618000 | 1.40616600  |
| N   | -2.50613000 | -0.70230500 | 0.37901600  |
| C   | -1.61369100 | 0.28218800  | -0.30278600 |
| C   | -1.99165300 | -0.38369300 | -1.56278100 |
| O   | -1.82533800 | -0.34391000 | -2.73729600 |
| C   | -3.40191400 | -3.65751300 | -1.54248100 |
| C   | -2.10745500 | -1.14291900 | 2.77515600  |
| Ag  | 0.56579400  | -0.19758800 | 0.12853000  |
| S   | 2.99383200  | -0.74026600 | 0.70711600  |
| O   | 3.46884800  | -2.10527000 | 0.35768900  |
| O   | 3.51699400  | -0.15916700 | 1.97221800  |

|   |             |             |             |
|---|-------------|-------------|-------------|
| C | 3.86030500  | 0.29358400  | -0.56331600 |
| F | 5.18355500  | 0.20006300  | -0.46542400 |
| F | 3.51088300  | 1.57790400  | -0.42048600 |
| F | 3.49362500  | -0.09402900 | -1.79100100 |
| H | -3.08645800 | -3.70284100 | 1.46396500  |
| H | -2.77703000 | -3.51694900 | -2.42879300 |
| H | -3.27149300 | -4.67130100 | -1.16203400 |
| H | -4.44709400 | -3.52401800 | -1.83962700 |
| H | -1.82989400 | -2.01859900 | 3.36353000  |
| H | -1.25667200 | -0.45341400 | 2.72656400  |
| H | -2.93336000 | -0.63164600 | 3.28002100  |
| C | -1.87058500 | 1.72856800  | -0.09455200 |
| C | -2.62986900 | 2.18792100  | 0.98497500  |
| C | -1.33093800 | 2.65561700  | -0.99745200 |
| C | -2.84448400 | 3.55384300  | 1.15935300  |
| H | -3.05658700 | 1.47655700  | 1.68720800  |
| C | -1.55926700 | 4.01596000  | -0.82361800 |
| H | -0.73163600 | 2.30479000  | -1.83465700 |
| C | -2.31403900 | 4.47299100  | 0.25741400  |
| H | -3.43528700 | 3.89666100  | 2.00372600  |
| H | -1.14178600 | 4.72302600  | -1.53417700 |
| H | -2.48453300 | 5.53600100  | 0.39538400  |
